# Supplementary material for: Glaciological Measurements and Mass Balances from Sperry Glacier, Montana, USAYears 2005–2015
Source: Copernicus journal article supplement (doi:10.5194/essd-2016-39), 2016-09-13
Supplement: Supplementary file 1 [file essd-2016-39-supplement.pdf]

## 1 **Supplement: Glacier-Wide Mass Balance Maps**

2 Maps for balance years 2005-2015 displaying conventional glacier-wide seasonal and annual  
3 mass balances estimated using the site-index method. Elevation/balance contour lines are  
4 labelled and measurement points are indicated by yellow and black dots. Points labelled with  
5 letters indicate ablation stake sites.

6  
7 White dotted lines on the annual balance maps for years 2005, 2009, 2010, and 2013 specify  
8 the location of the seasonal snow line that was measured in the field at the end of the ablation  
9 season. The accumulation zone is located at elevations above this line.

10  
11 Balances assigned to each elevation band are labelled on each map. Italicized and underlined  
12 values indicate balances that have been inferred/extrapolated because no point balances are  
13 located in those bands. These values were derived from nearby measurement points, from  
14 mass balance gradients taken from two different measurement points, or in the case of winter  
15 balances above 2650 on the steep headwall, the mean  $b_w$  is used. Further details for each year  
16 are as follows:

### 17 **2005**

- 18 • Used a mass balance gradient value of 0.004 m w.e. m<sup>-1</sup> derived from Stakes A and D  
19 to calculate the winter balance in the 2600-2650 band.
- 20 • Used a mass balance gradient value of 0.003 m w.e. m<sup>-1</sup> derived from Stakes C and D  
21 to calculate summer balances in bands above 2550 m.

### 22 **2006**

- 23 • Used the average of points *19-annual transect* and *4-transect 106* for the winter balance  
24 in elevation band below 2300 m.
- 25 • Used a mass balance gradient value of 0.010 m w.e. m<sup>-1</sup> derived from Stakes C and q  
26 to calculate summer balances in bands above 2550 m.
- 27 • Used  $b_s$  from stake site m as the assigned balance to elevations below 2350 m.

### 28 **2007**

- 29 • Used a mass balance gradient value of 0.006 m w.e. m<sup>-1</sup> derived from Stakes C and D  
30 to calculate summer balances in bands above 2550 m.

### 31 **2008**

- 32 • Used a mass balance gradient value of 0.007 m w.e. m<sup>-1</sup> derived from Stakes C and D  
33 to calculate winter balances in the 2550-2600 & 2600-2650 bands
- 34 • Used a mass balance gradient value of 0.004 m w.e. m<sup>-1</sup> derived from Stakes C and D  
35 to calculate summer balances in bands above 2550 m.

### 36 **2009**

- 37 • Used a mass balance gradient value of 0.011 m w.e. m<sup>-1</sup> derived from Stakes A and D  
38 to calculate winter balance in the 2600-2650 band.
- 39 • Used a mass balance gradient value of 0.0004 m w.e. m<sup>-1</sup> derived from Stakes A and D  
40 to calculate summer balances in bands above 2550 m.

- 49 **2010**
- 50 • Used a mass balance gradient value of 0.007 m w.e. m<sup>-1</sup> derived from Stakes C and D
- 51 to calculate winter balance in the 2600-2650 band.
- 52 • Used a mass balance gradient value of 0.005 m w.e. m<sup>-1</sup> derived from Stakes C and D
- 53 to calculate summer balances in bands above 2550 m.
- 54
- 55 **2011**
- 56 • Used a mass balance gradient value of 0.006 m w.e. m<sup>-1</sup> derived from Stakes C and D
- 57 to calculate summer balances in bands above 2550 m.
- 58
- 59 **2012**
- 60 • Used a mass balance gradient value of 0.017 m w.e. m<sup>-1</sup> derived from Stakes C and D
- 61 to calculate winter balances in the 2550-2600 & 2600-2650 bands.
- 62 • Used a mass balance gradient value of 0.004 m w.e. m<sup>-1</sup> derived from Stakes C and D
- 63 to calculate summer balances in bands above 2550 m.
- 64
- 65 **2013**
- 66 • Used a mass balance gradient value of 0.015 m w.e. m<sup>-1</sup> derived from Stakes C and D
- 67 to calculate winter balances in the 2600-2650 band.
- 68 • Used a mass balance gradient value of 0.011 m w.e. m<sup>-1</sup> derived from Stakes C and D
- 69 to calculate summer balances in bands above 2550 m.
- 70 • Used  $b_s$  from stake site B as the assigned summer balance to elevations below 2300 m.
- 71
- 72 **2014**
- 73 • Used a mass balance gradient value of 0.019 m w.e. m<sup>-1</sup> derived from Stakes C and D
- 74 to calculate winter balances in the 2550-2600 & 2600-2650 bands.
- 75 • Used  $b_w$  from stake site B as the assigned winter balance to elevations below 2300 m.
- 76 • Used a mass balance gradient value of 0.004 m w.e. m<sup>-1</sup> derived from Stakes C and D
- 77 to calculate summer balances in bands above 2550 m.
- 78 • Used  $b_a$  from stake site B for the annual balance at elevations below 2300 m.
- 79
- 80 **2015**
- 81 • Used a mass balance gradient value of 0.012 m w.e. m<sup>-1</sup> derived from Stakes C and Z
- 82 to calculate winter balance in the 2600-2650 band.
- 83 • Used  $b_w$  from stake site B as the assigned winter balance to elevations below 2300 m.
- 84 • Used a mass balance gradient value of 0.015 m w.e. m<sup>-1</sup> derived from Stakes C and Z
- 85 to calculate summer balances in bands above 2600 m.
- 86 • Used  $b_s$  and  $b_a$  from stake site B to assign summer and annual balances to elevations
- 87 below 2300 m.

297000.000000

5390000.000000

5390000.000000

### 2005 Glacier-wide Winter Mass Balance 2.33 m w.e.

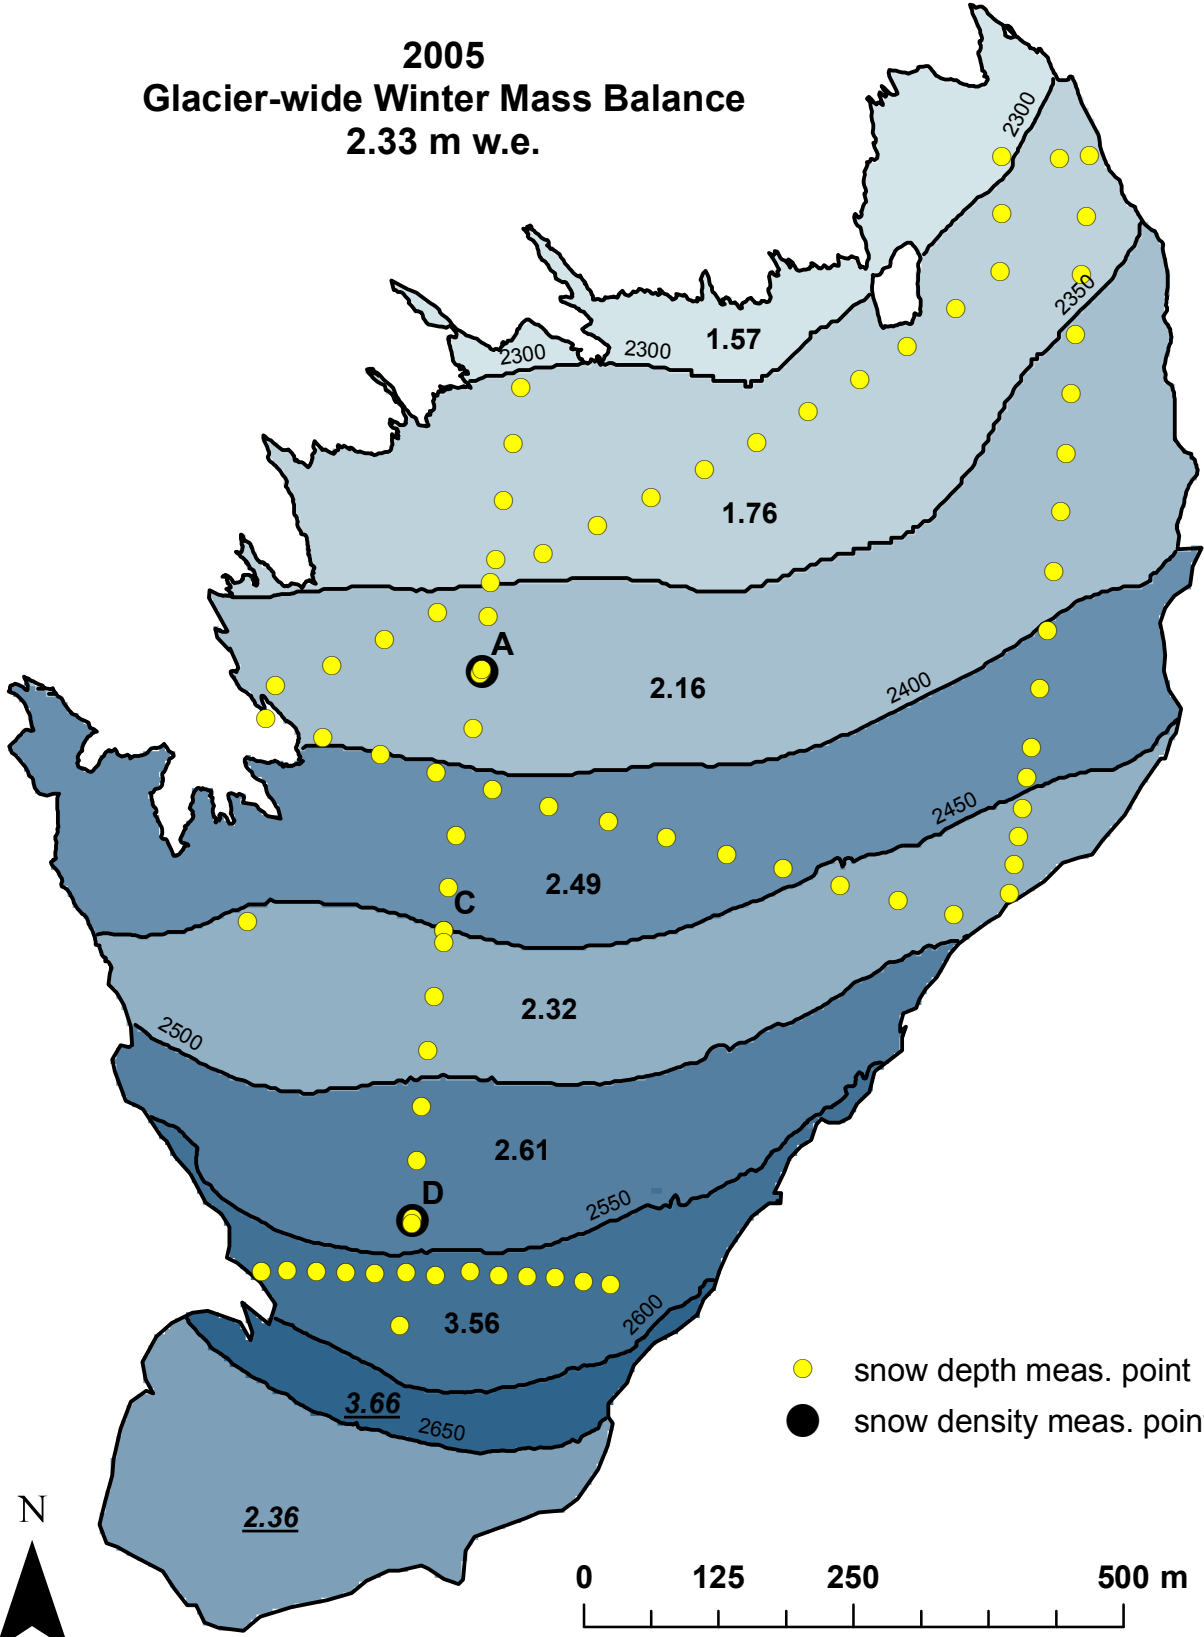

- snow depth meas. point
- snow density meas. point

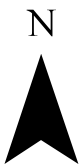

0 125 250 500 m

NAD83 UTM 12N

297000.000000

297000 000000

5390000 000000

5390000 000000

**2006  
Glacier-wide Winter Mass Balance  
2.78 m w.e.**

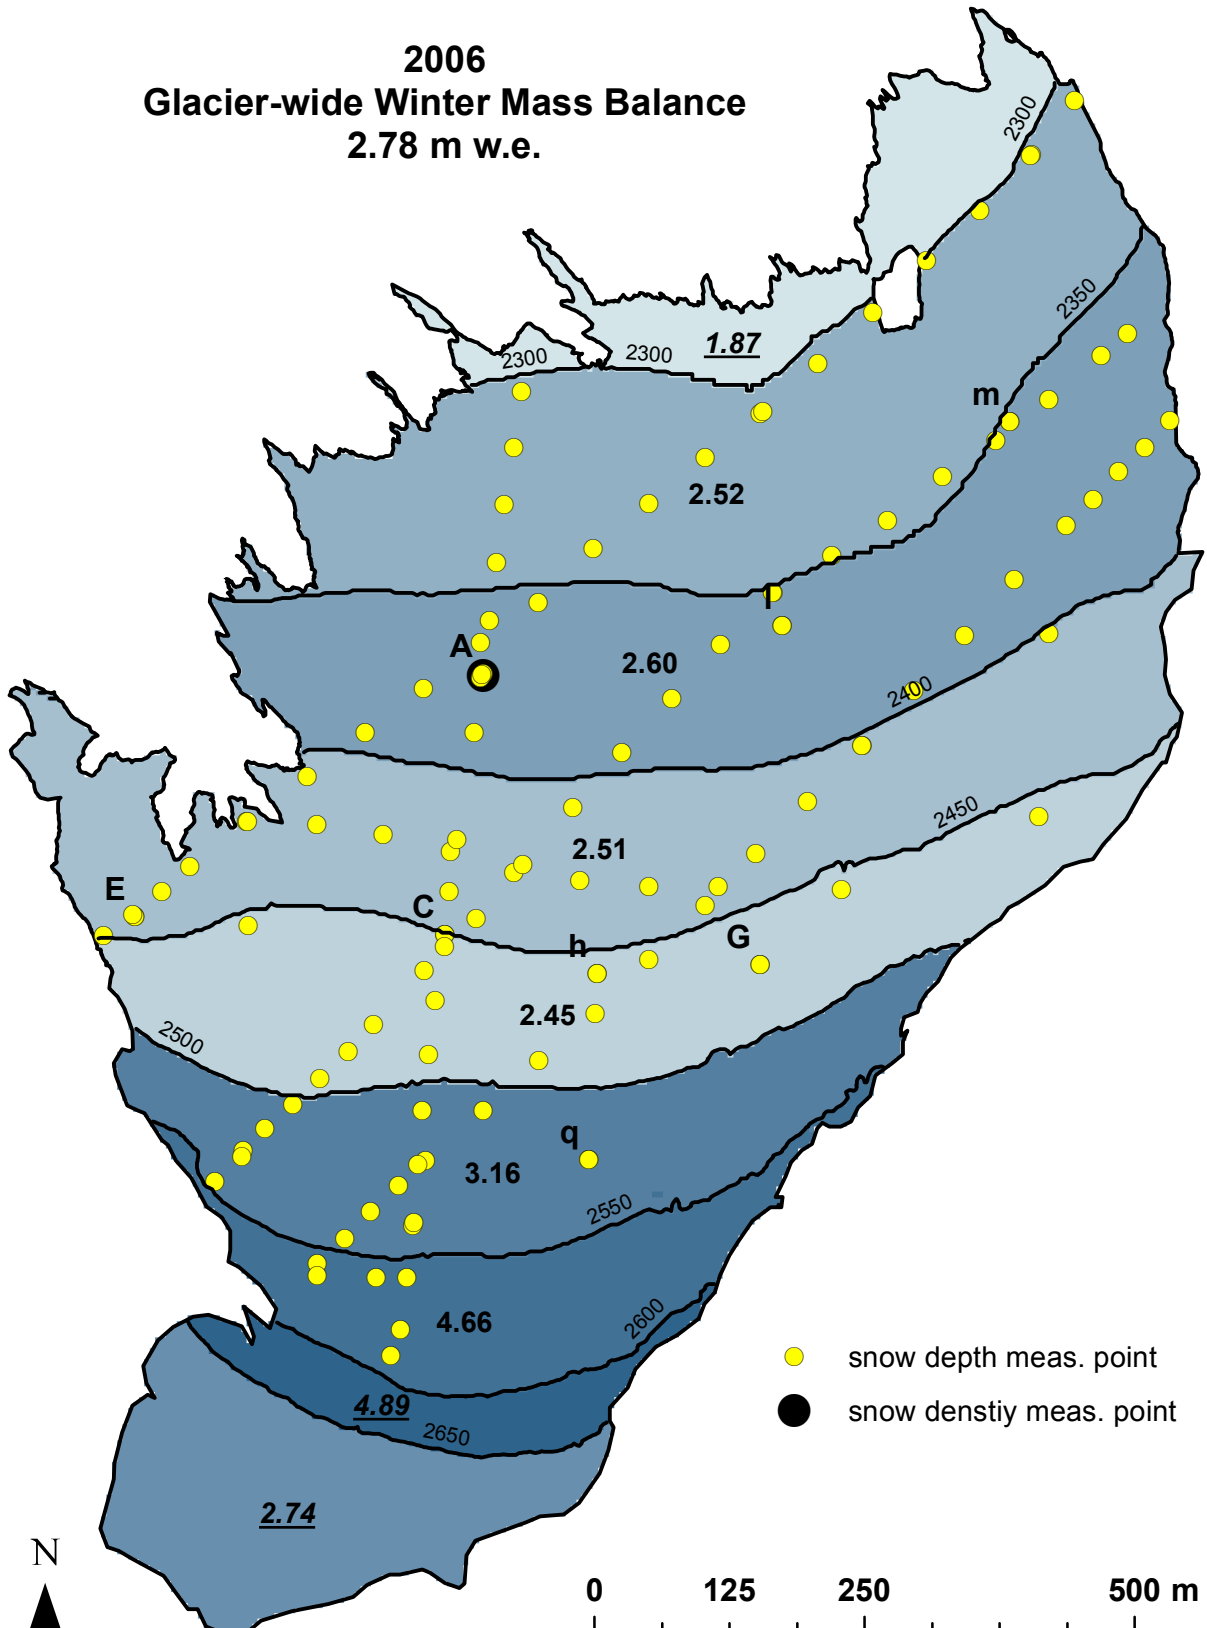

- snow depth meas. point
- snow density meas. point

0 125 250 500 m

**NAD83 UTM 12N**

297000 000000

**2007  
Glacier-wide Winter Mass Balance  
2.19 m w.e.**

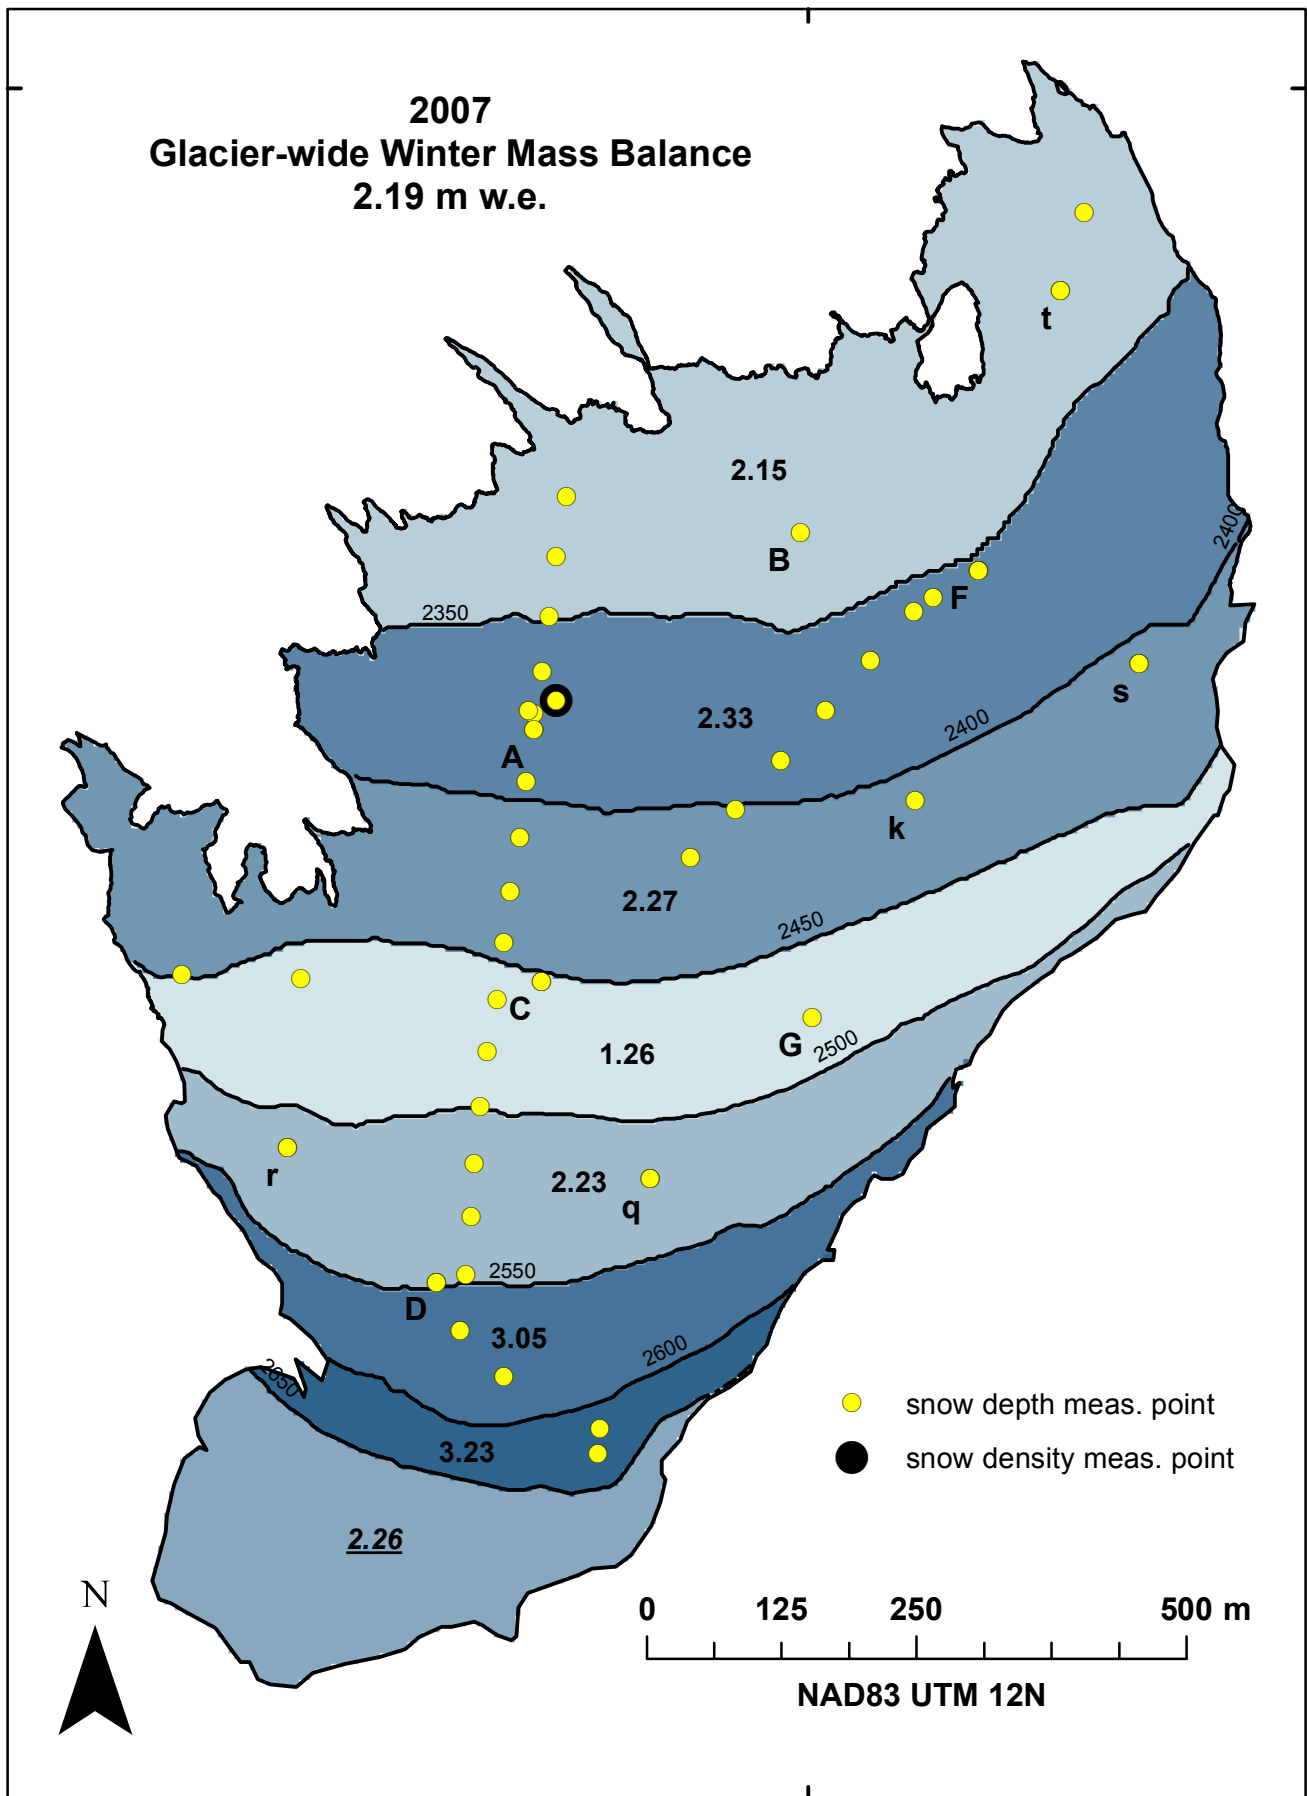

297000 000000

5390000 000000

5390000 000000

297000 000000

297000 000000

5390000 000000

5390000 000000

**2008  
Glacier-wide Winter Mass Balance  
2.74 m w.e.**

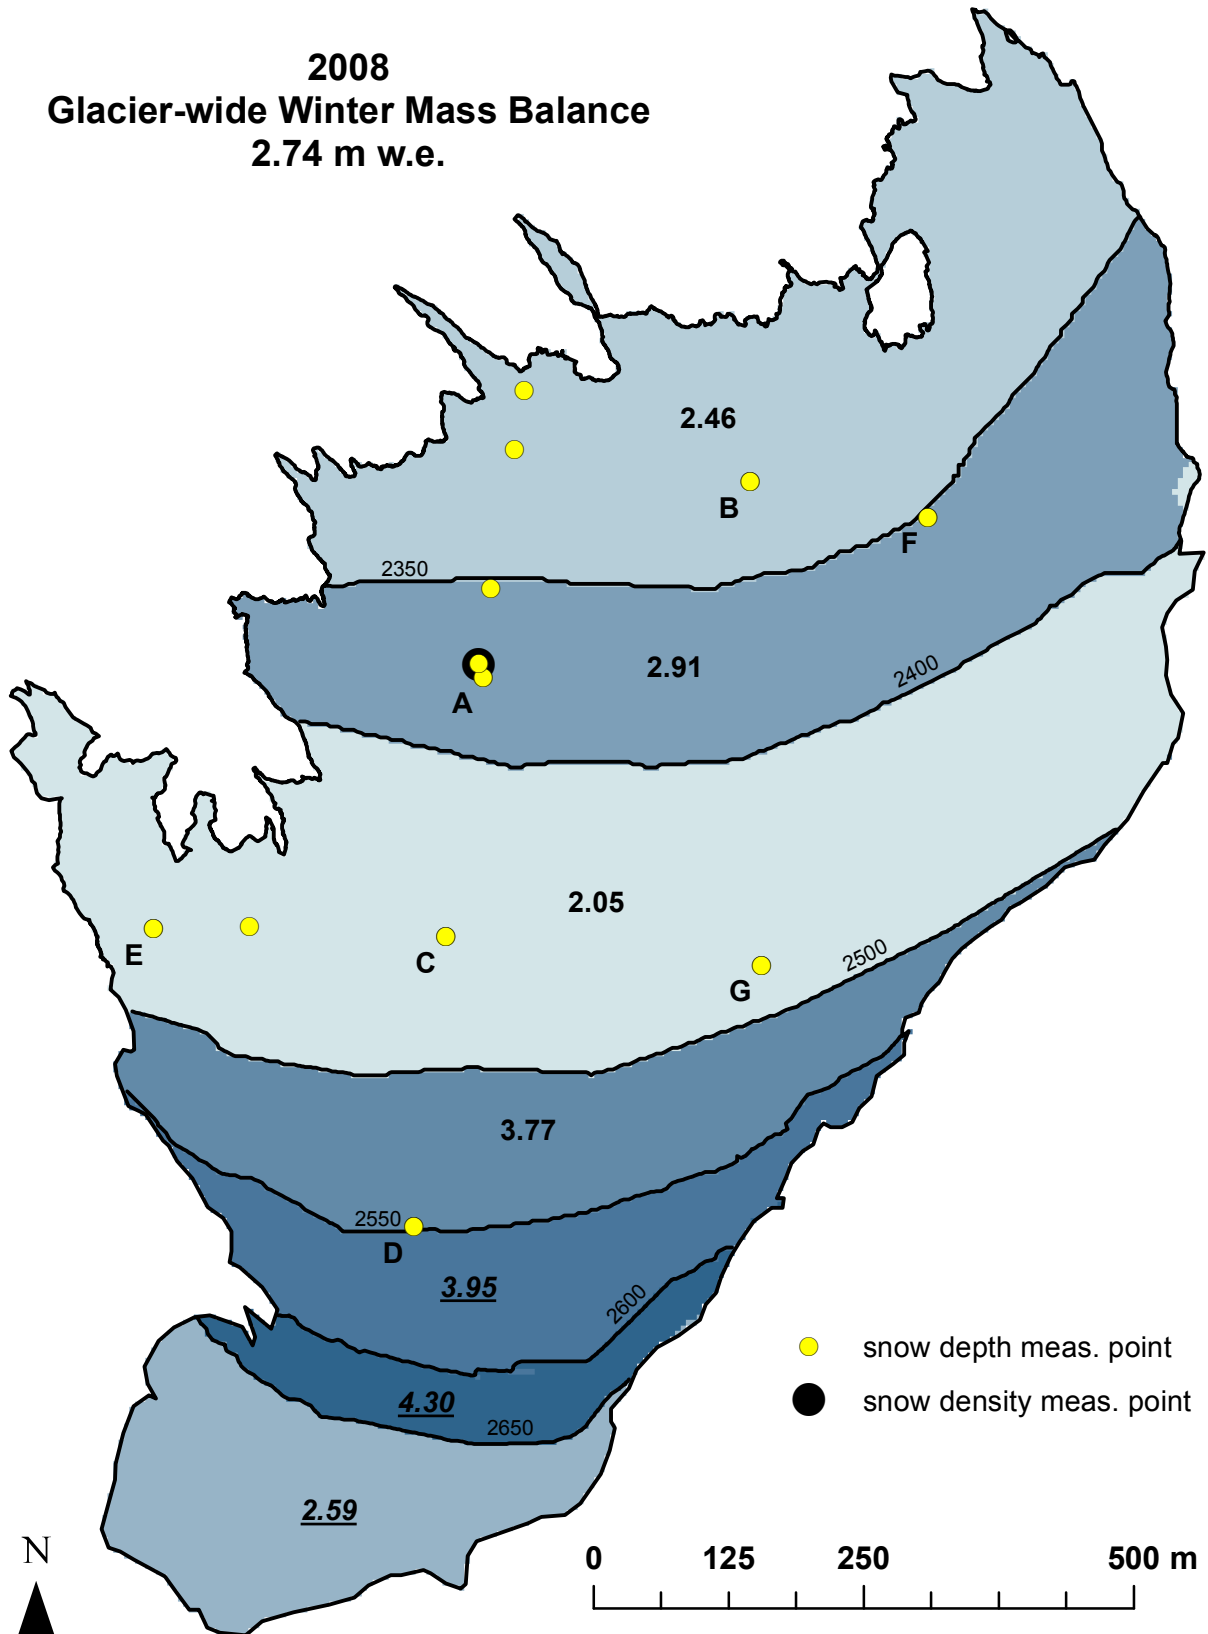

- snow depth meas. point
- snow density meas. point

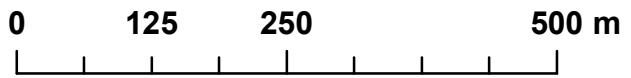

NAD83 UTM 12N

297000 000000

5390000 000000

297000 000000

5390000 000000

**2009  
Glacier-wide Winter Mass Balance  
2.46 m w.e.**

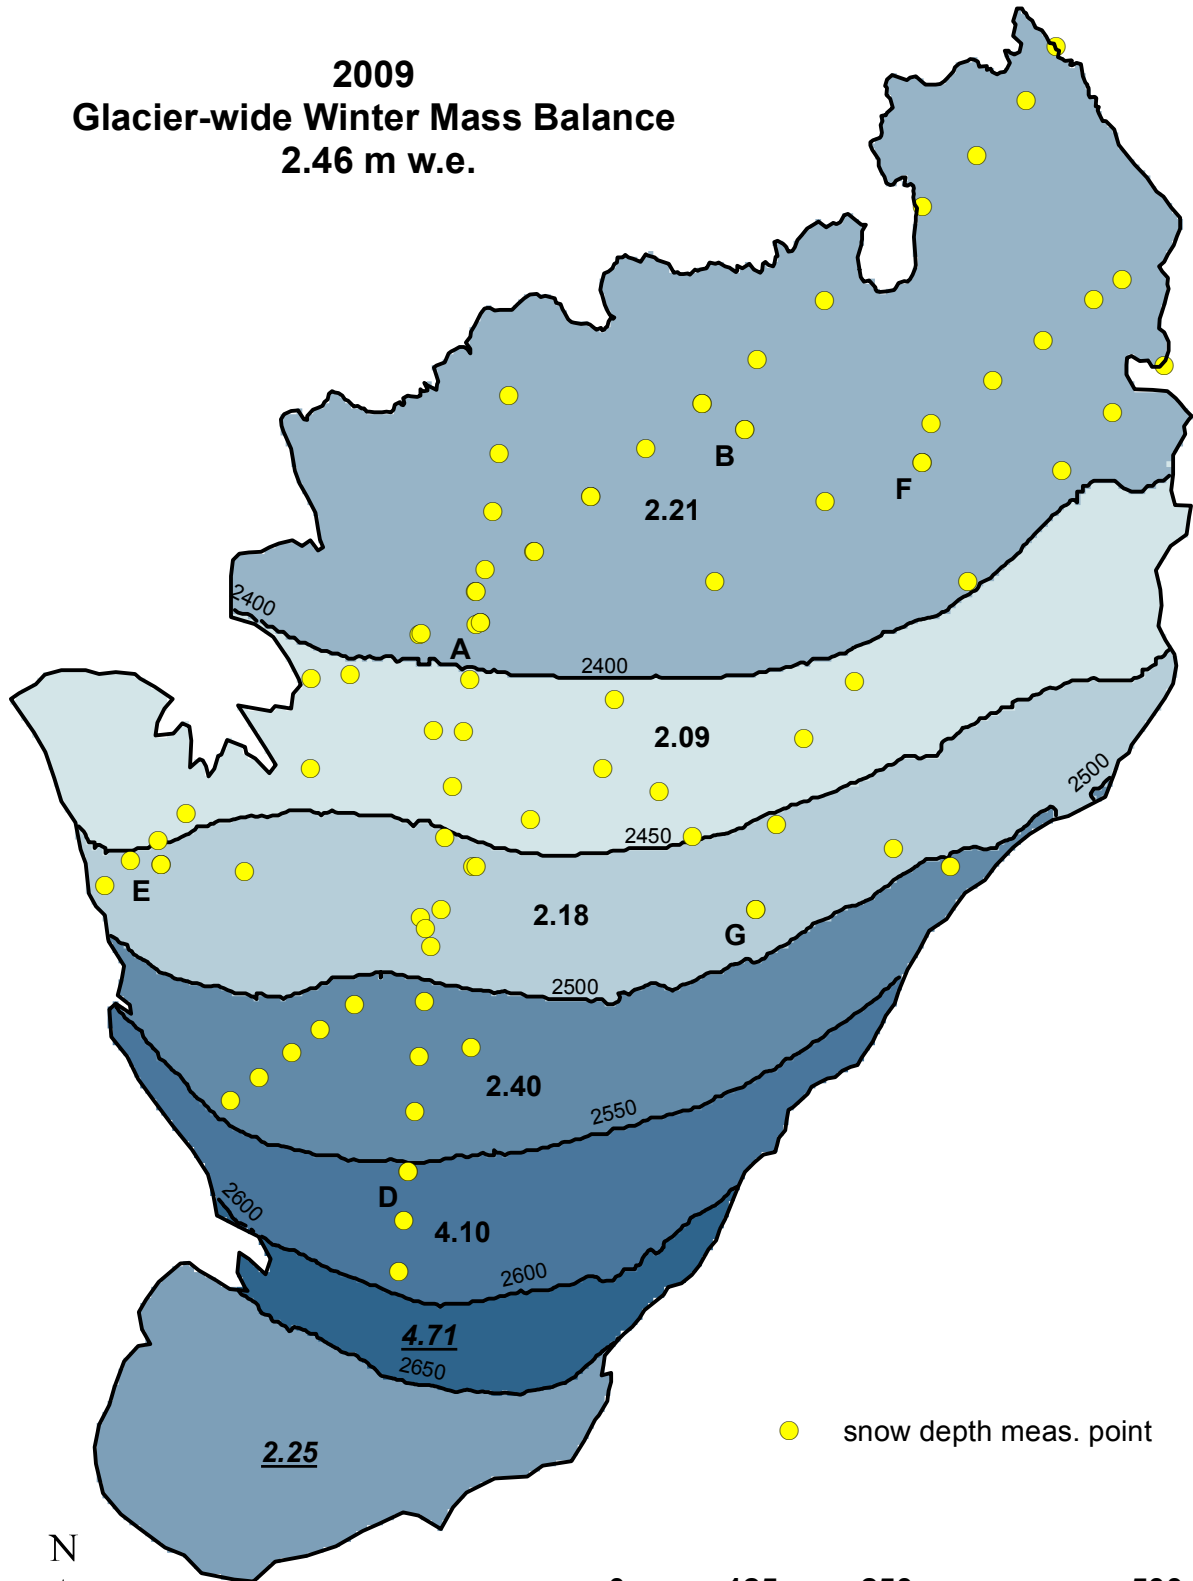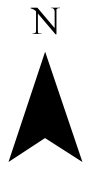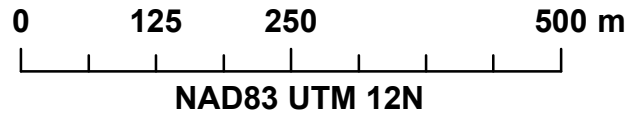

297000 000000

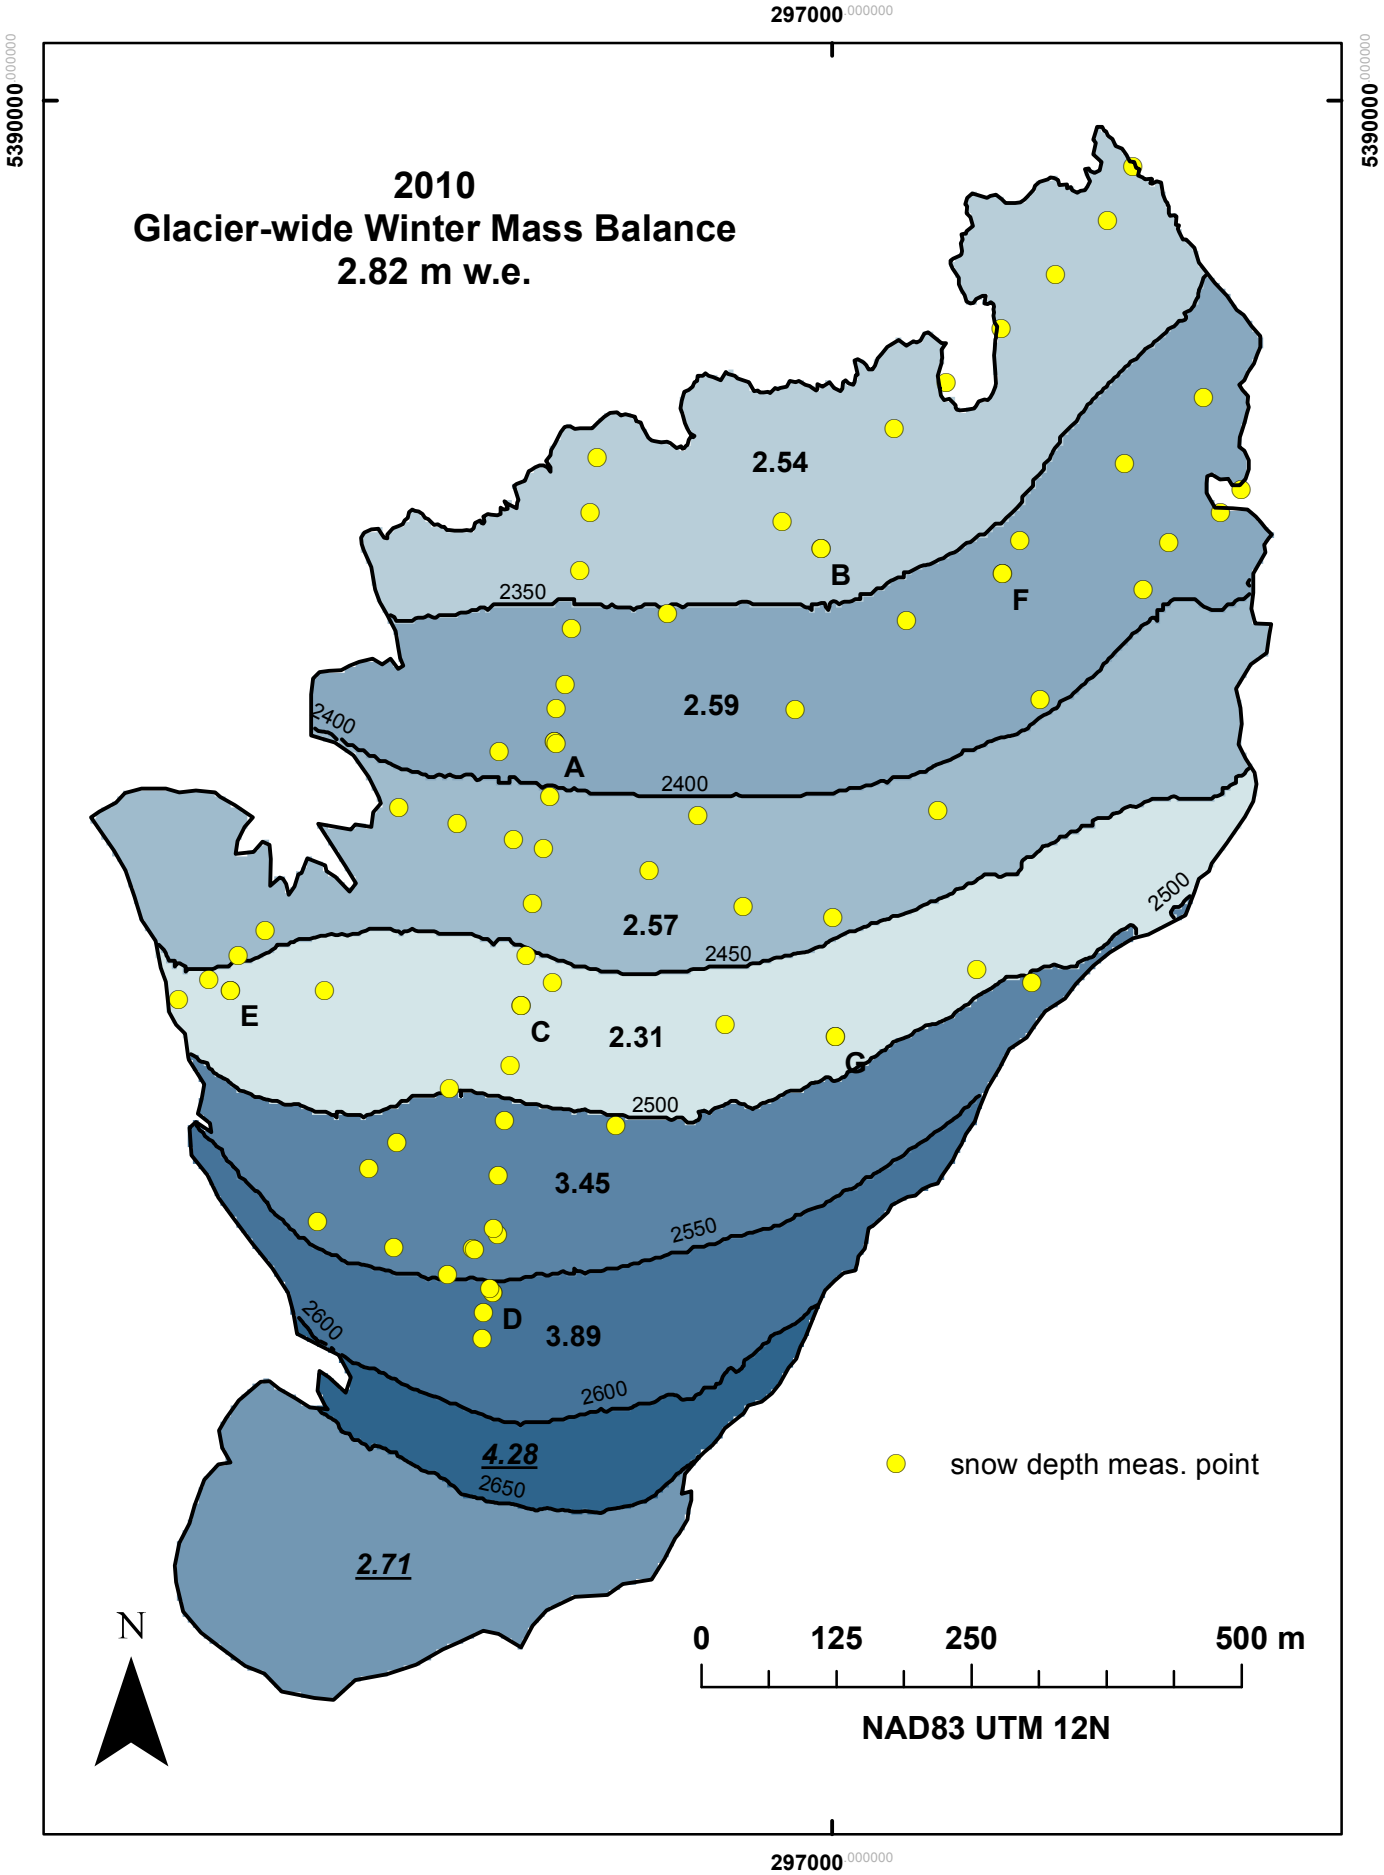



5390000

297000

5390000

# 2011 Glacier-wide Winter Mass Balance 4.13 m w.e.

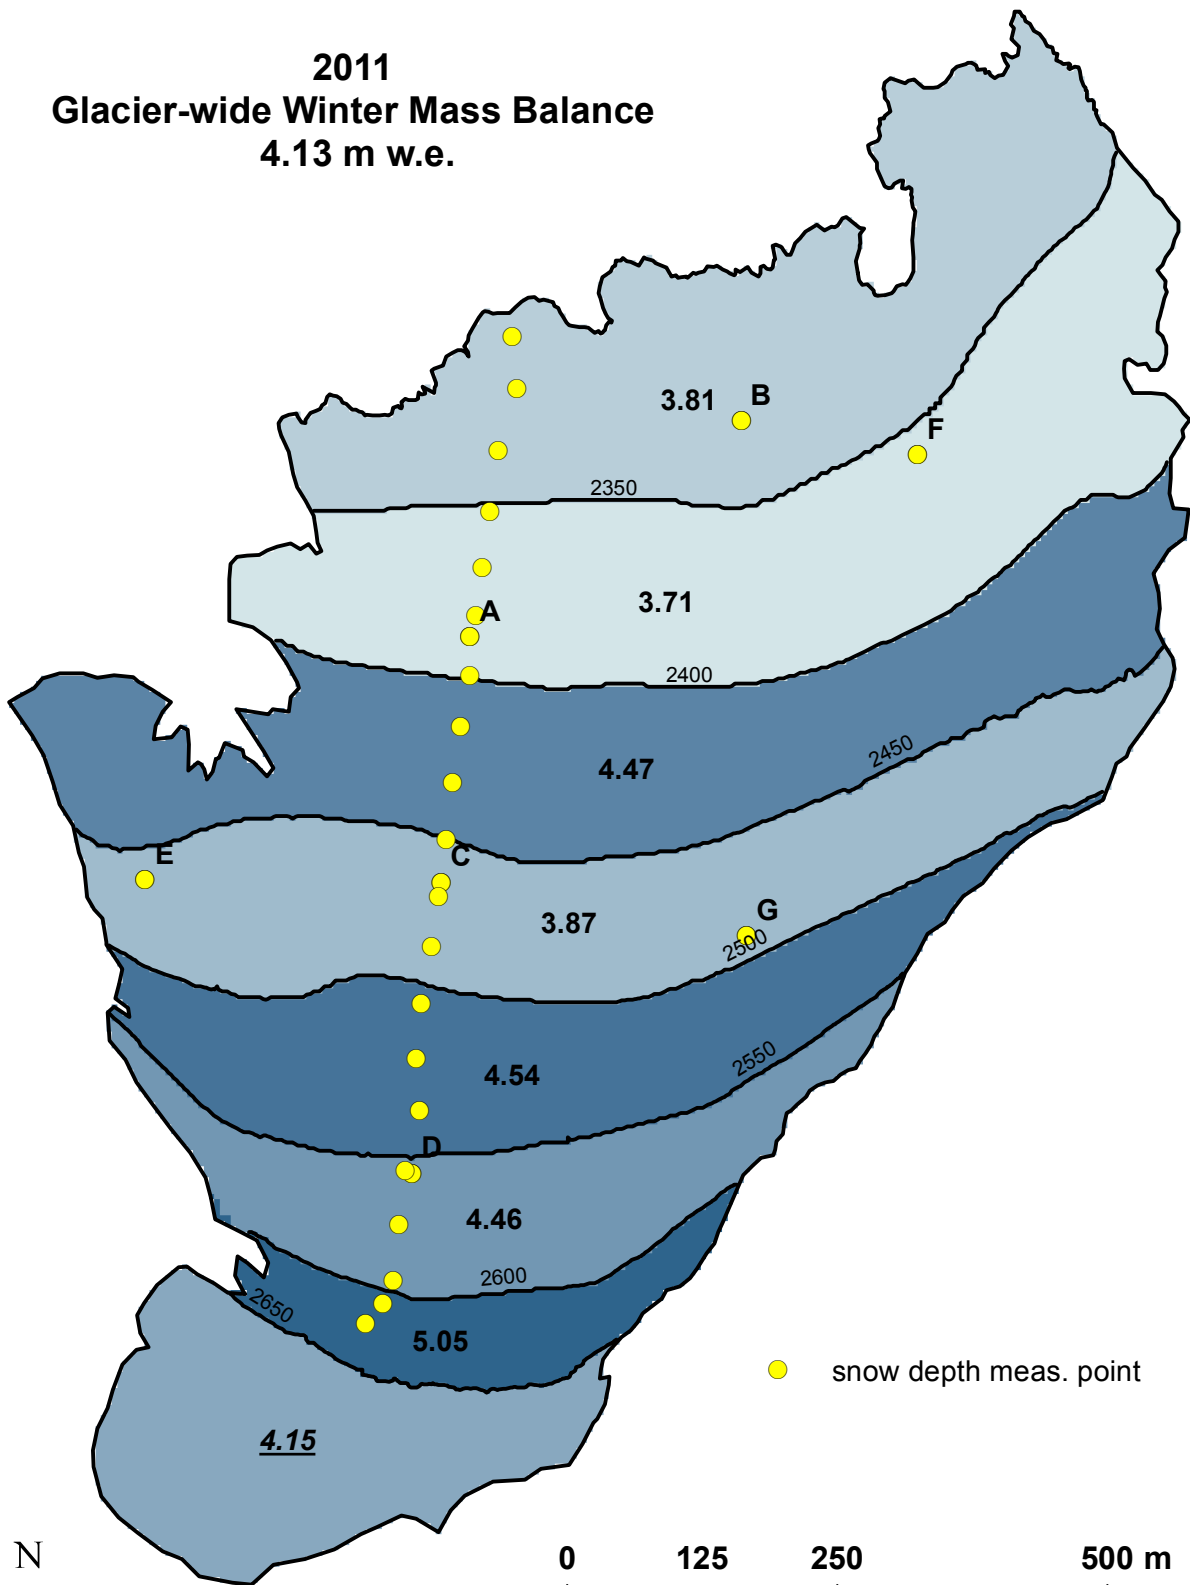

● snow depth meas. point

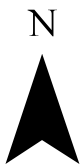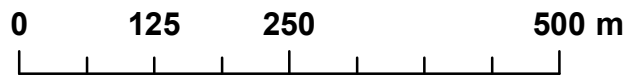

NAD83 UTM 12N

297000

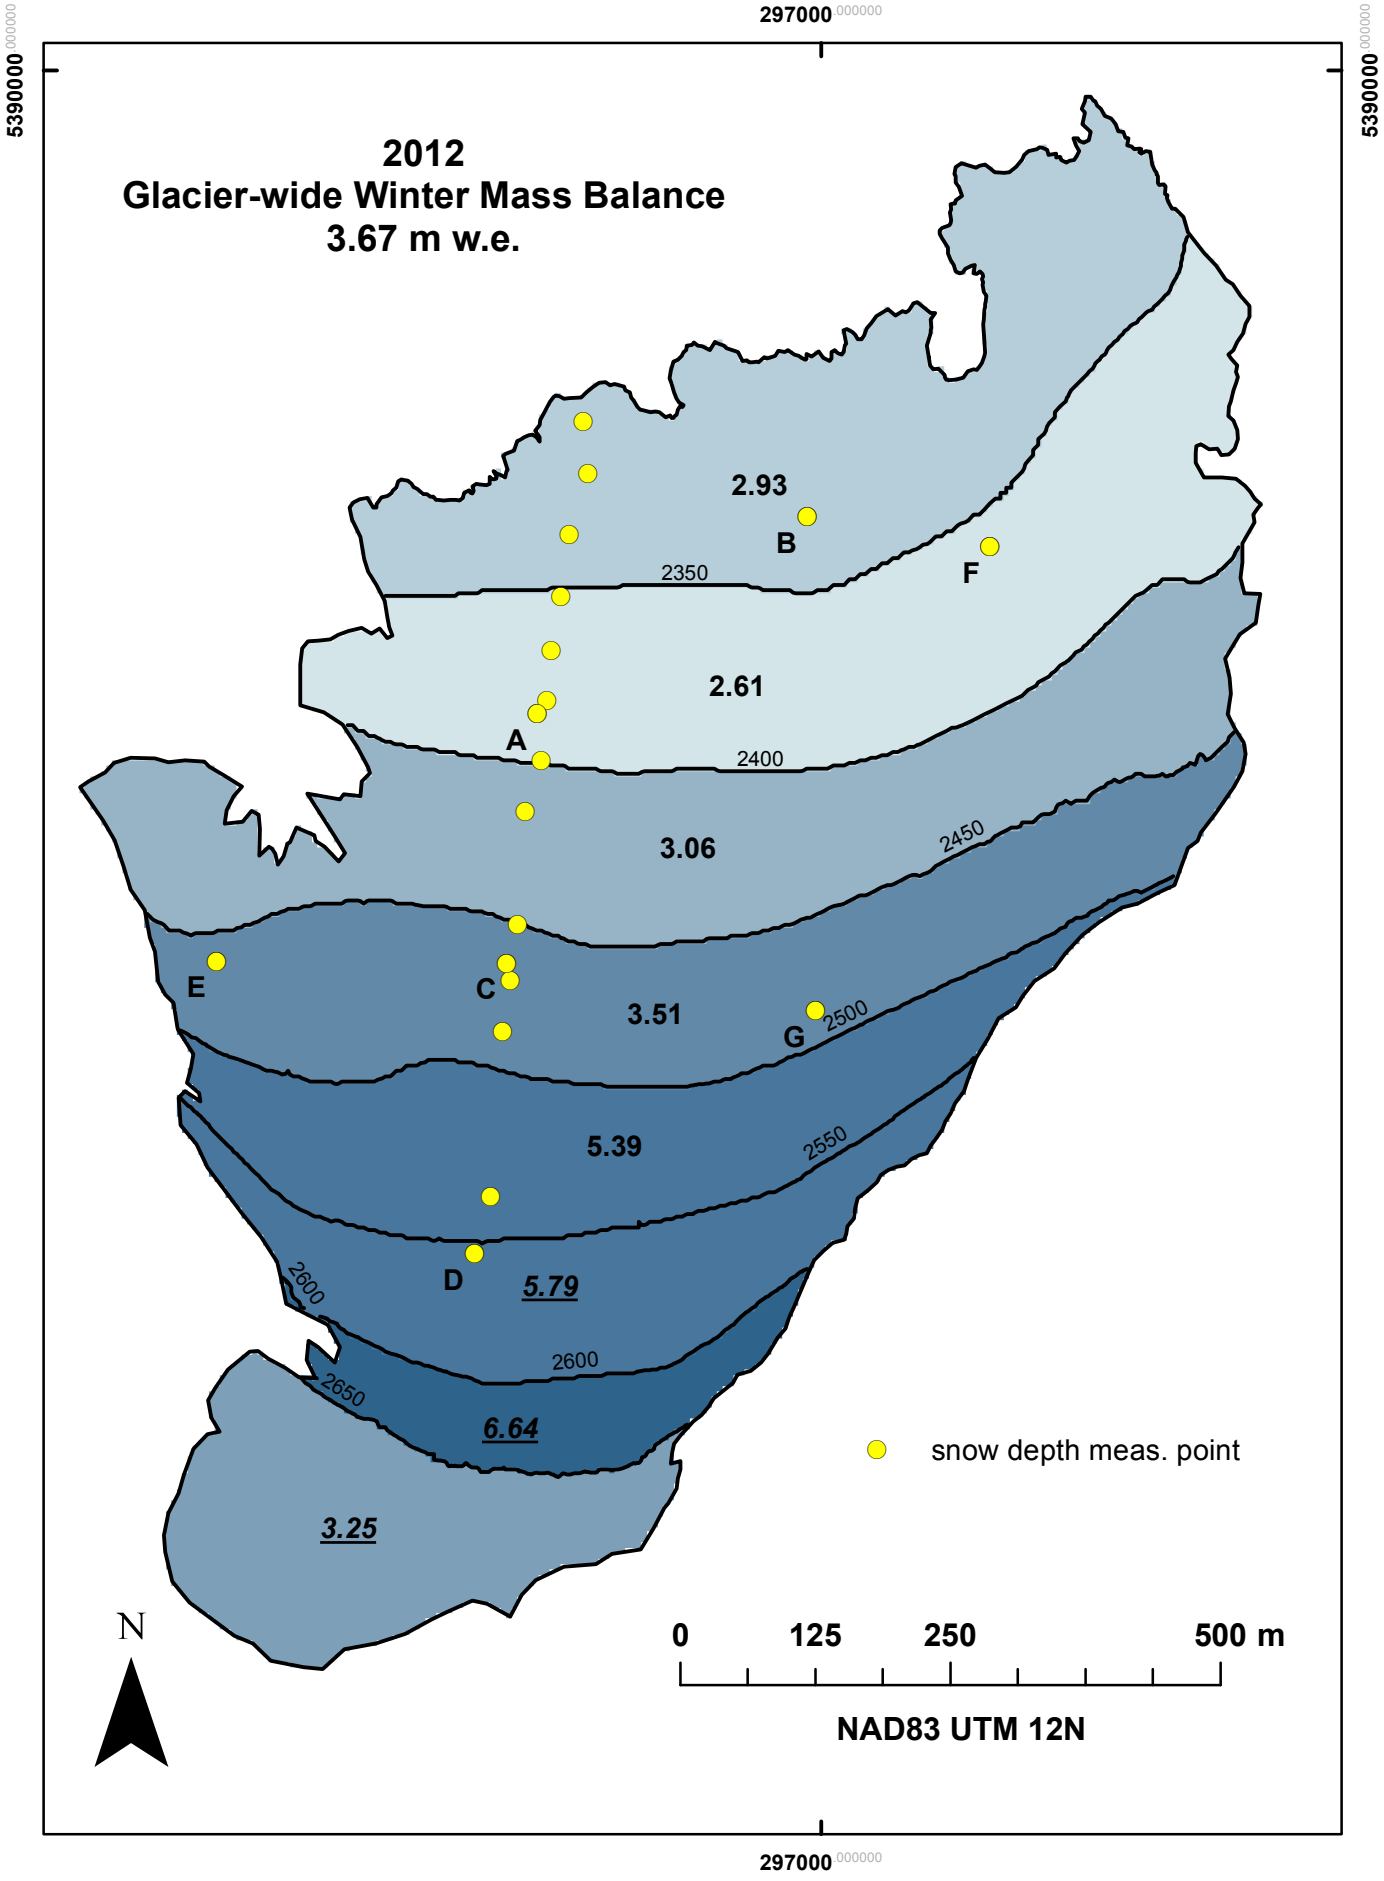

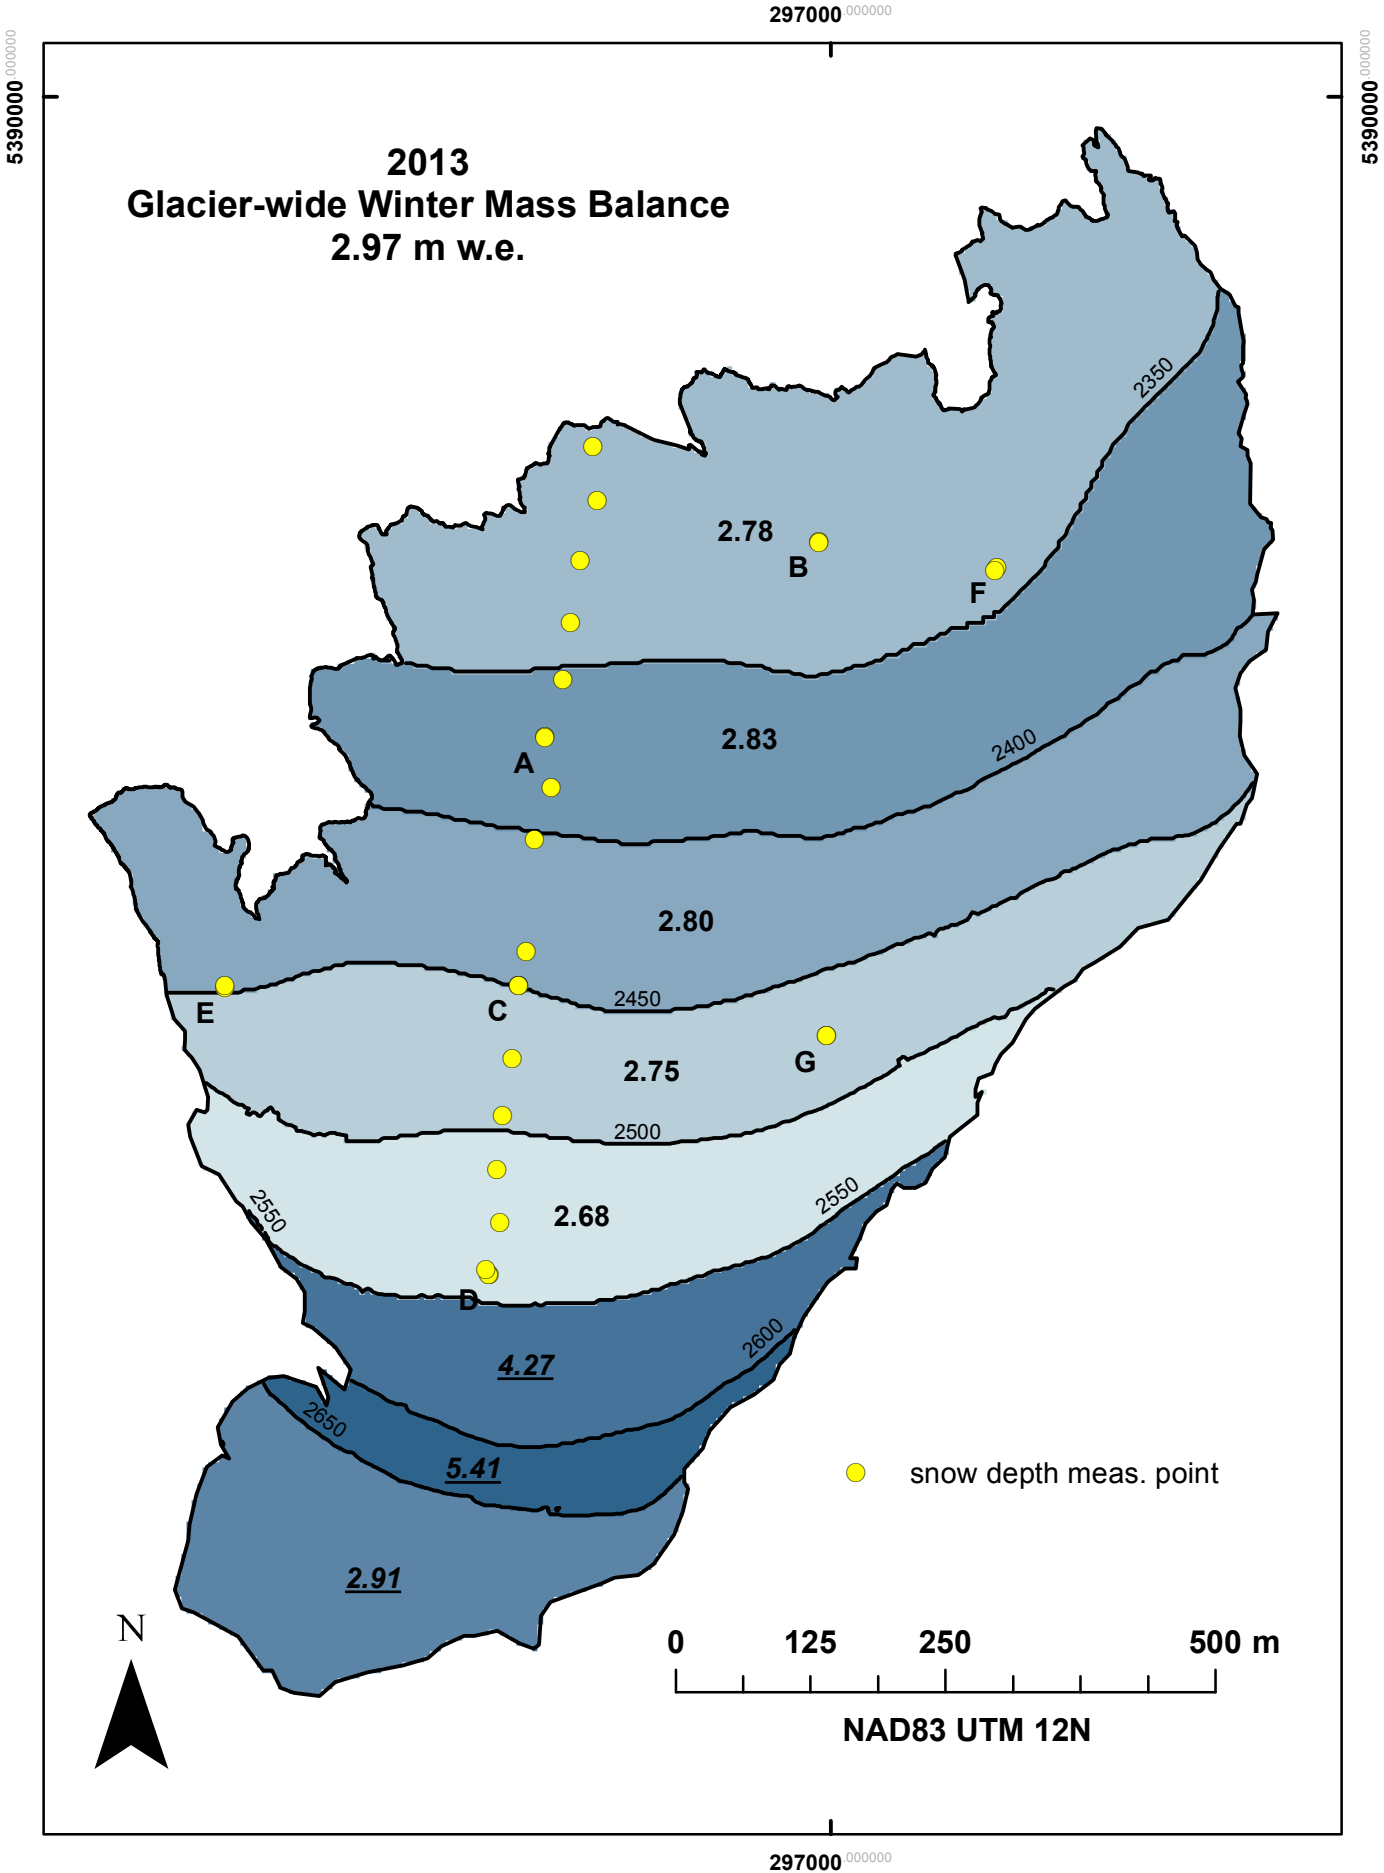

5390000 000000

297000 000000

5390000 000000

**2014  
Glacier-wide Winter Mass Balance  
3.19 m w.e.**

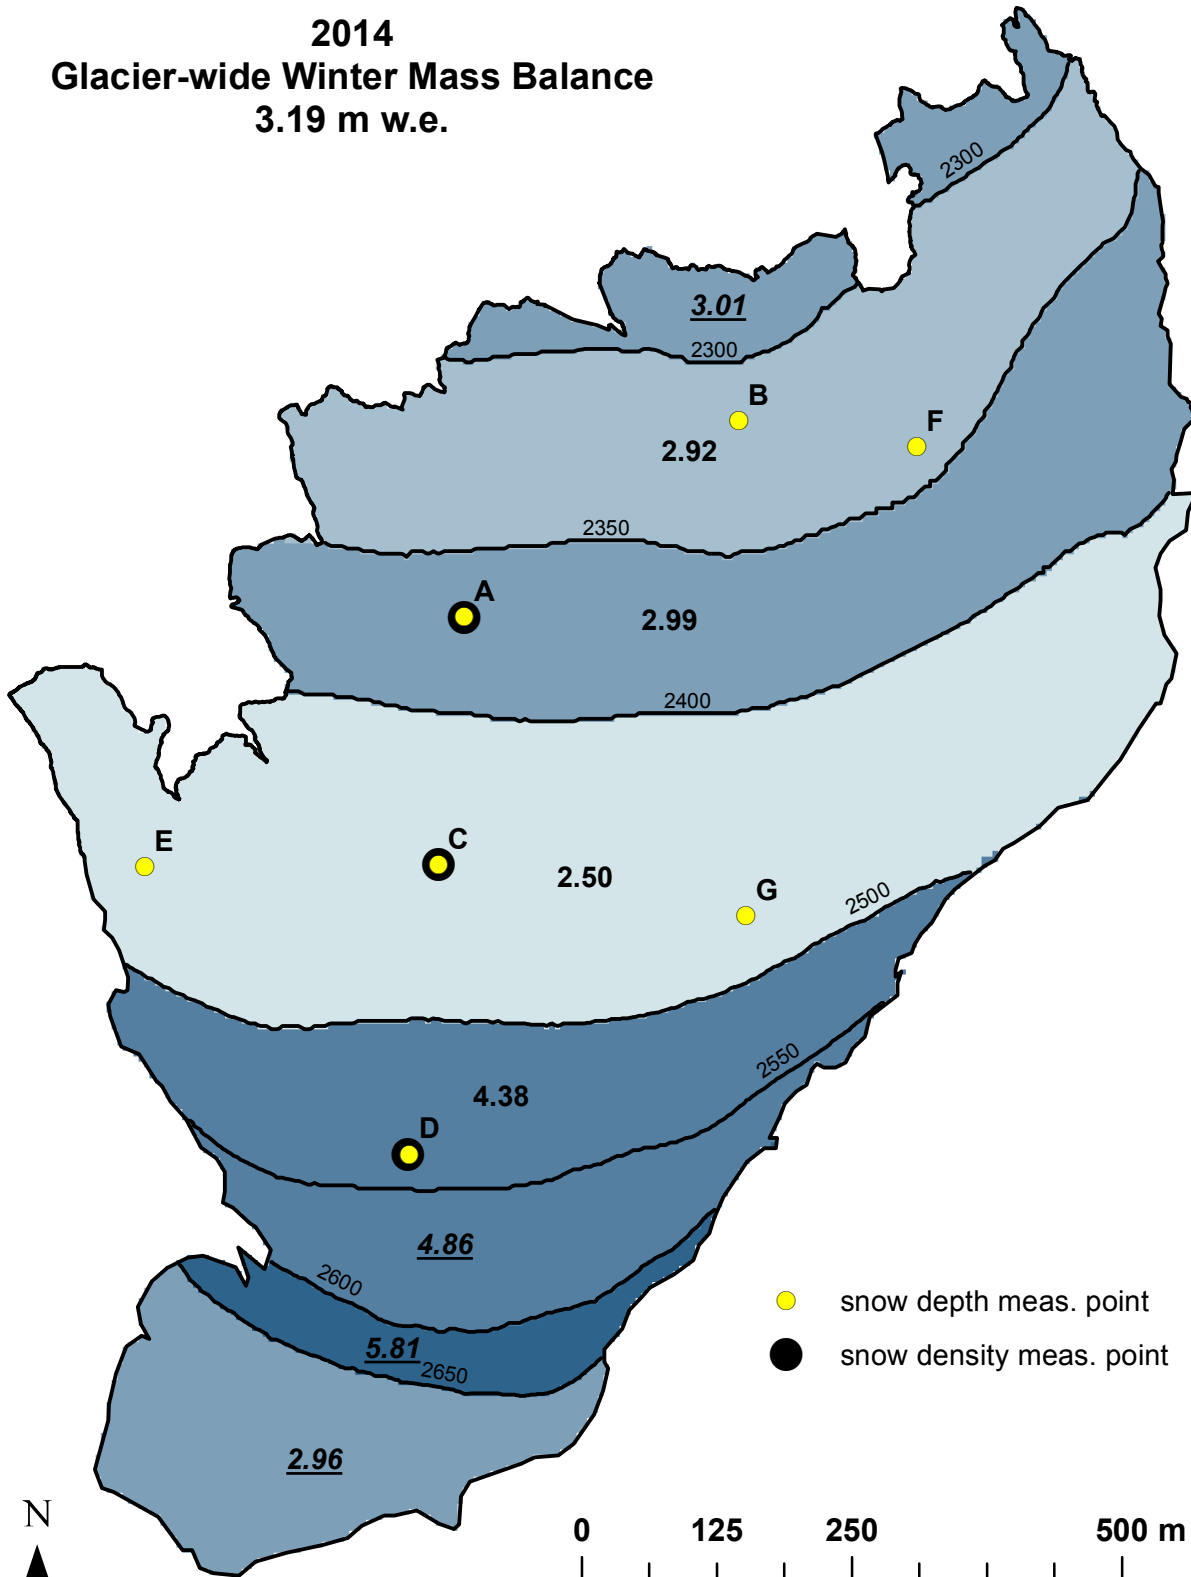

- snow depth meas. point
- snow density meas. point

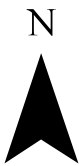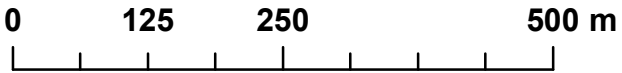

NAD83 UTM 12N

297000 000000

297000 000000

# 2015 Glacier-wide Winter Mass Balance 2.79

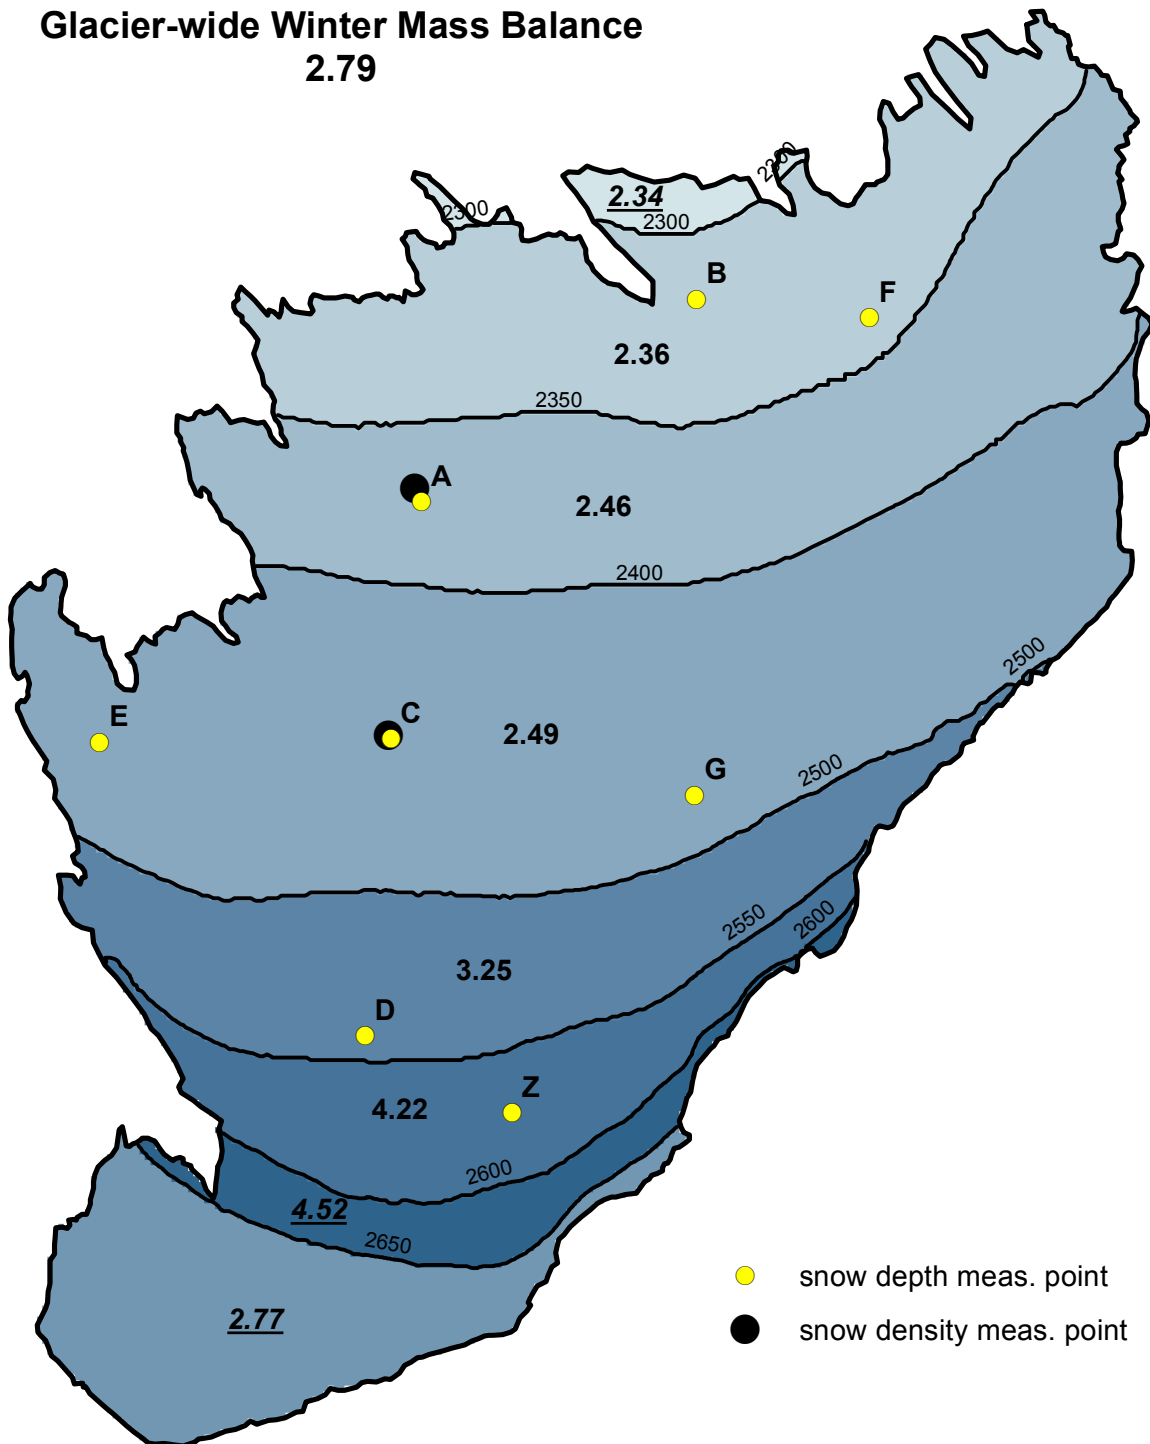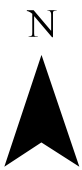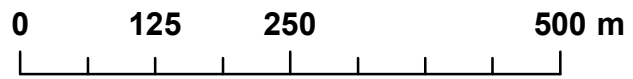

NAD 83 UTM 12N

297000 000000

297000.000000

5390000.000000

5390000.000000

### 2005 Glacier-wide Summer Mass Balance -3.25 m w.e.

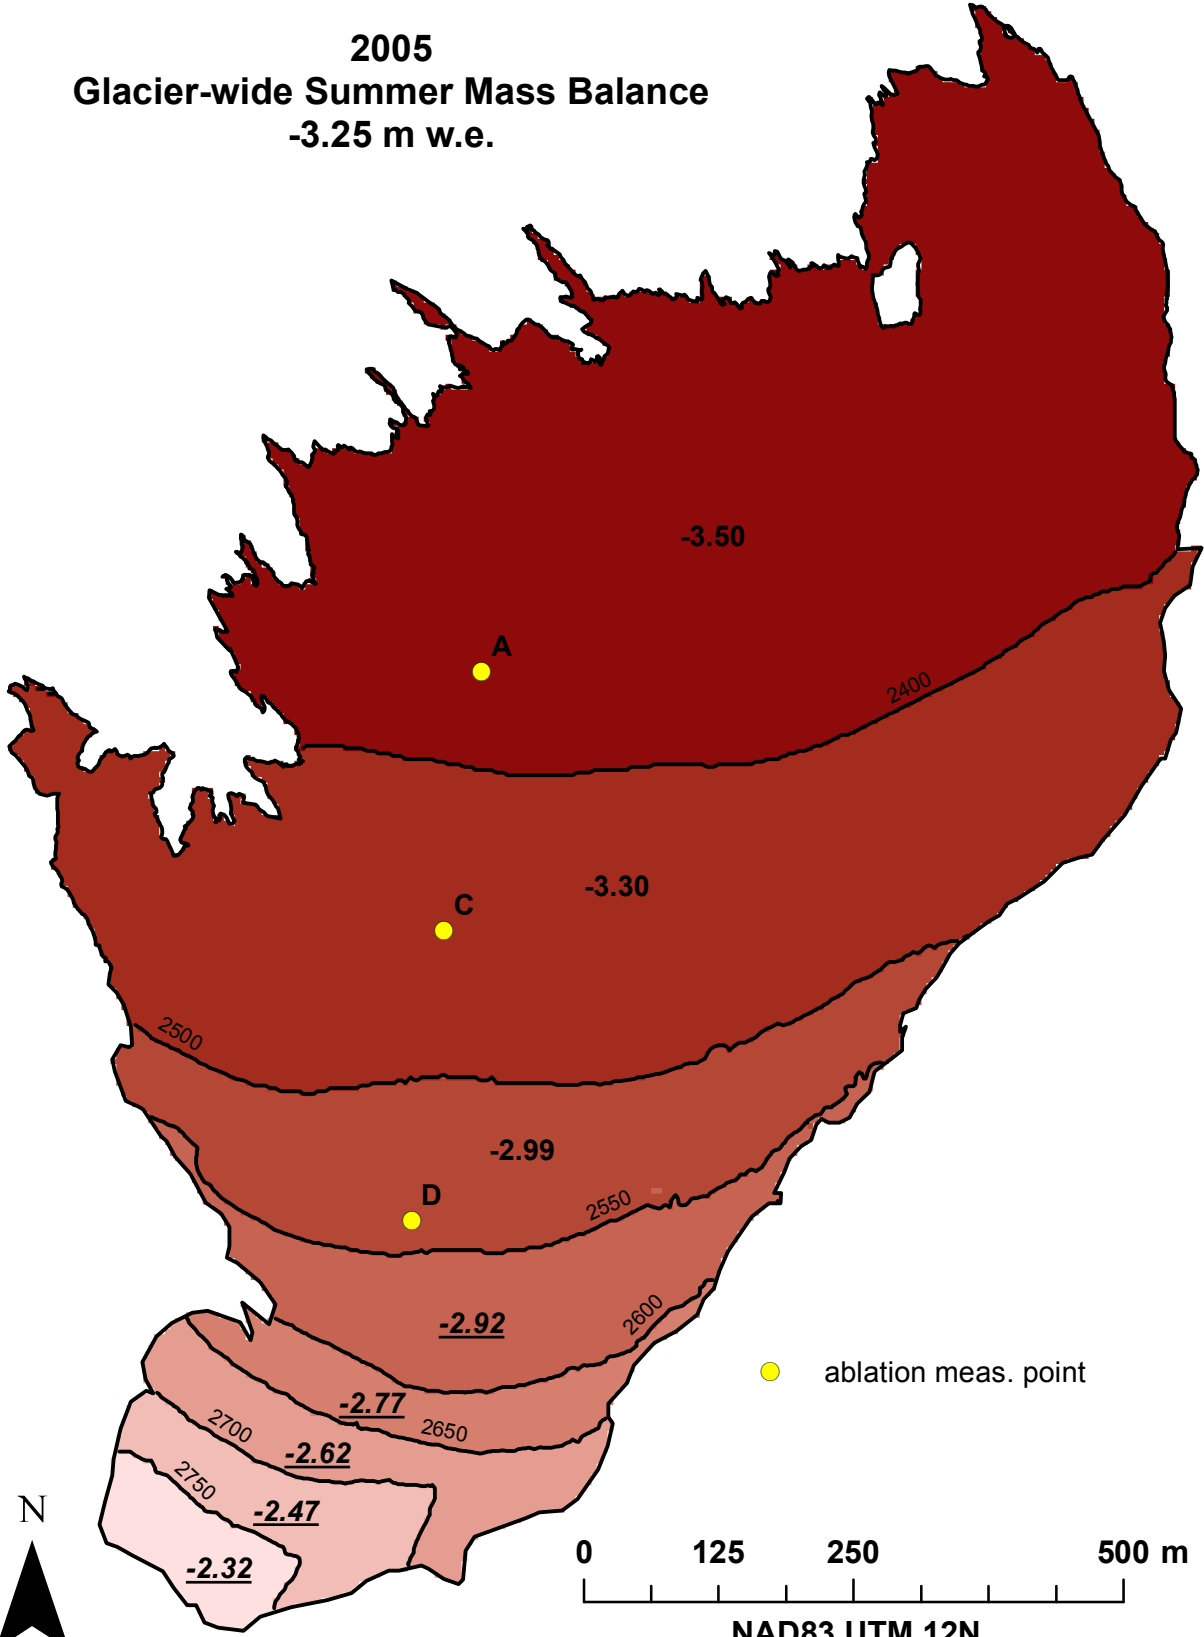

● ablation meas. point

0 125 250 500 m  
NAD83 UTM 12N

297000.000000

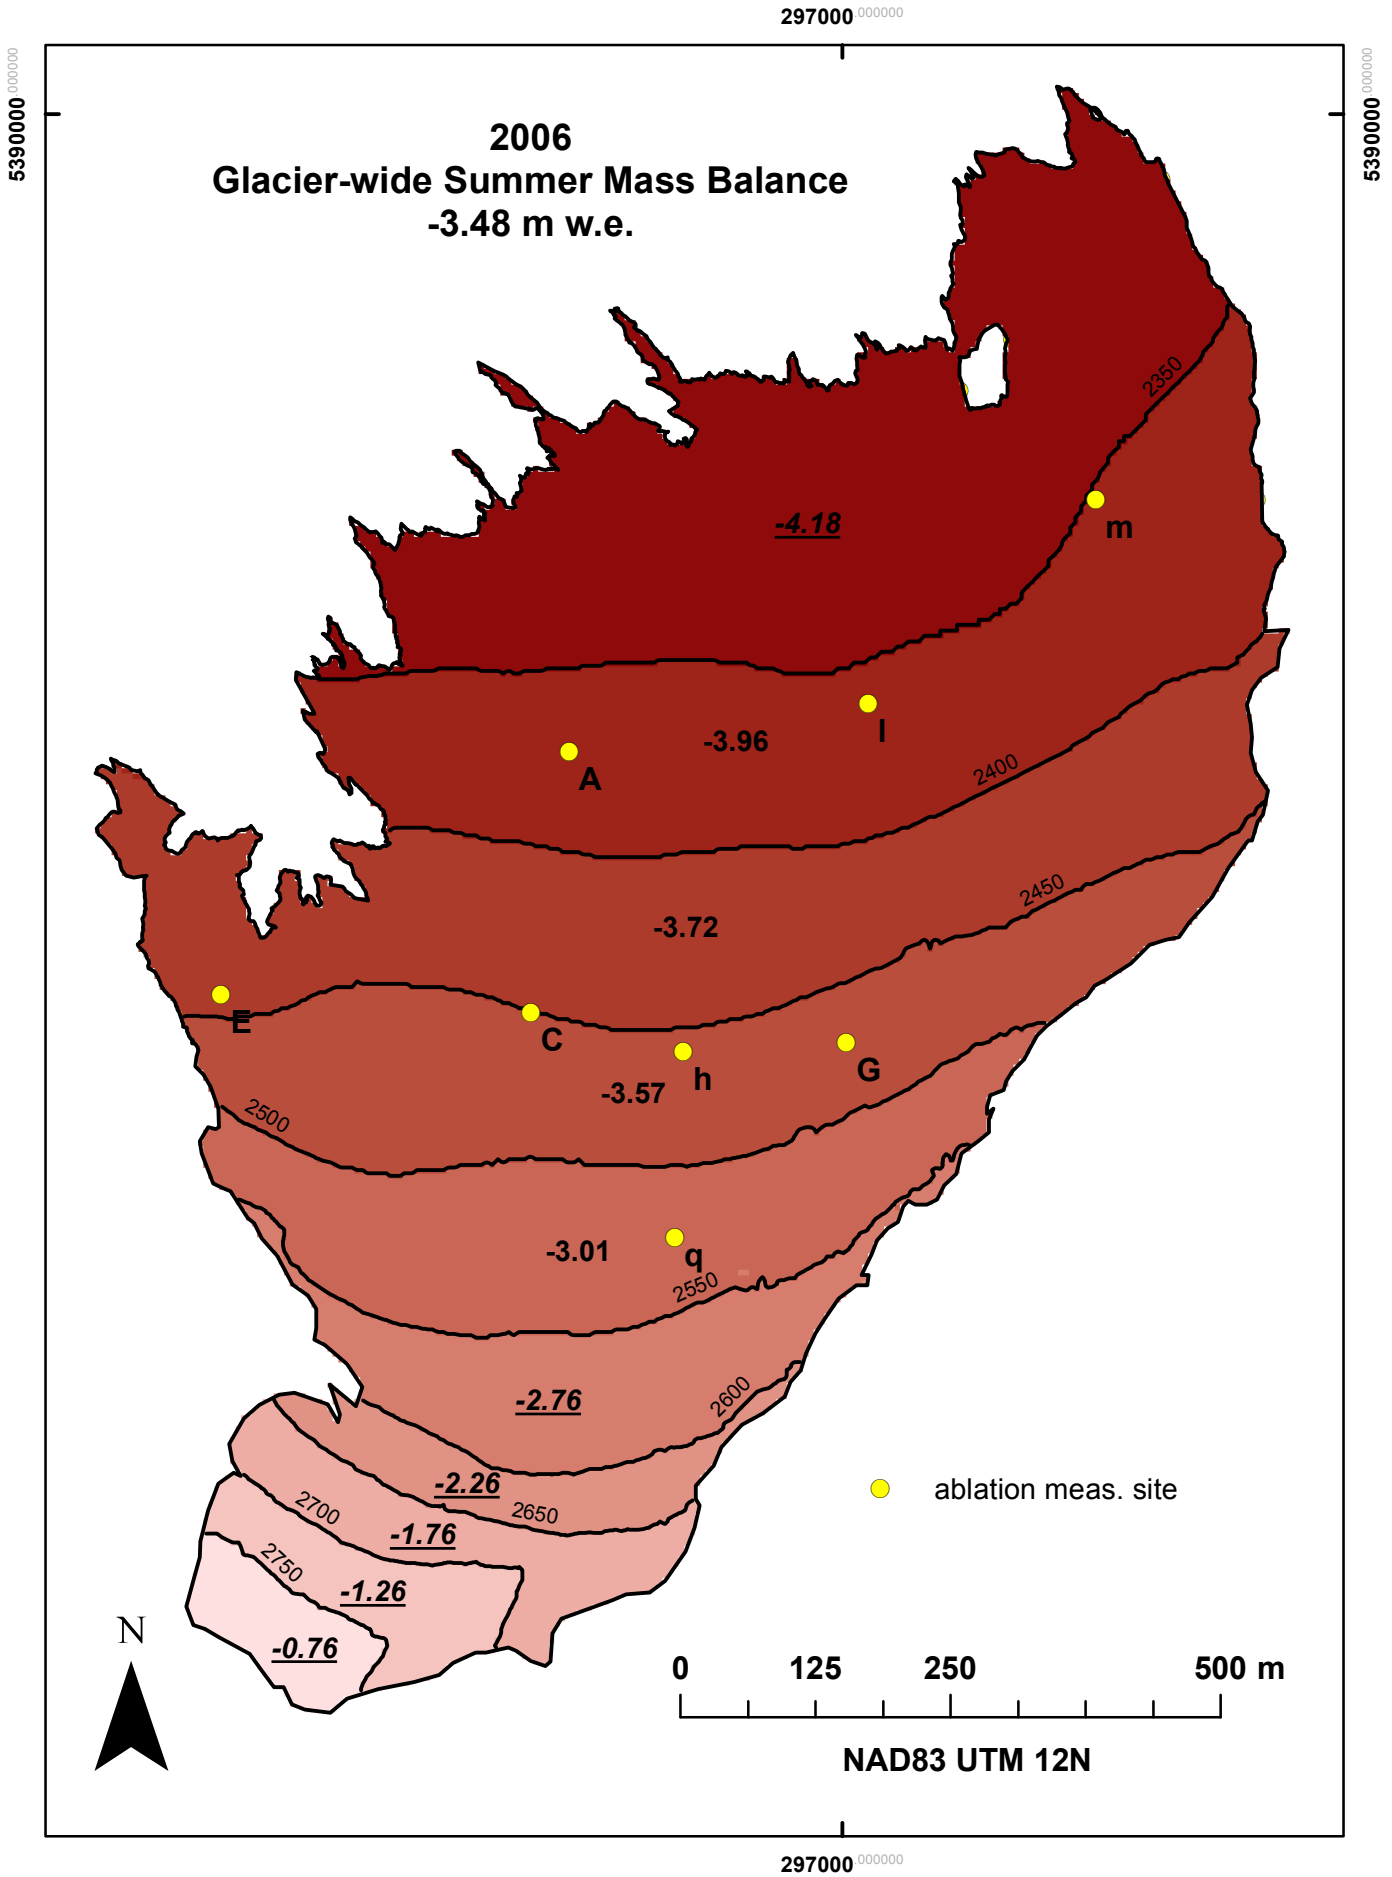

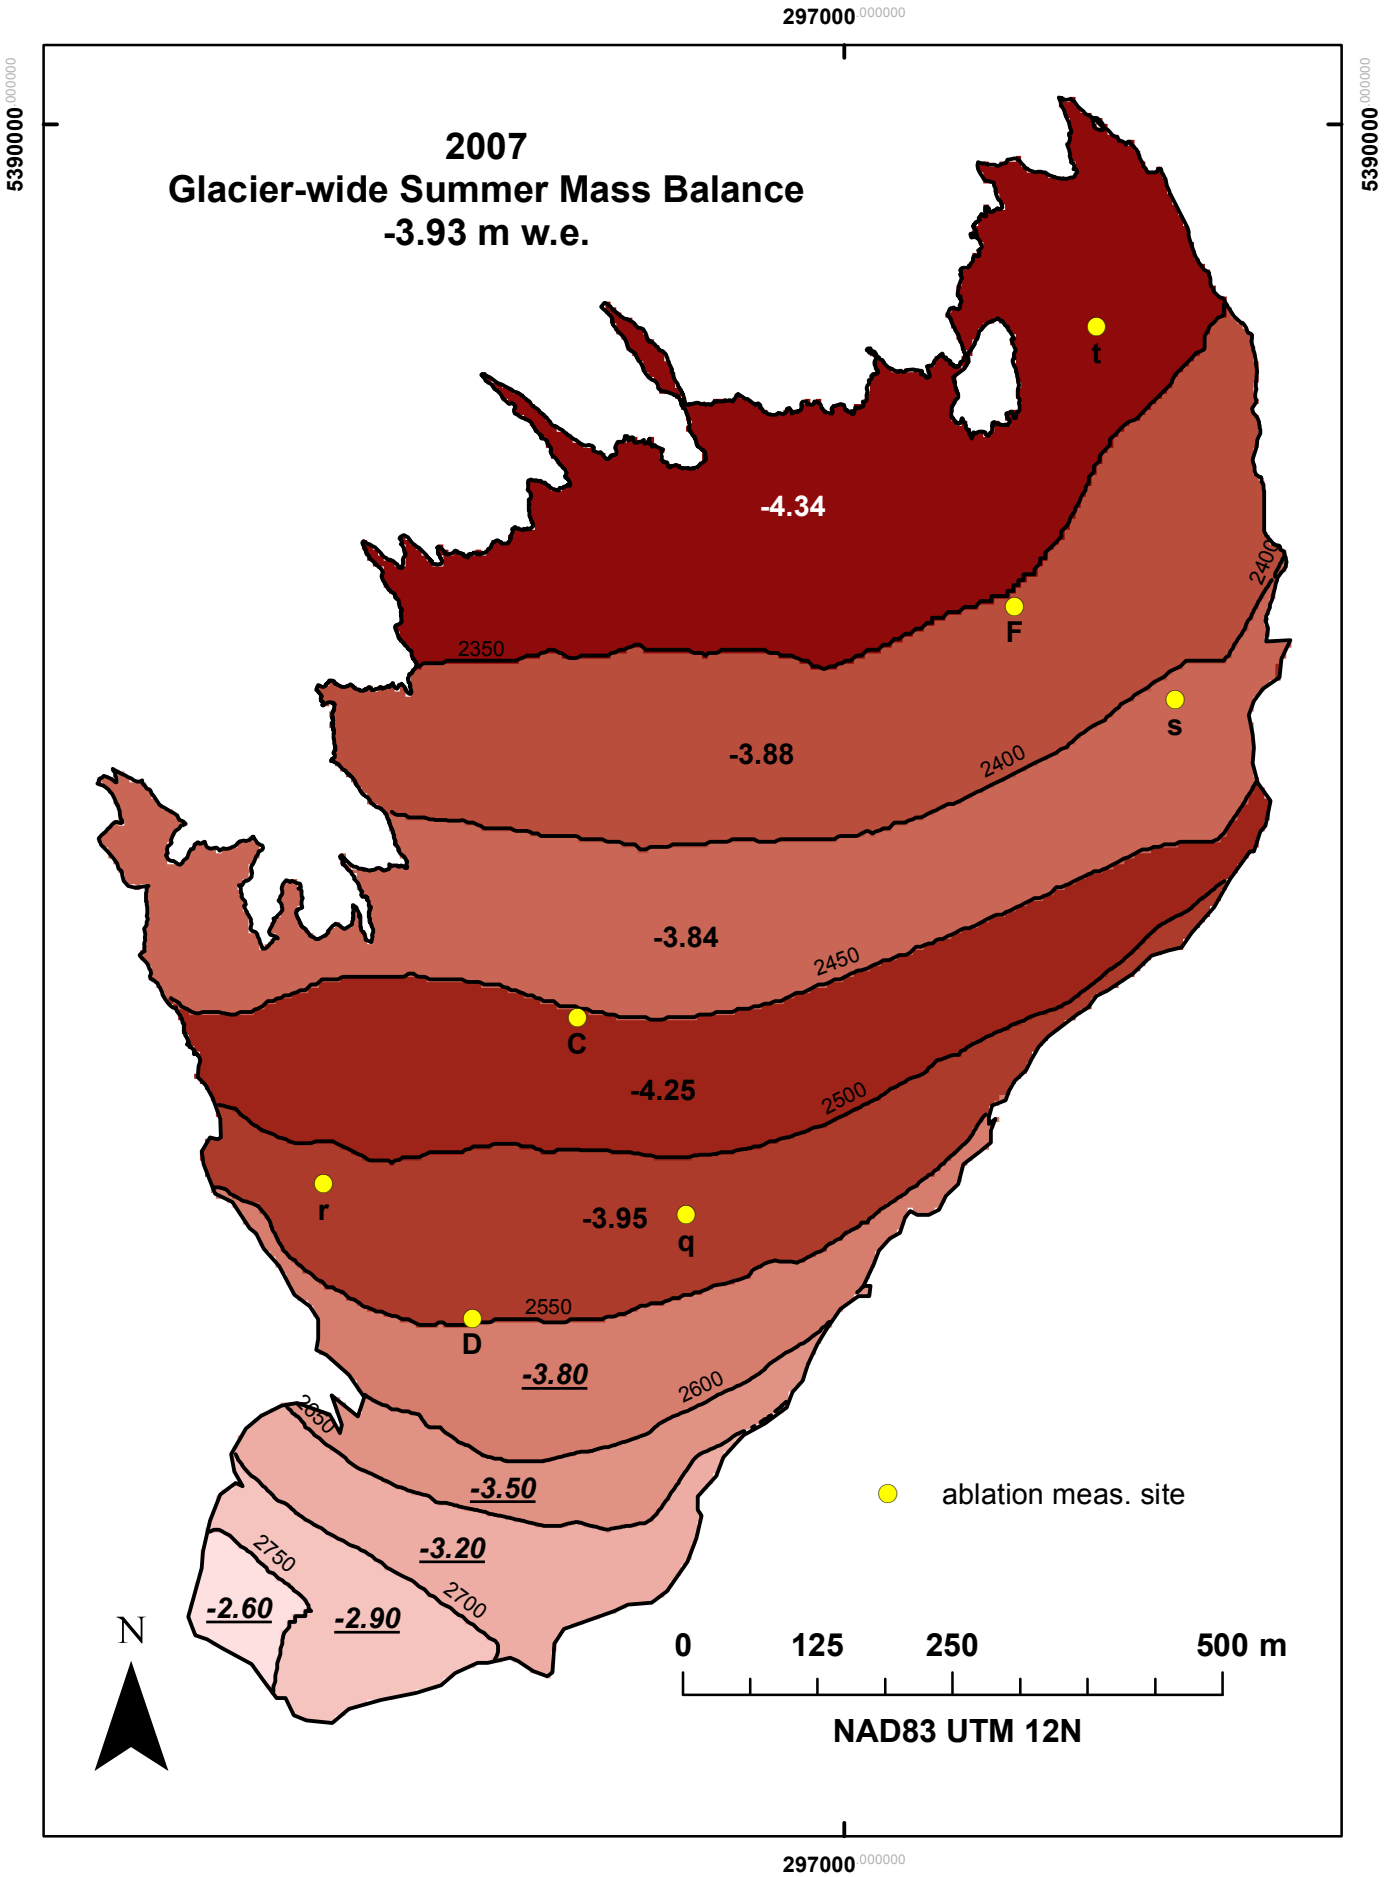



297000 000000

5390000 0000000

5390000 0000000

# 2008 Glacier-wide Summer Mass Balance -2.11 m w.e.

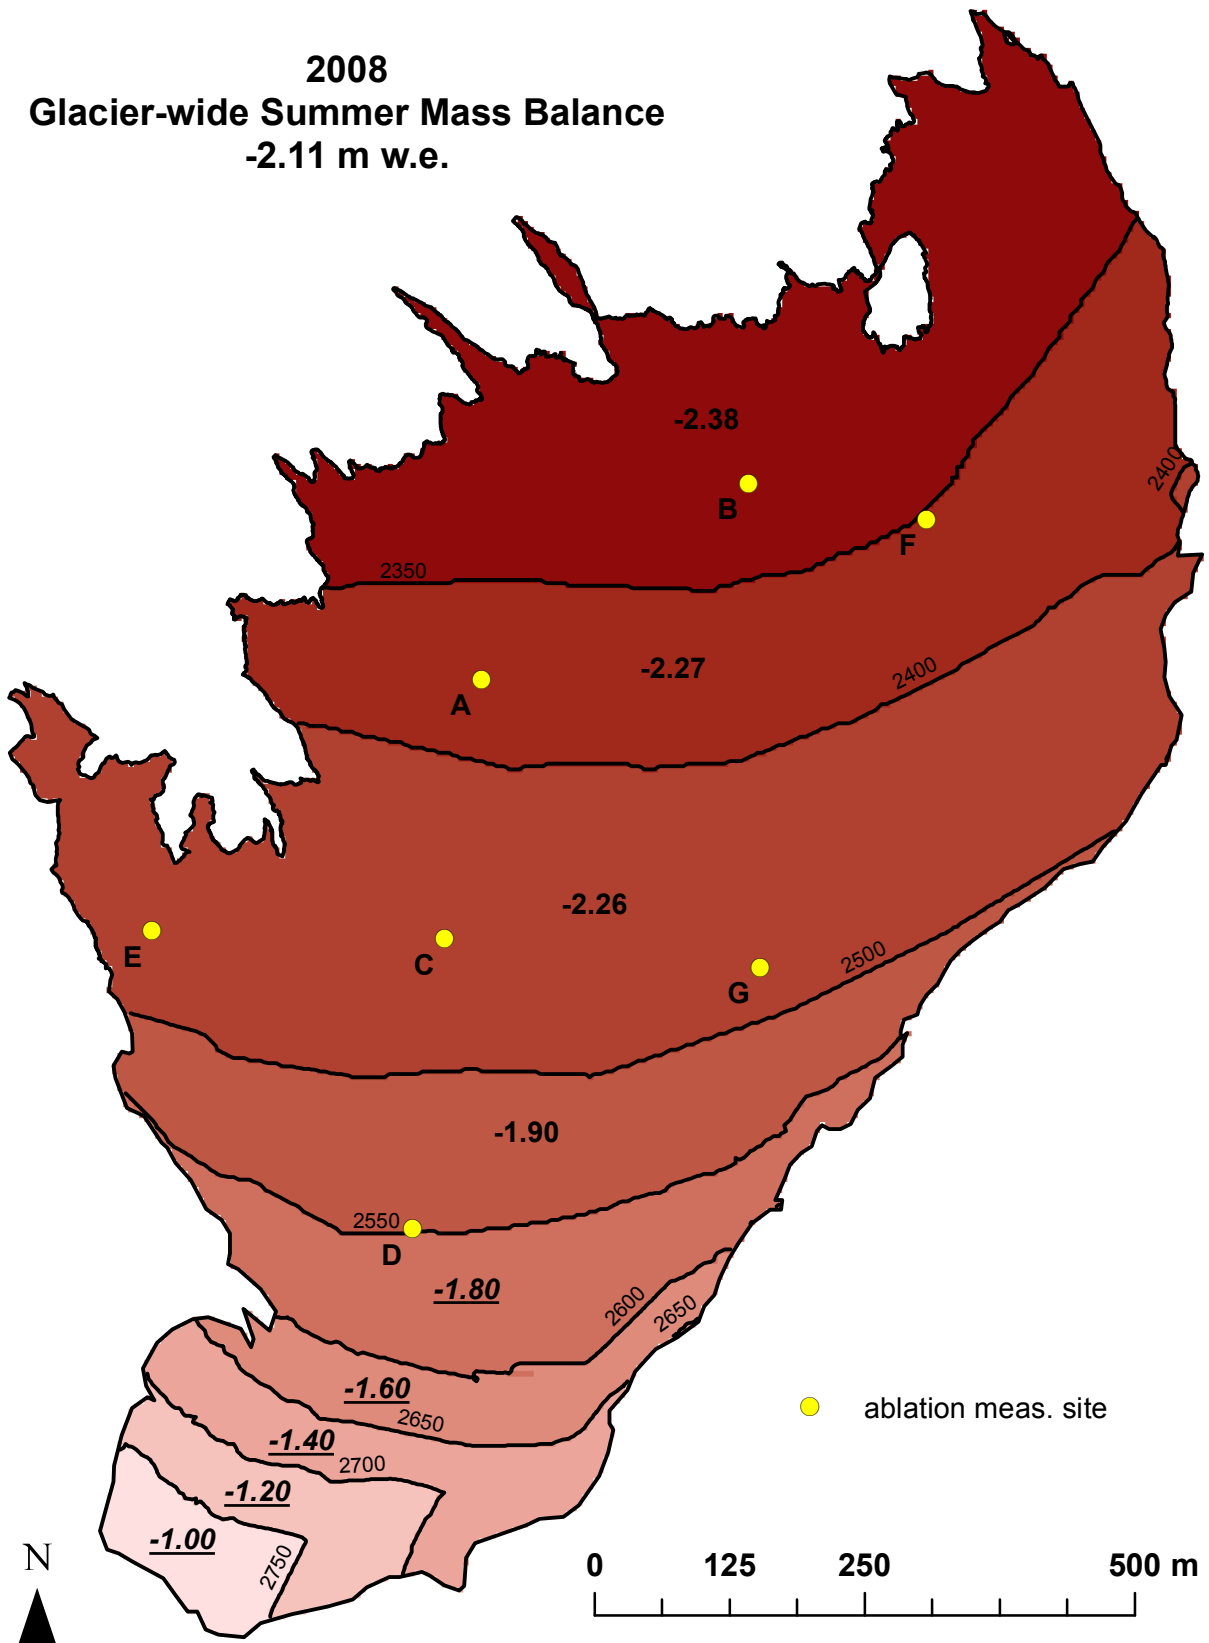

● ablation meas. site

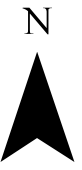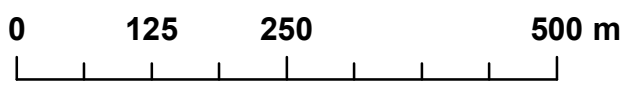

NAD83 UTM 12N

297000 000000

5390000.000000

297000.000000

5390000.000000

# 2009 Glacier-wide Summer Mass Balance -3.86 m w.e.

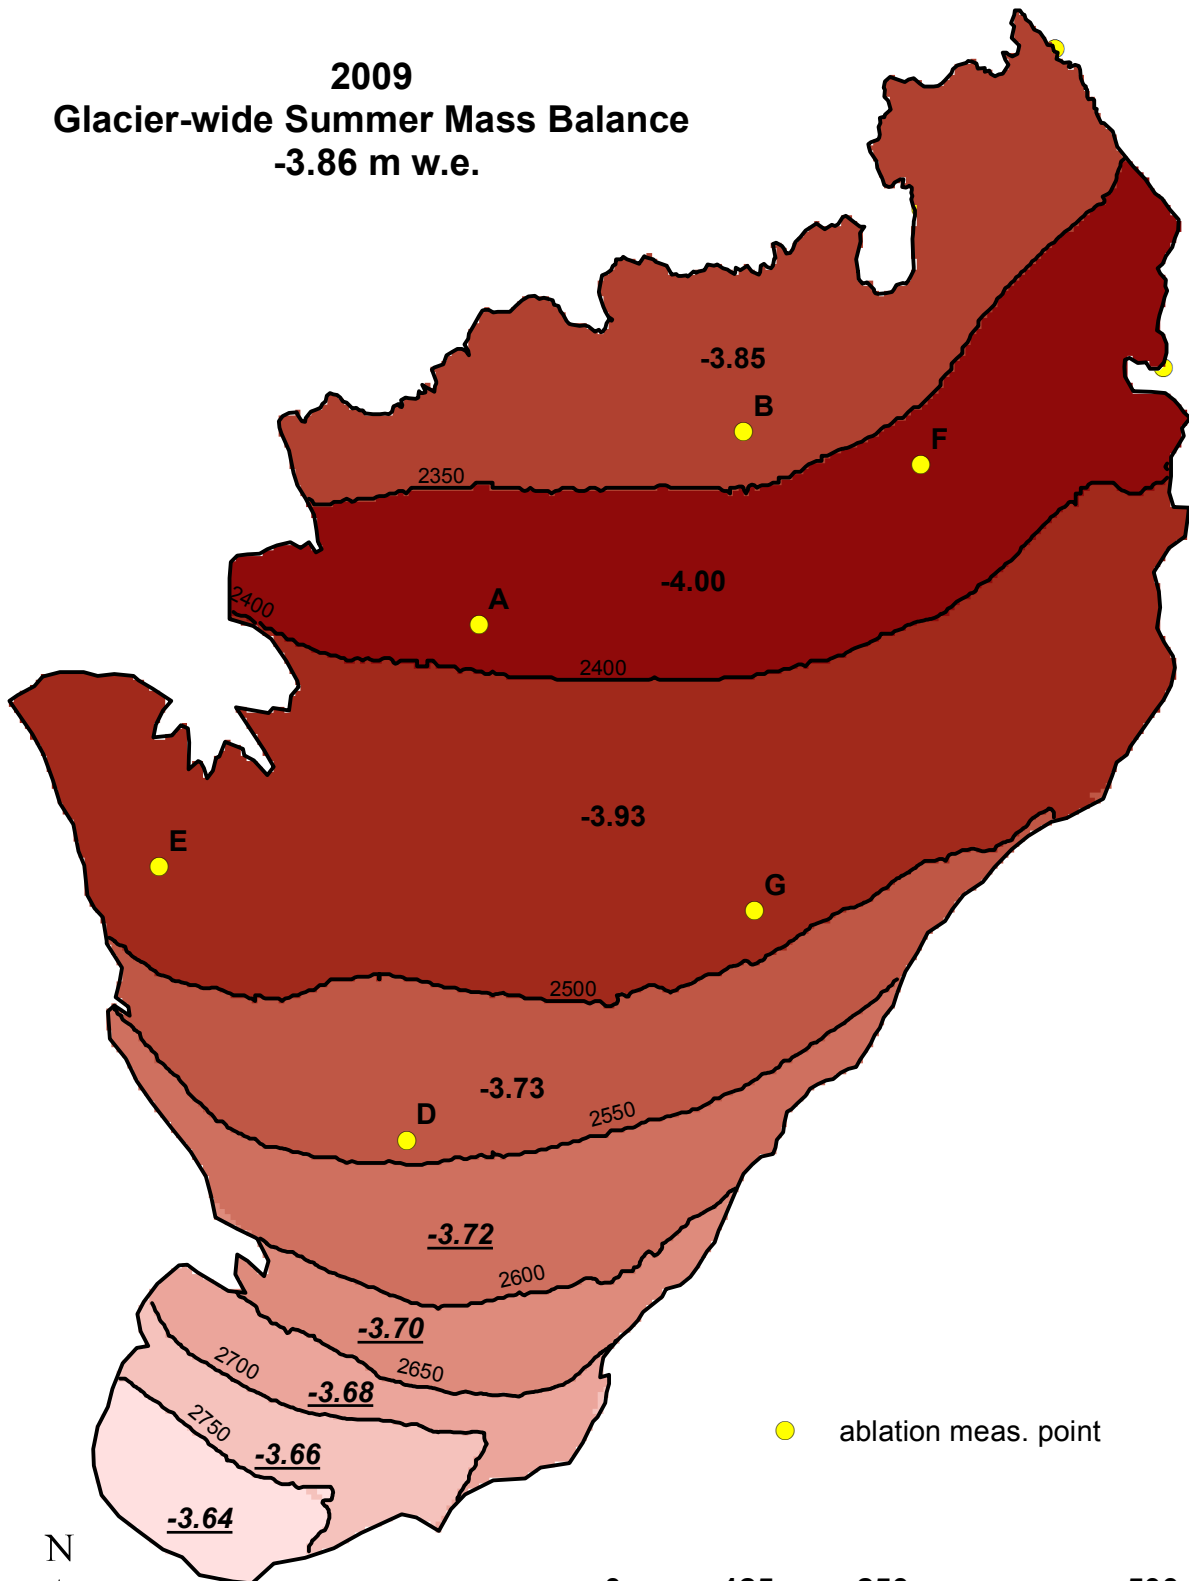

● ablation meas. point



0 125 250 500 m

NAD83 UTM 12N

297000.000000

297000 000000

5390000 000000

5390000 000000

# 2010 Glacier-wide Summer Mass Balance -2.80 m w.e.

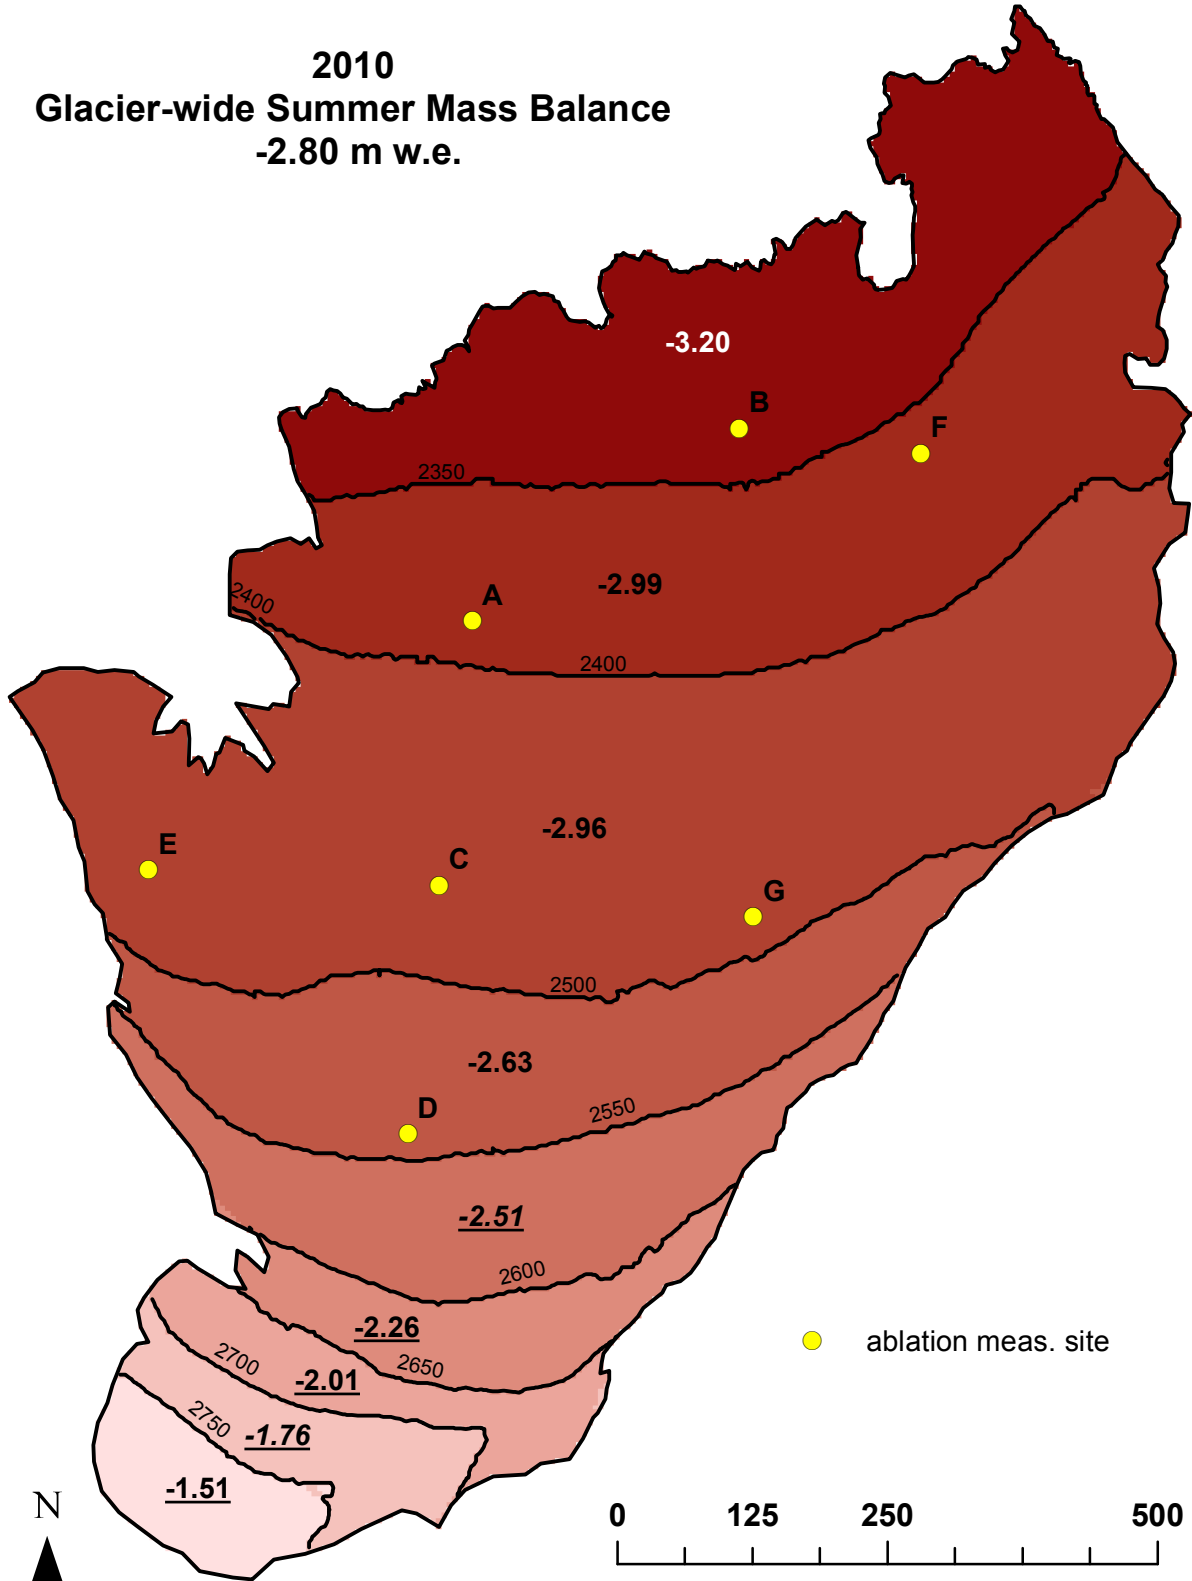

● ablation meas. site

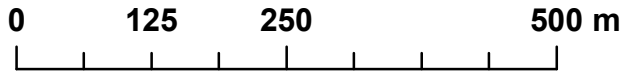

NAD83 UTM 12N

297000 000000

### 2011 Glacier-wide Summer Mass Balance -3.21 m w.e.

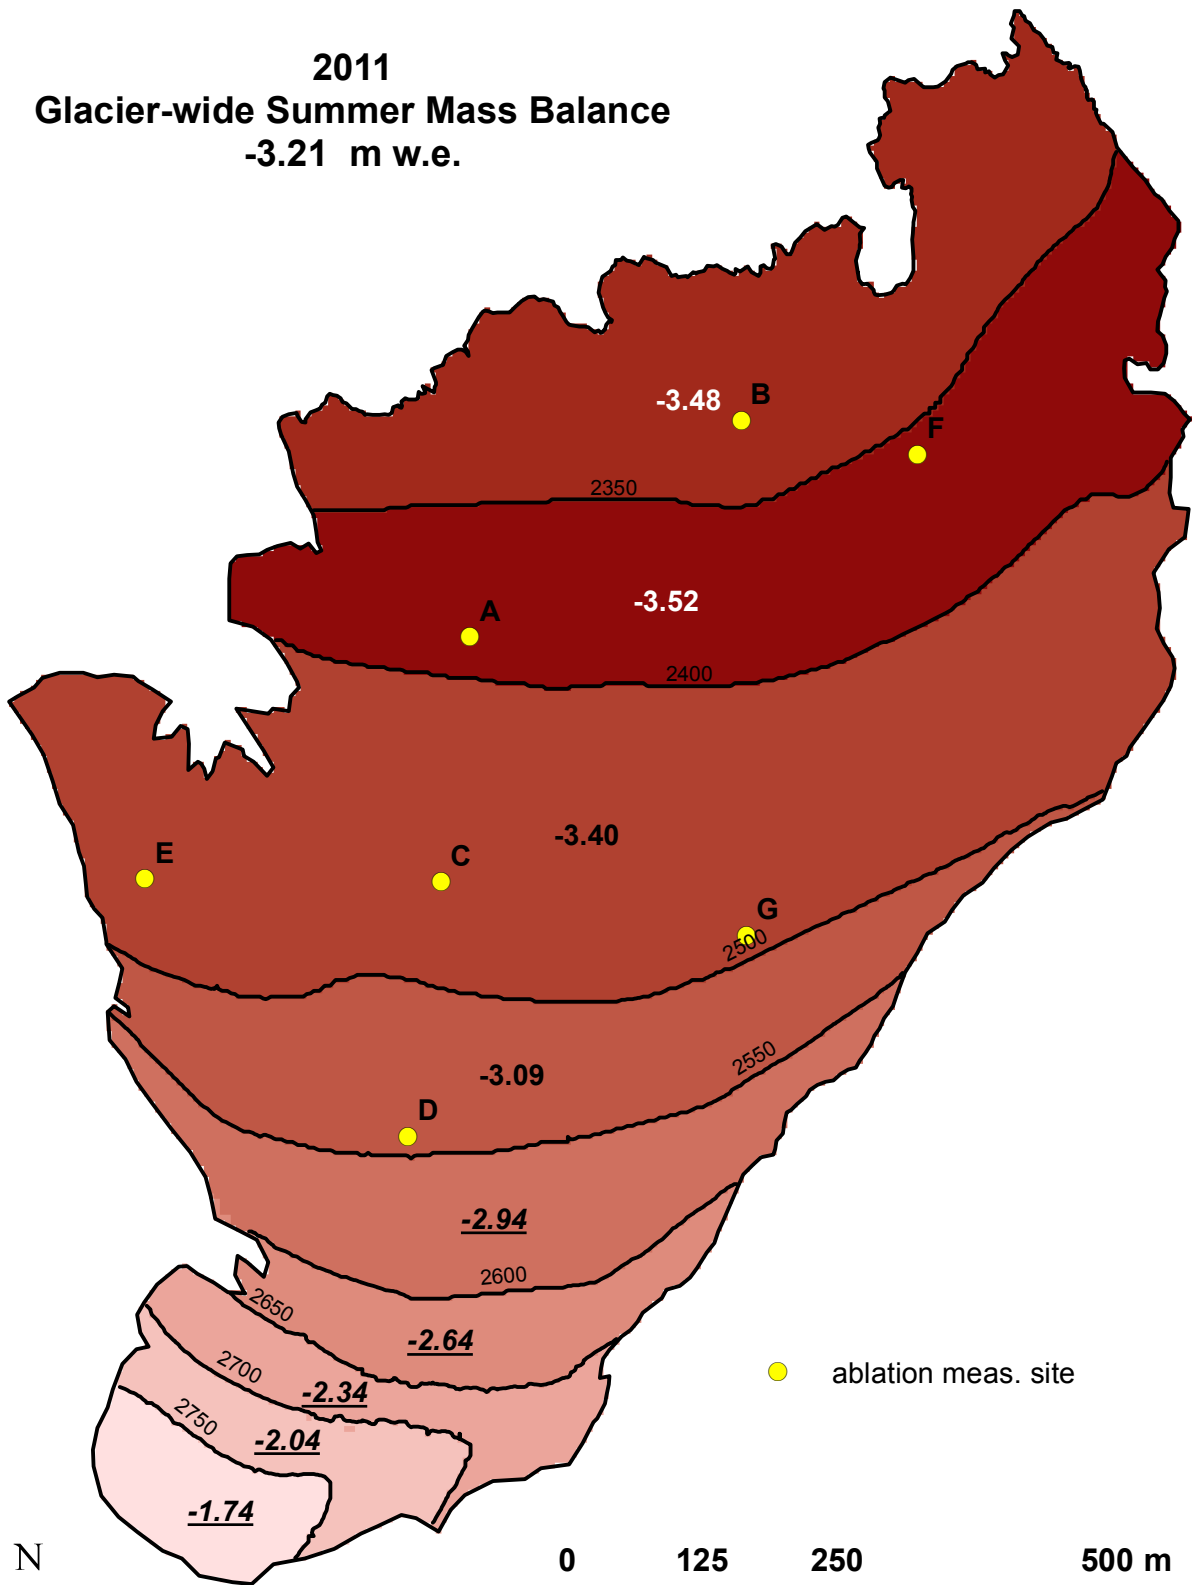

● ablation meas. site

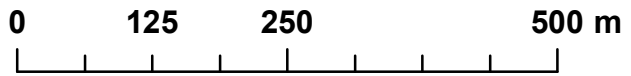

NAD83 UTM 12N

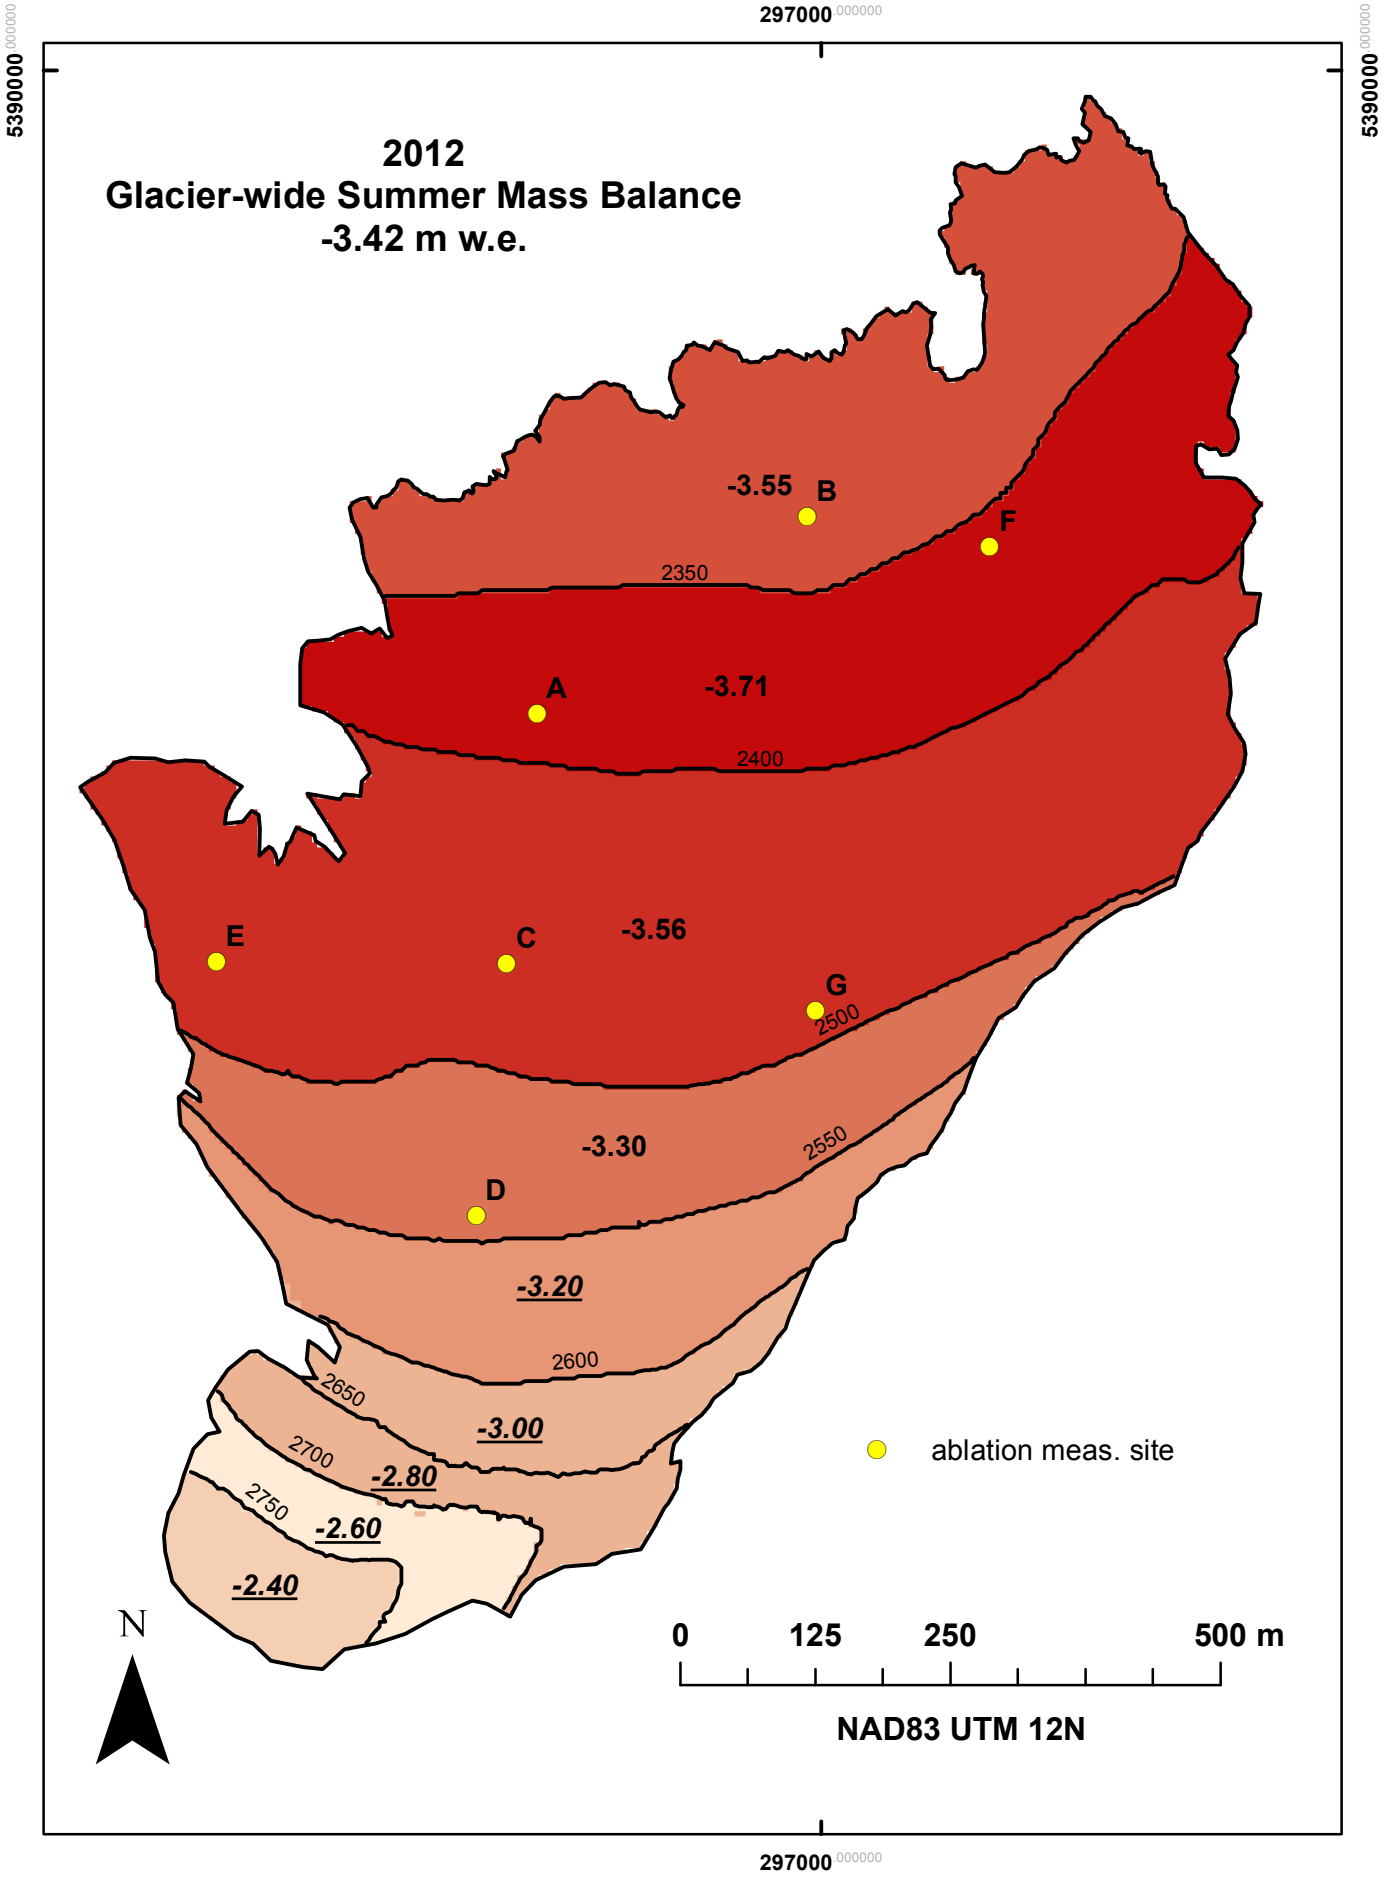

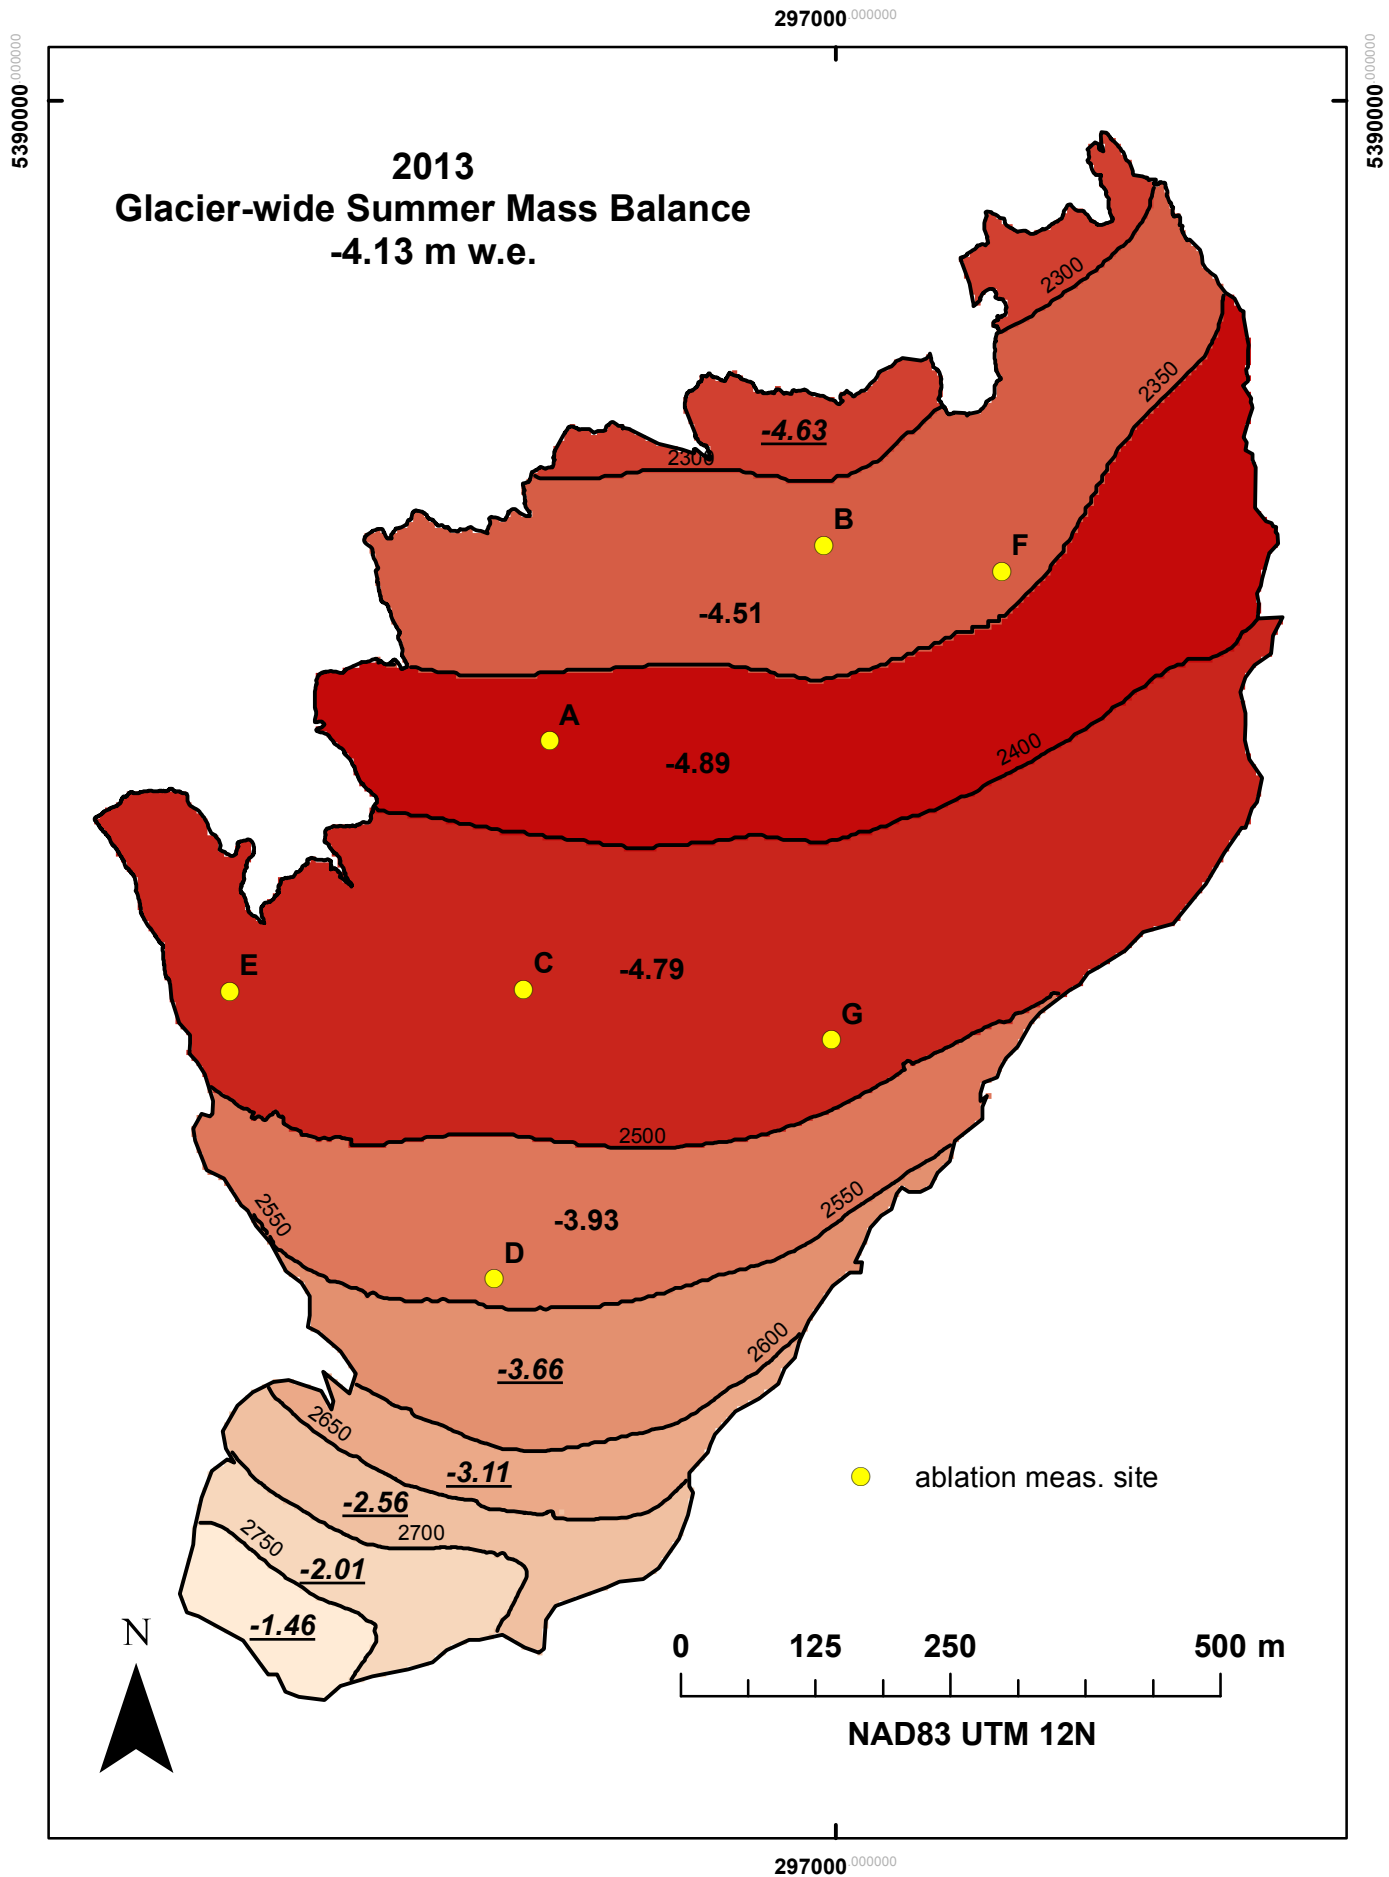

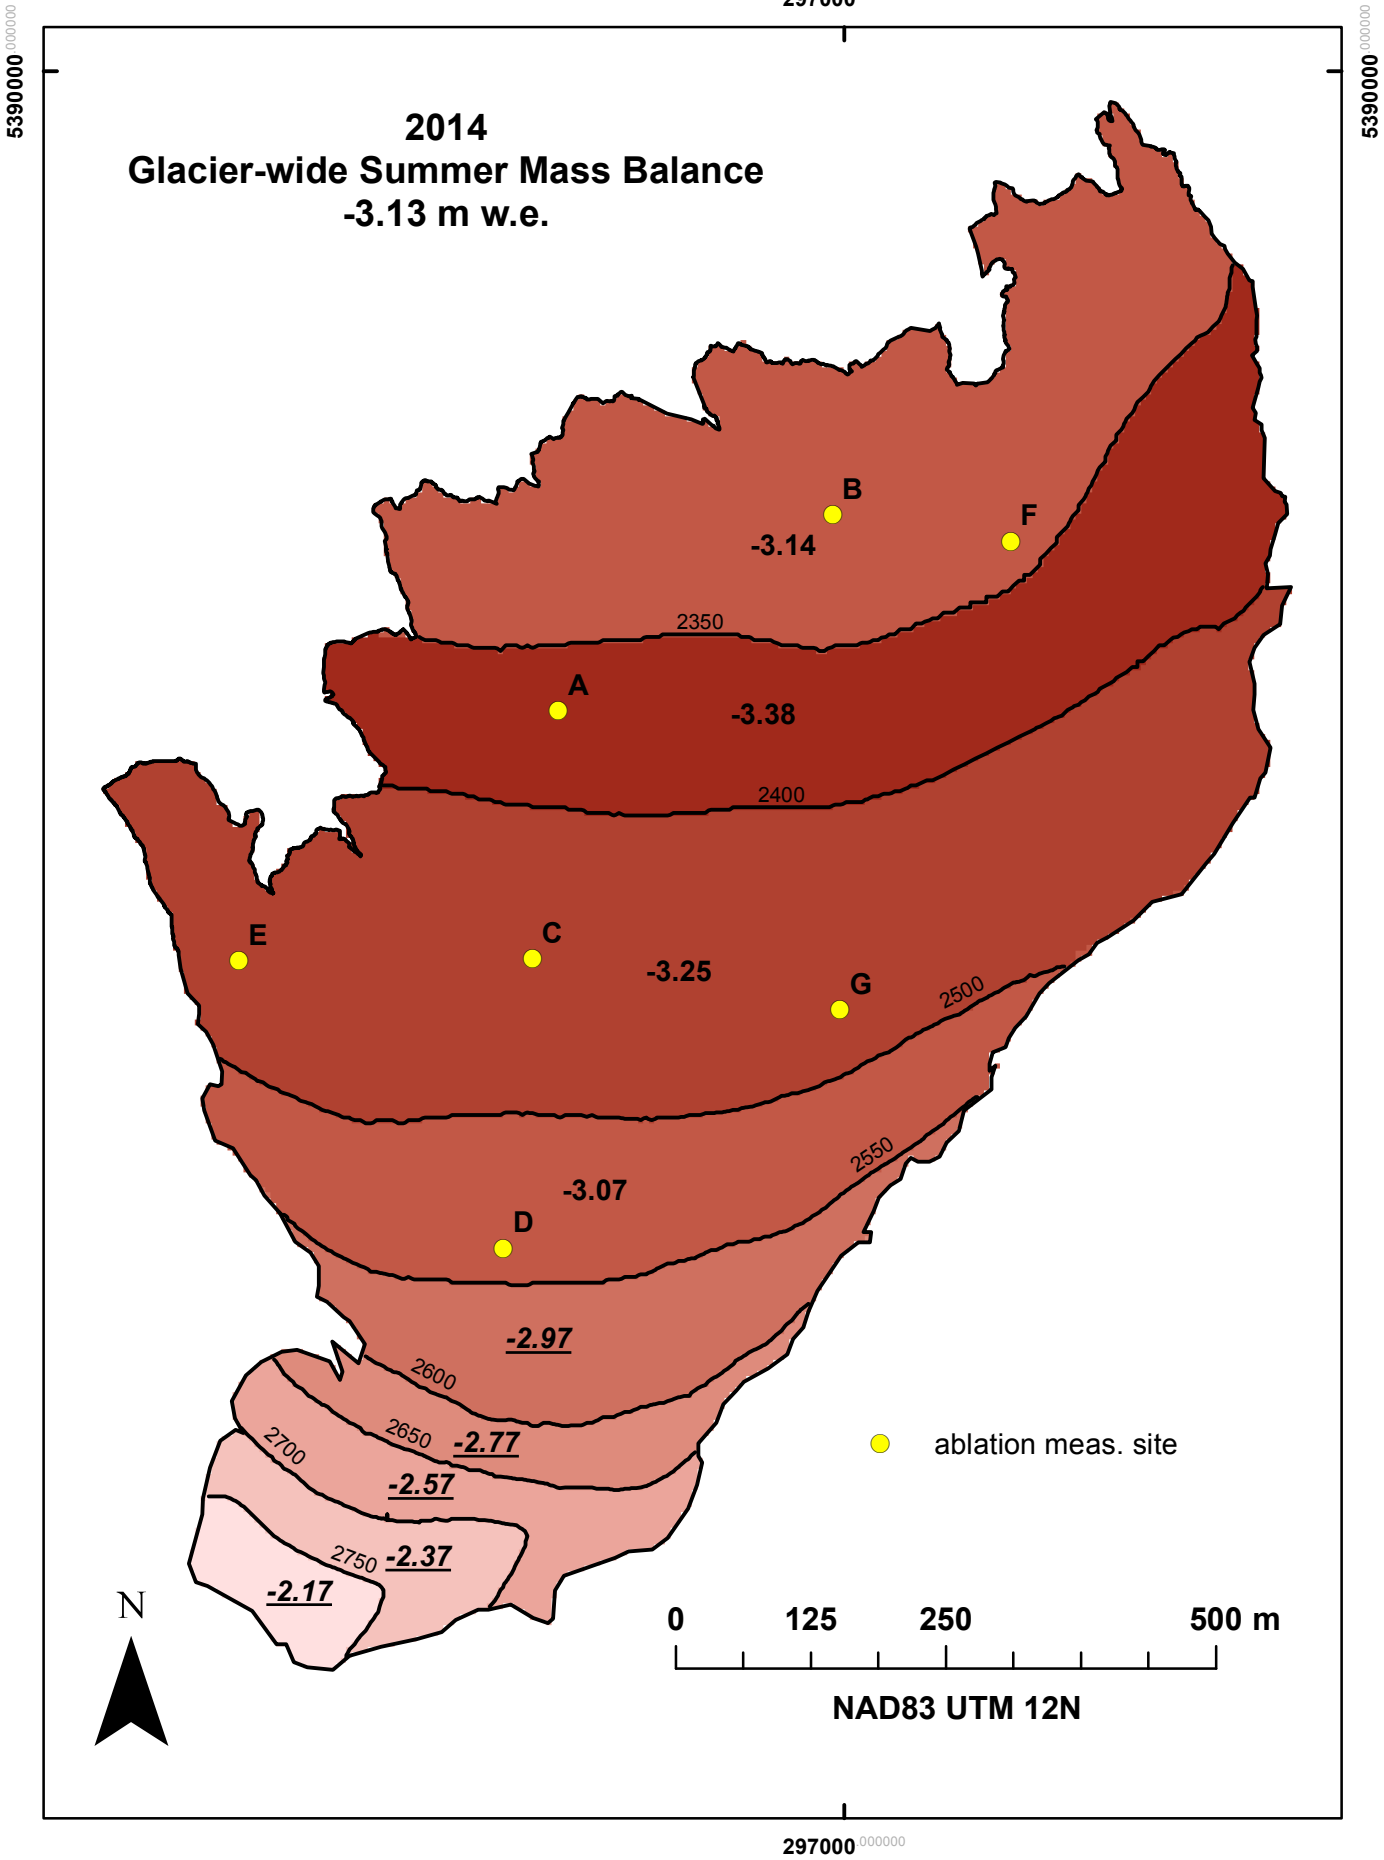

297000 000000

# 2015 Glacier-wide Summer Mass Balance -4.01

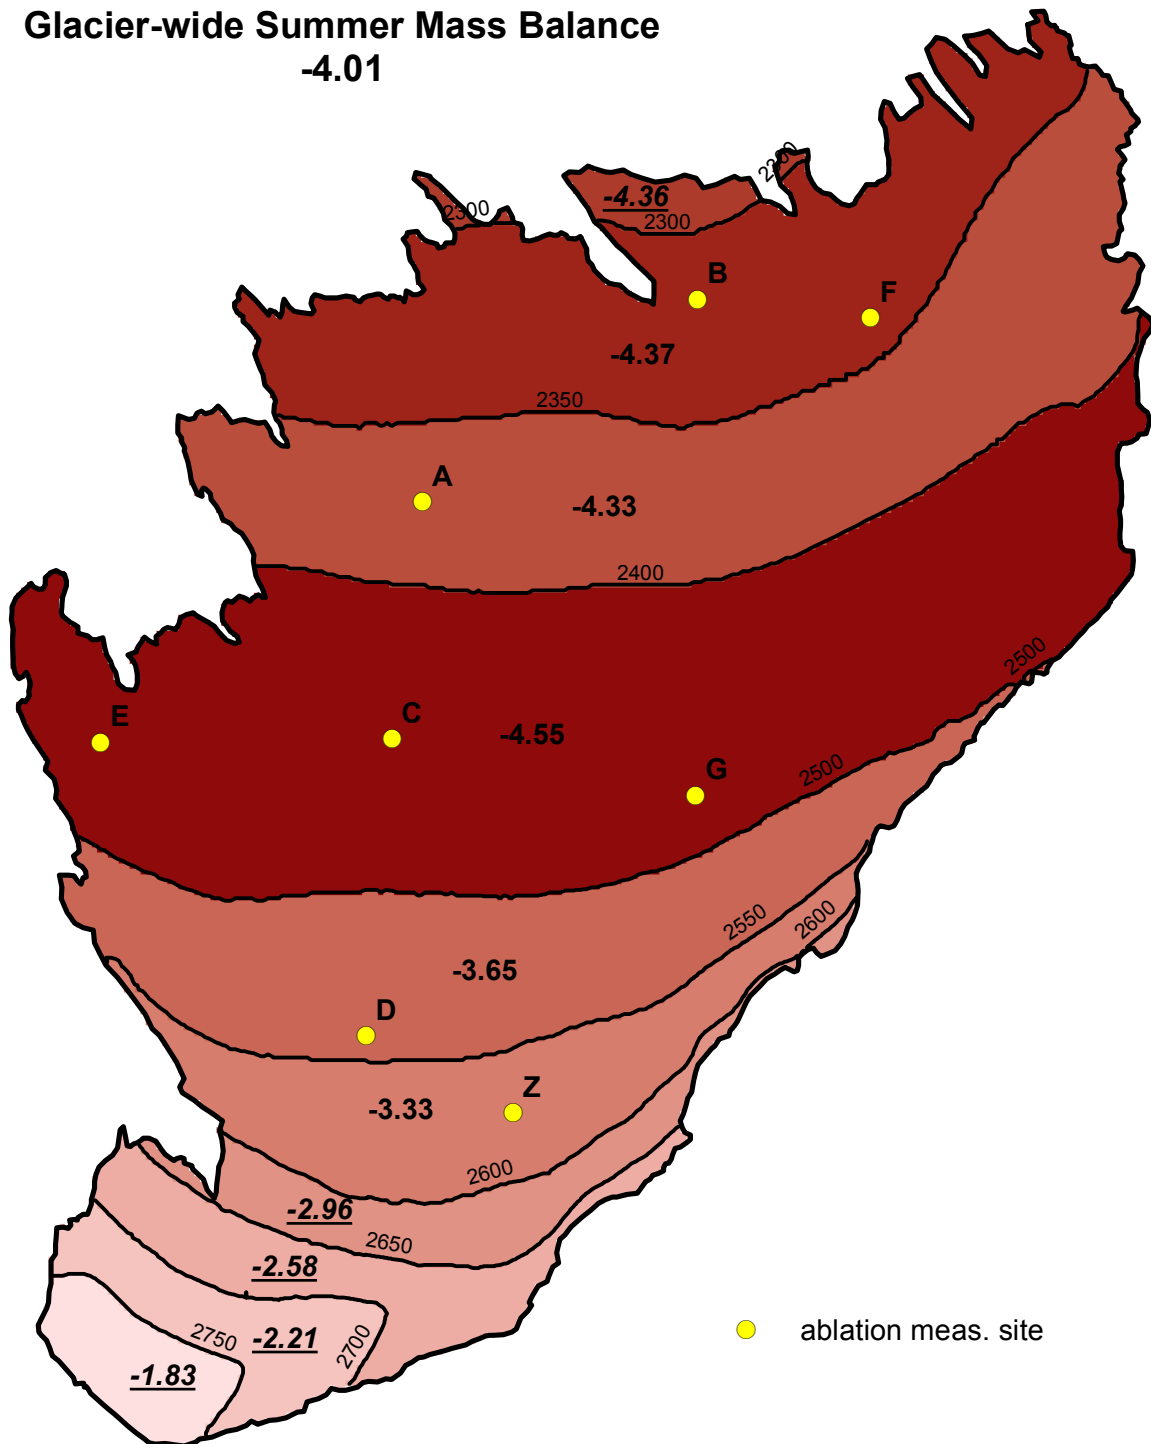

● ablation meas. site



NAD 83 UTM 12N

297000 000000



297000.000000

5390000.000000

5390000.000000

### 2005 Glacier-wide Annual Mass Balance -0.85 m w.e.

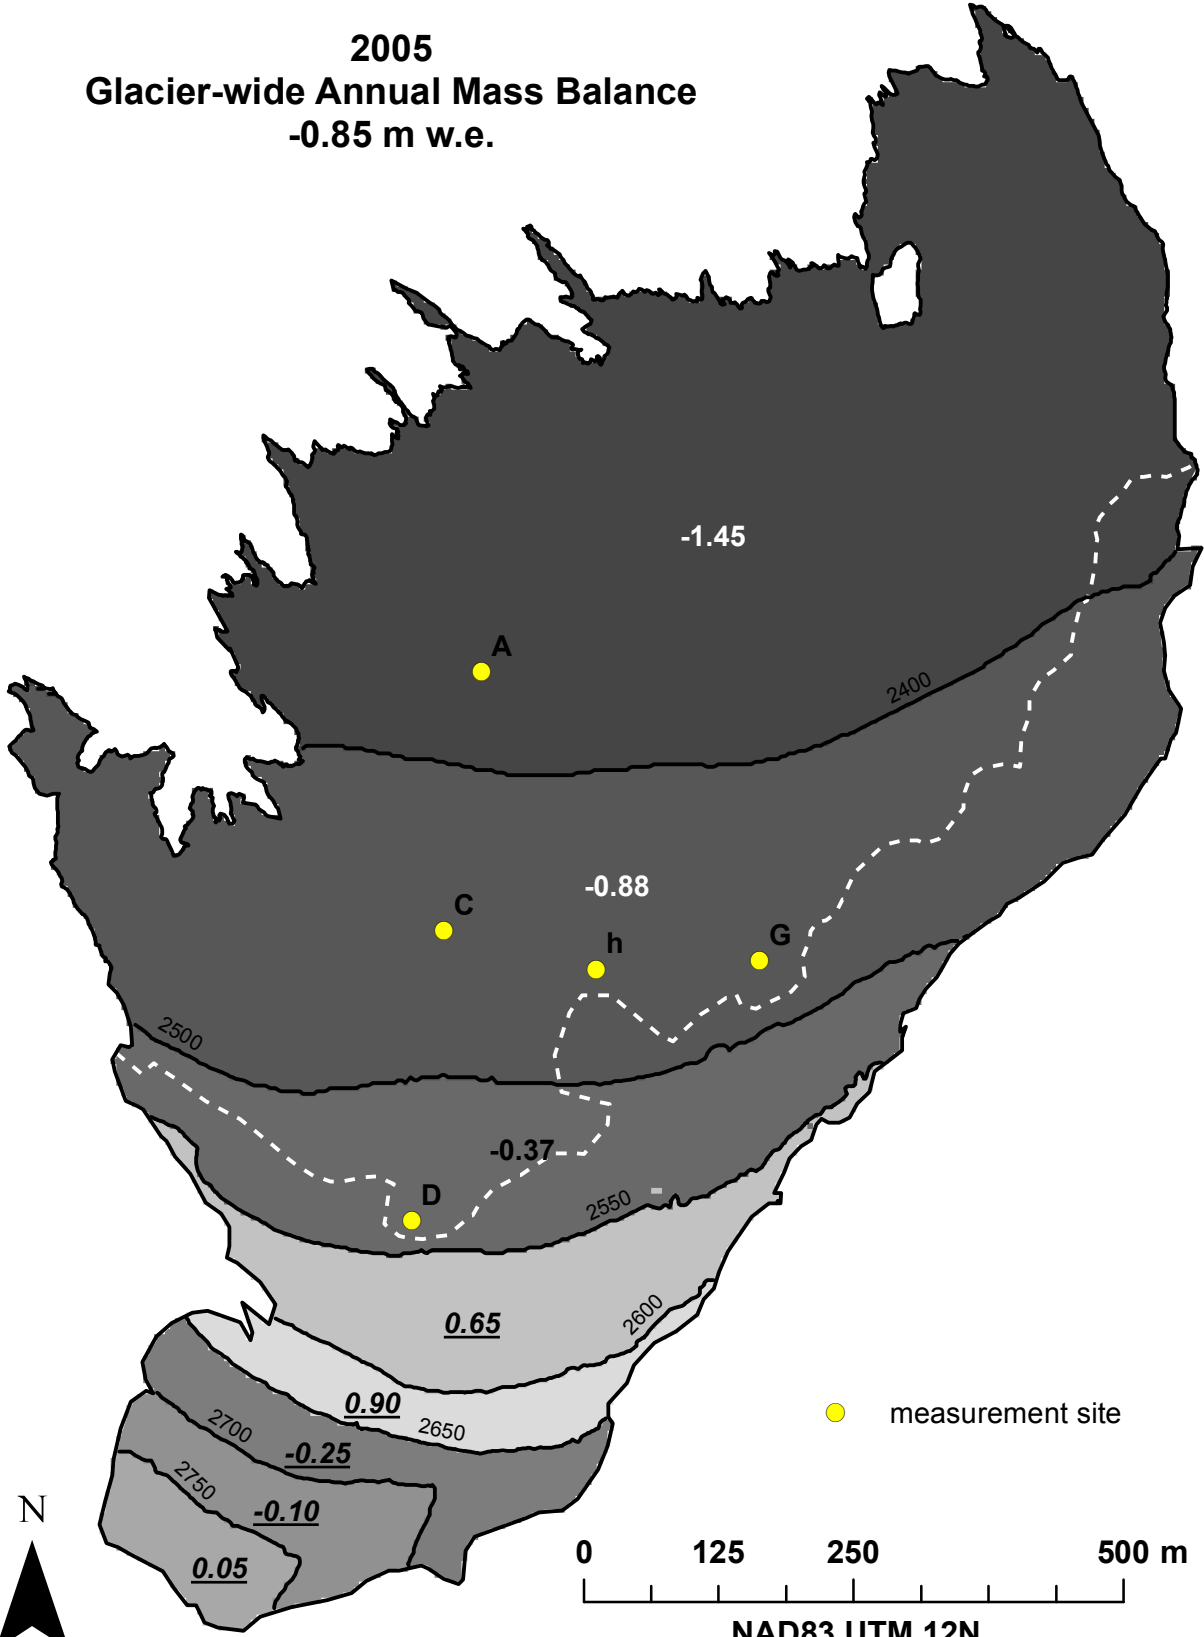

● measurement site

0 125 250 500 m

NAD83 UTM 12N

297000.000000

297000 000000

5390000 000000

5390000 000000

### 2006 Glacier-wide Annual Mass Balance -0.75 m w.e.

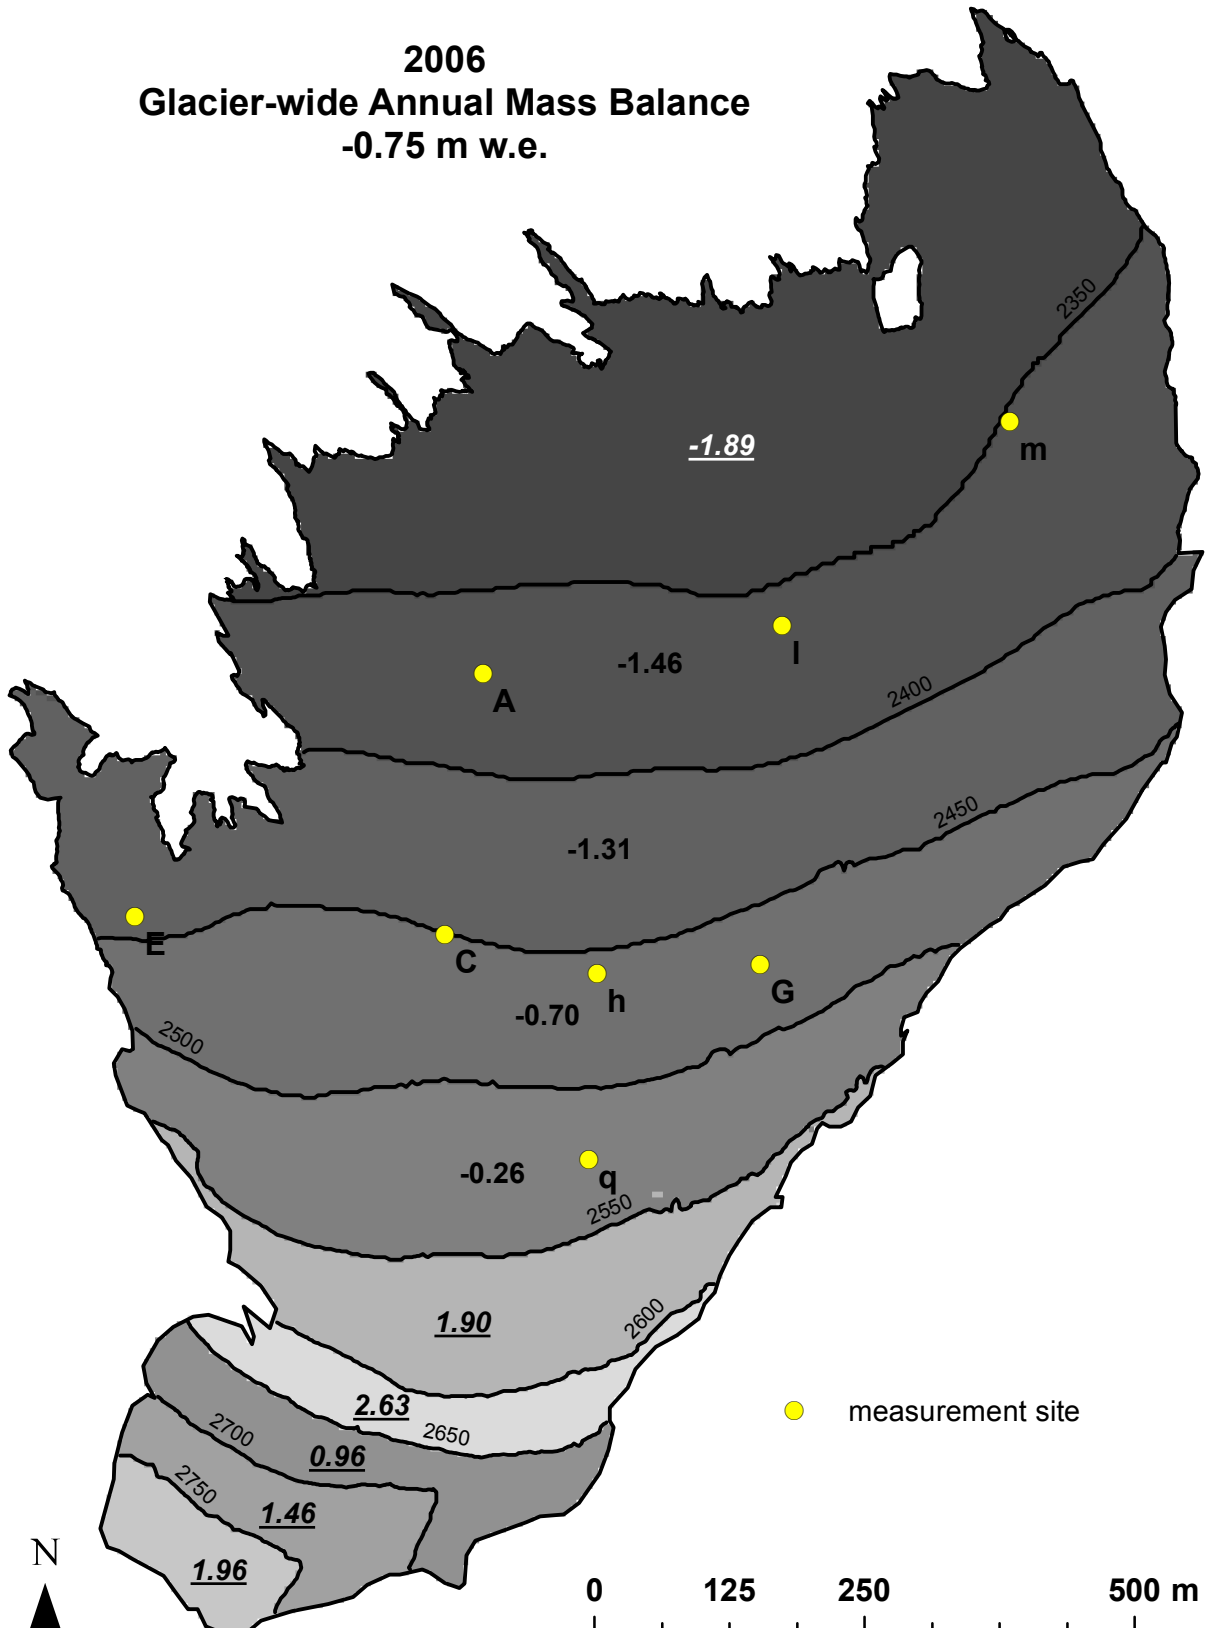

● measurement site

0 125 250 500 m

NAD83 UTM 12N

297000 000000

297000 000000

5390000 000000

5390000 000000

**2007  
Glacier-wide Annual Mass Balance  
-1.52 m w.e.**

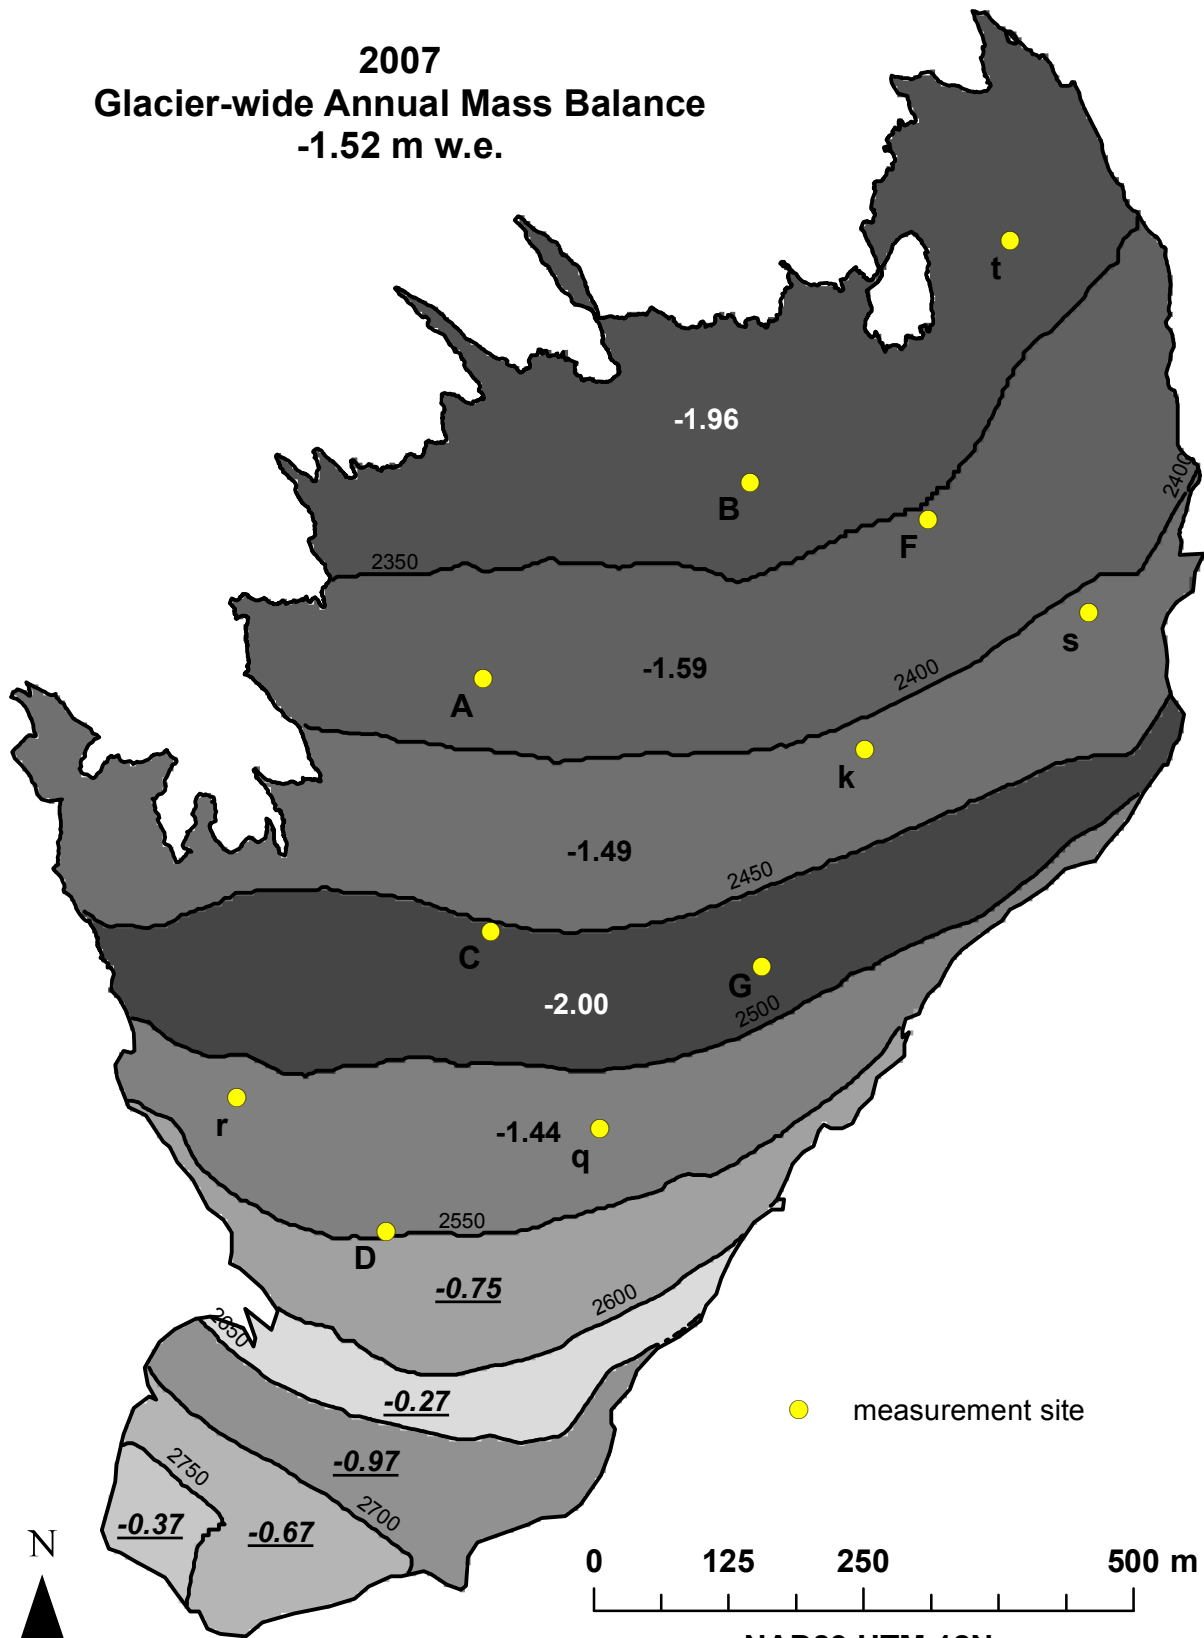

● measurement site

0 125 250 500 m

NAD83 UTM 12N

297000 000000

297000 000000

5390000 0000000

5390000 0000000

# 2008 Glacier-wide Annual Mass Balance 0.97 m w.e.

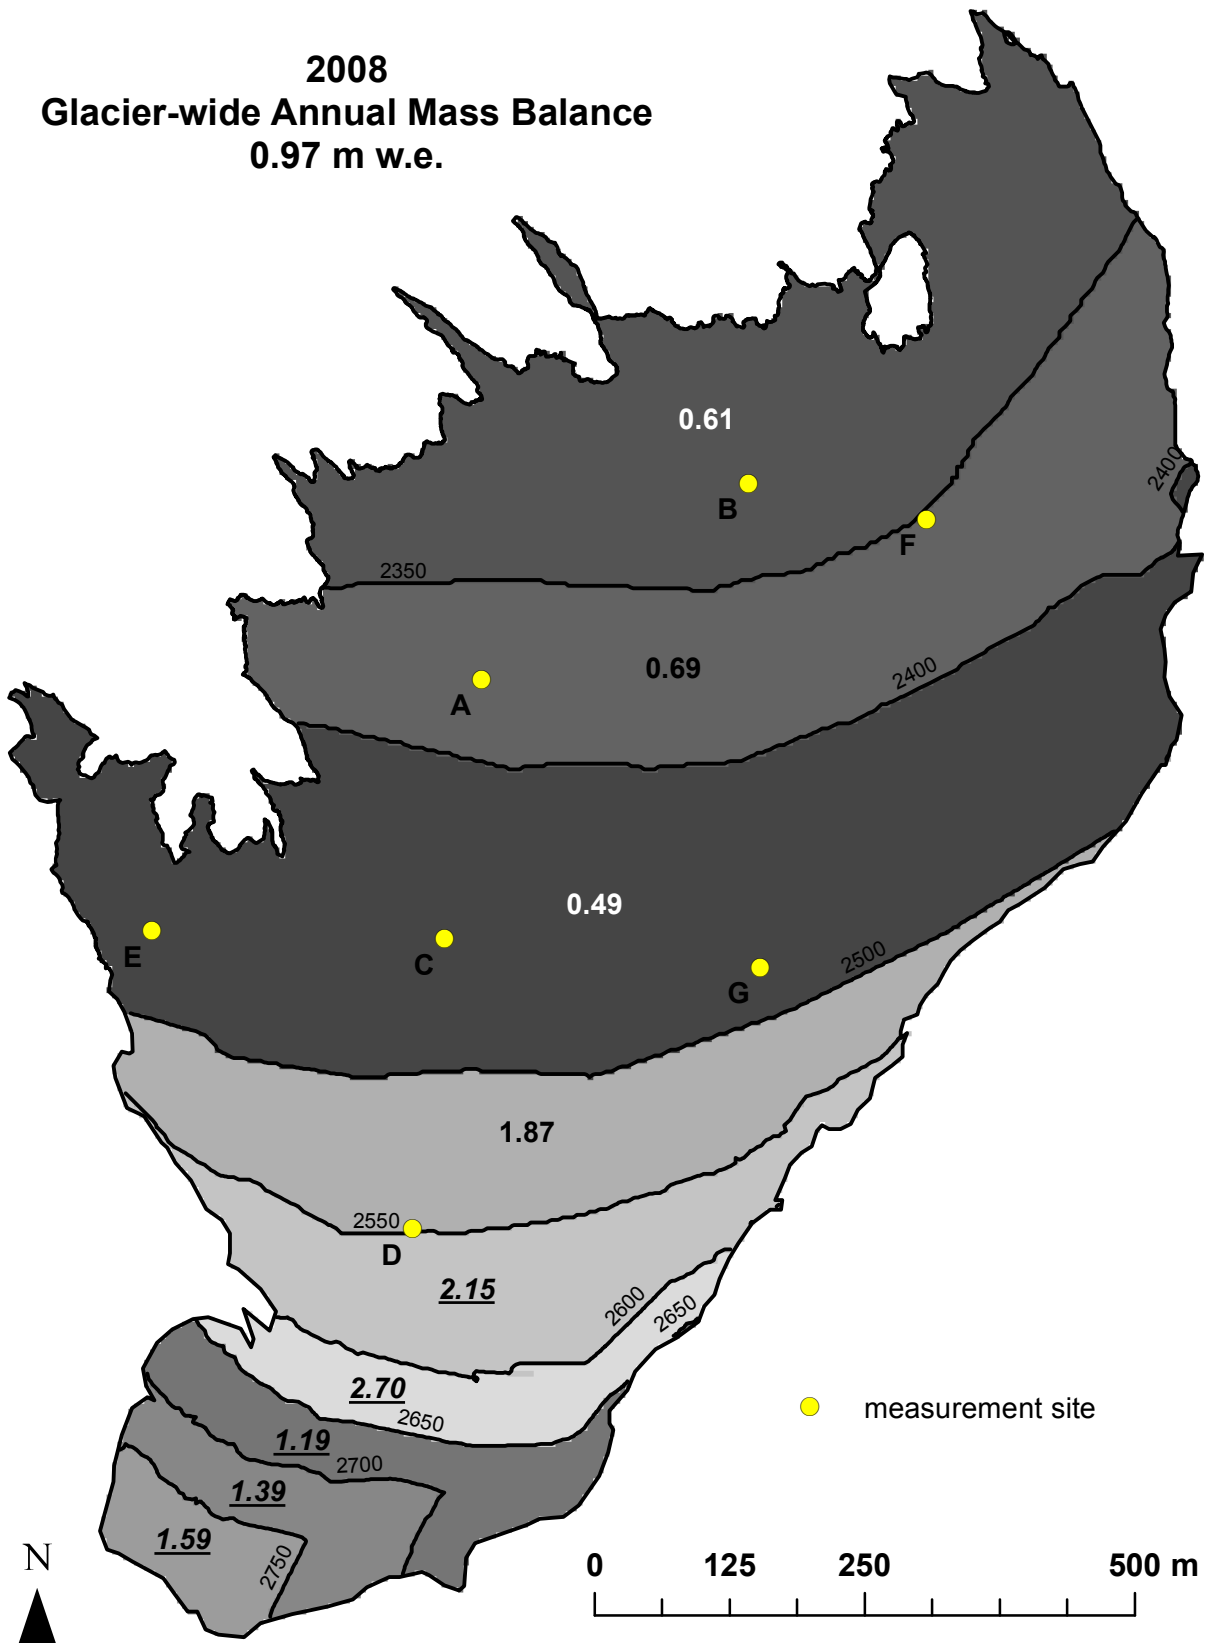

● measurement site

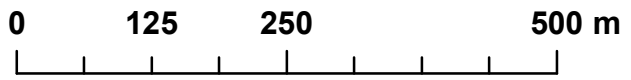

NAD83 UTM 12N

297000 000000

5390000.000000

297000.000000

5390000.000000

# 2009 Glacier-wide Annual Mass Balance -1.39 m w.e.

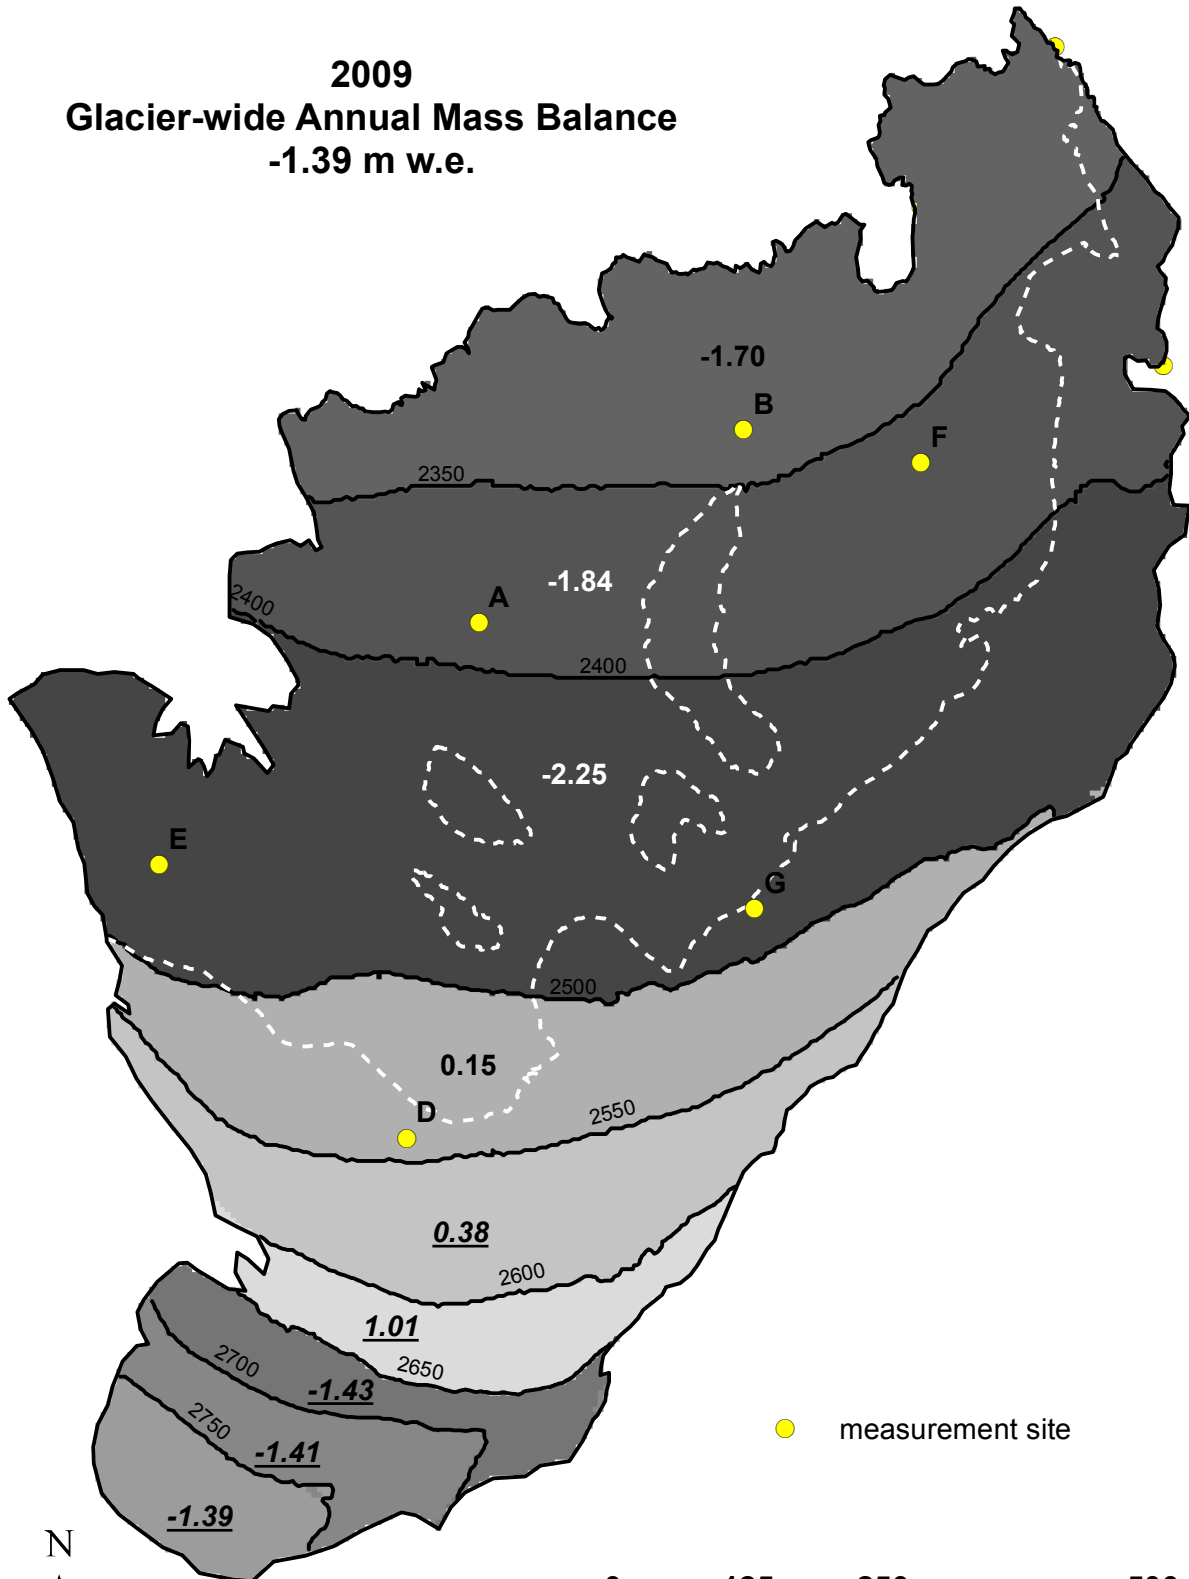

● measurement site



297000.000000

297000 000000

5390000 000000

5390000 000000

### 2010 Glacier-wide Annual Mass Balance 0.15 m w.e.

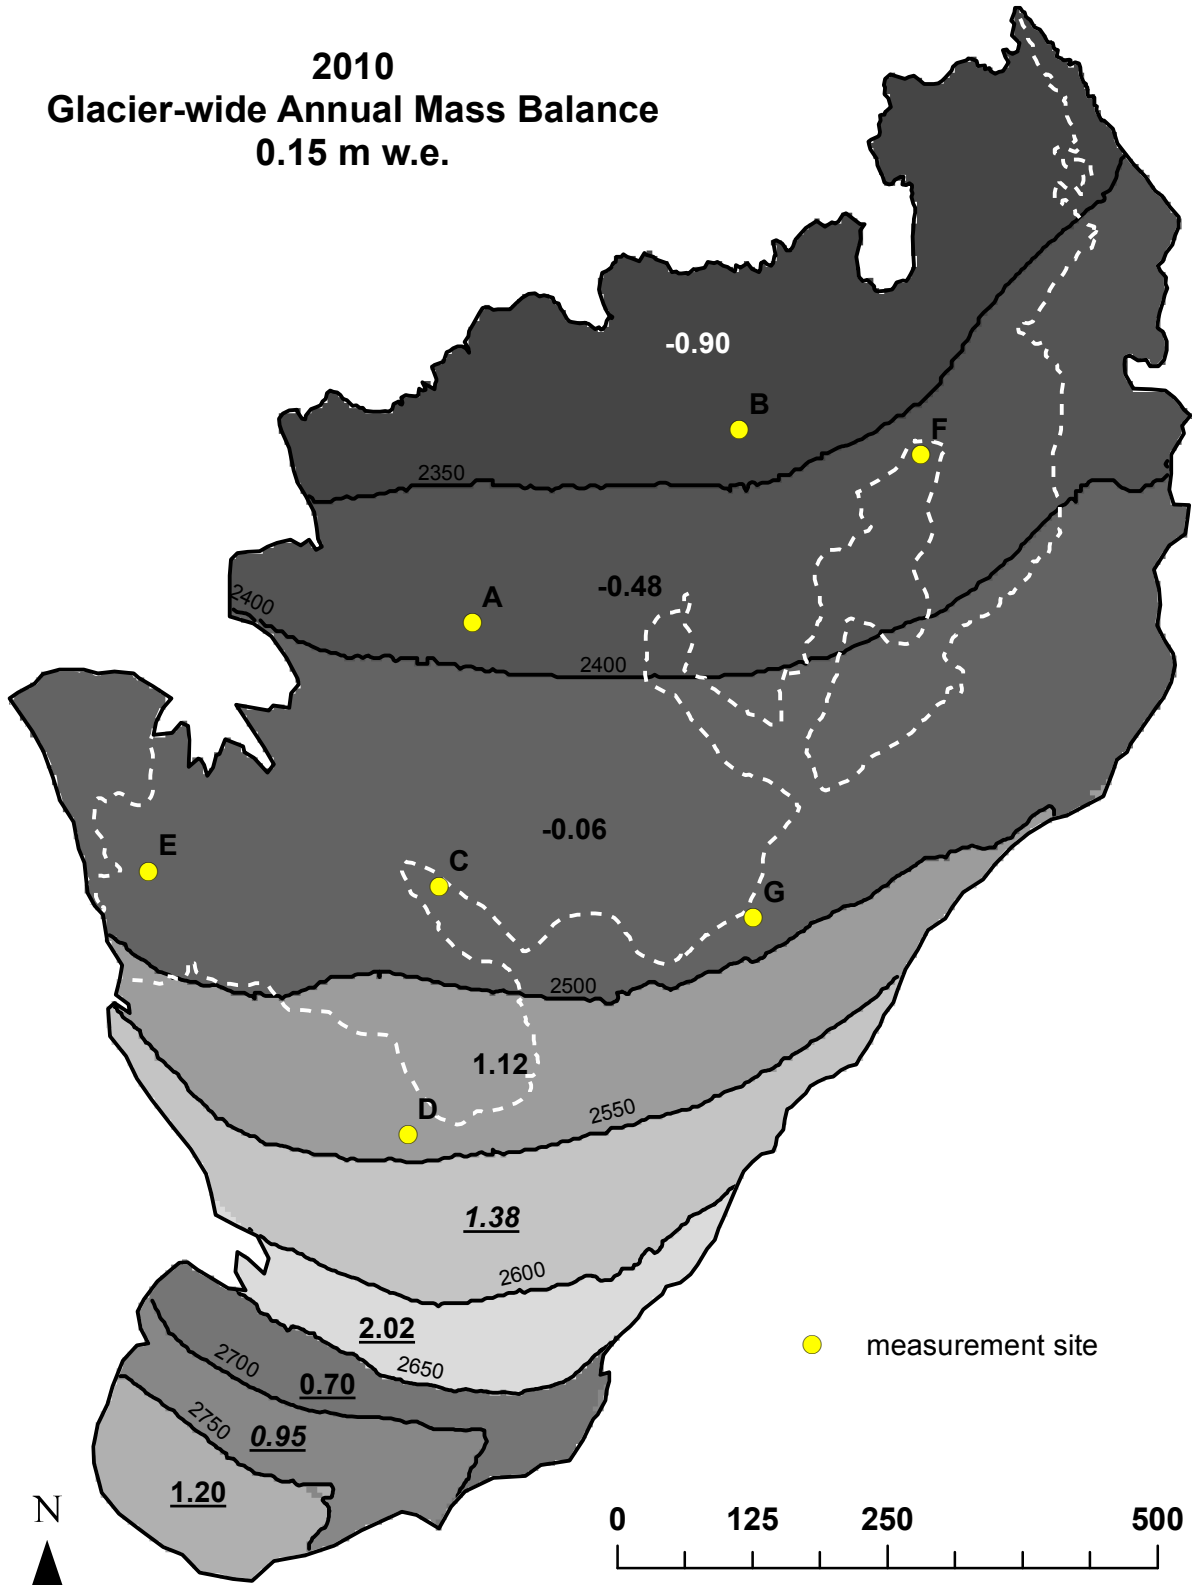

297000 000000

5390000.000000

297000.000000

5390000.000000

**2011  
Glacier-wide Annual Mass Balance  
0.83 m w.e.**

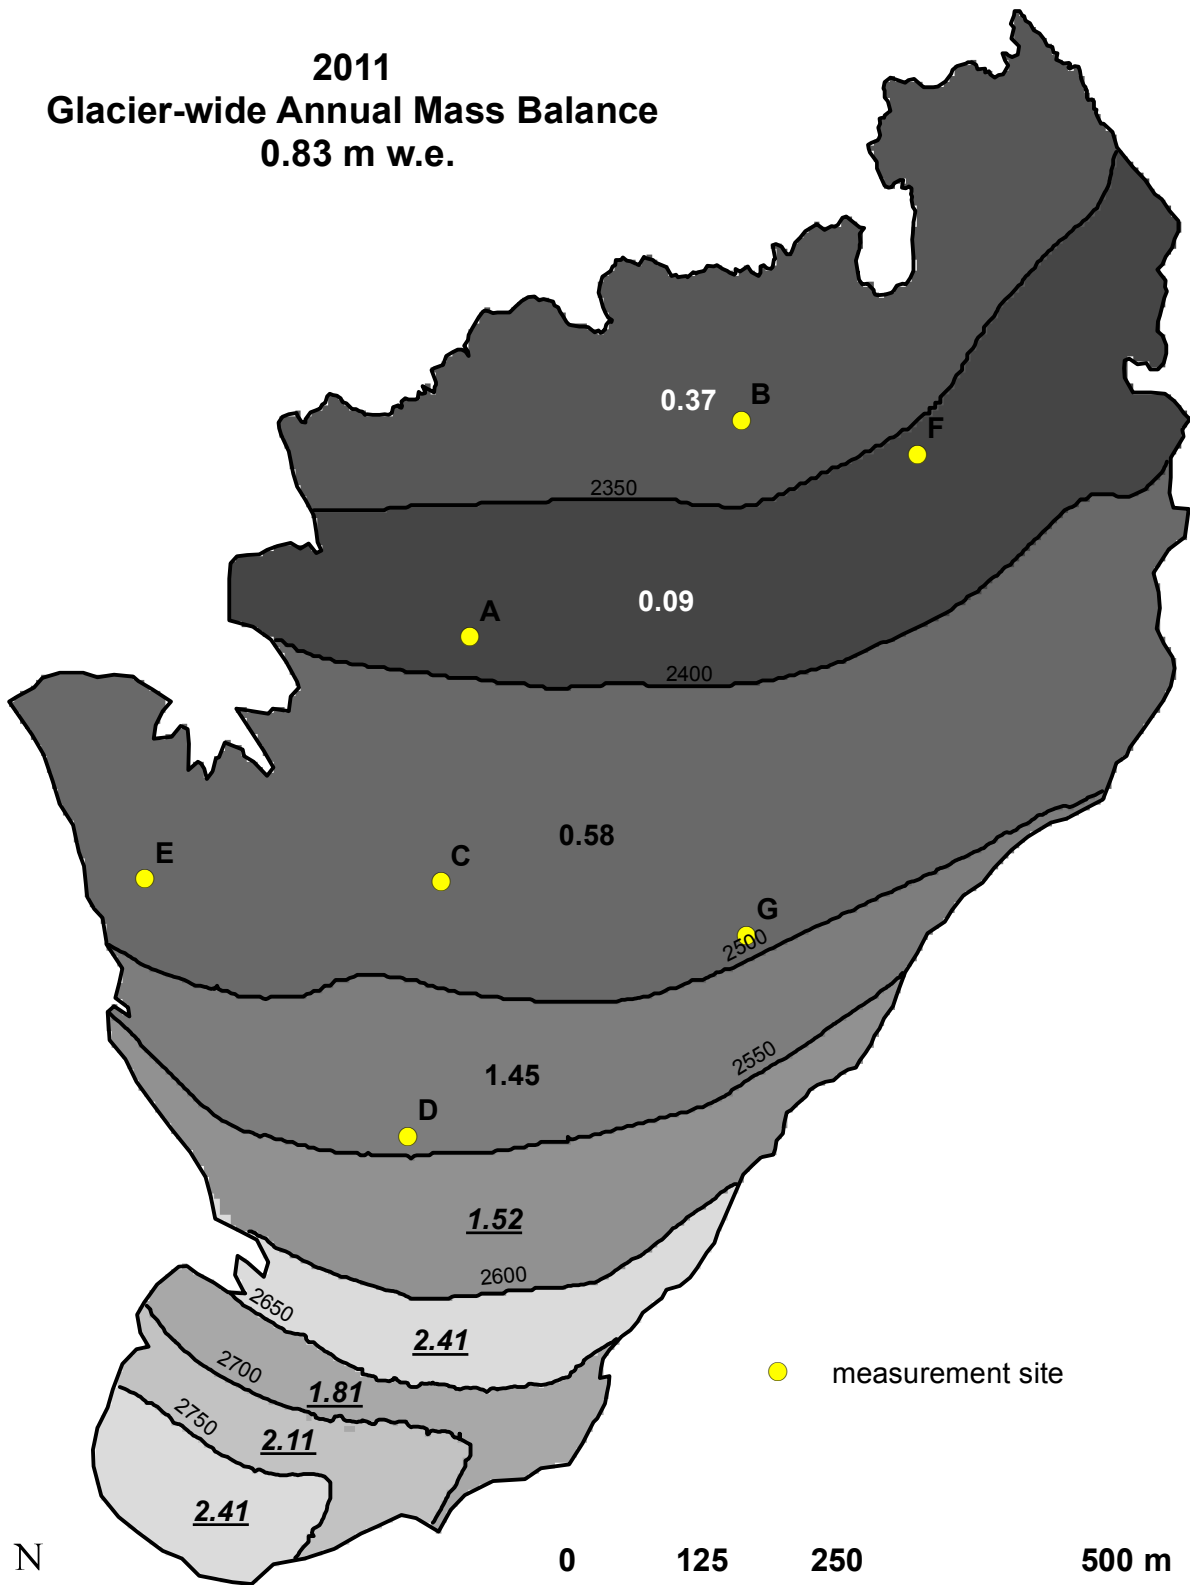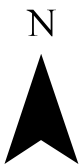

**NAD83 UTM 12N**

297000.000000

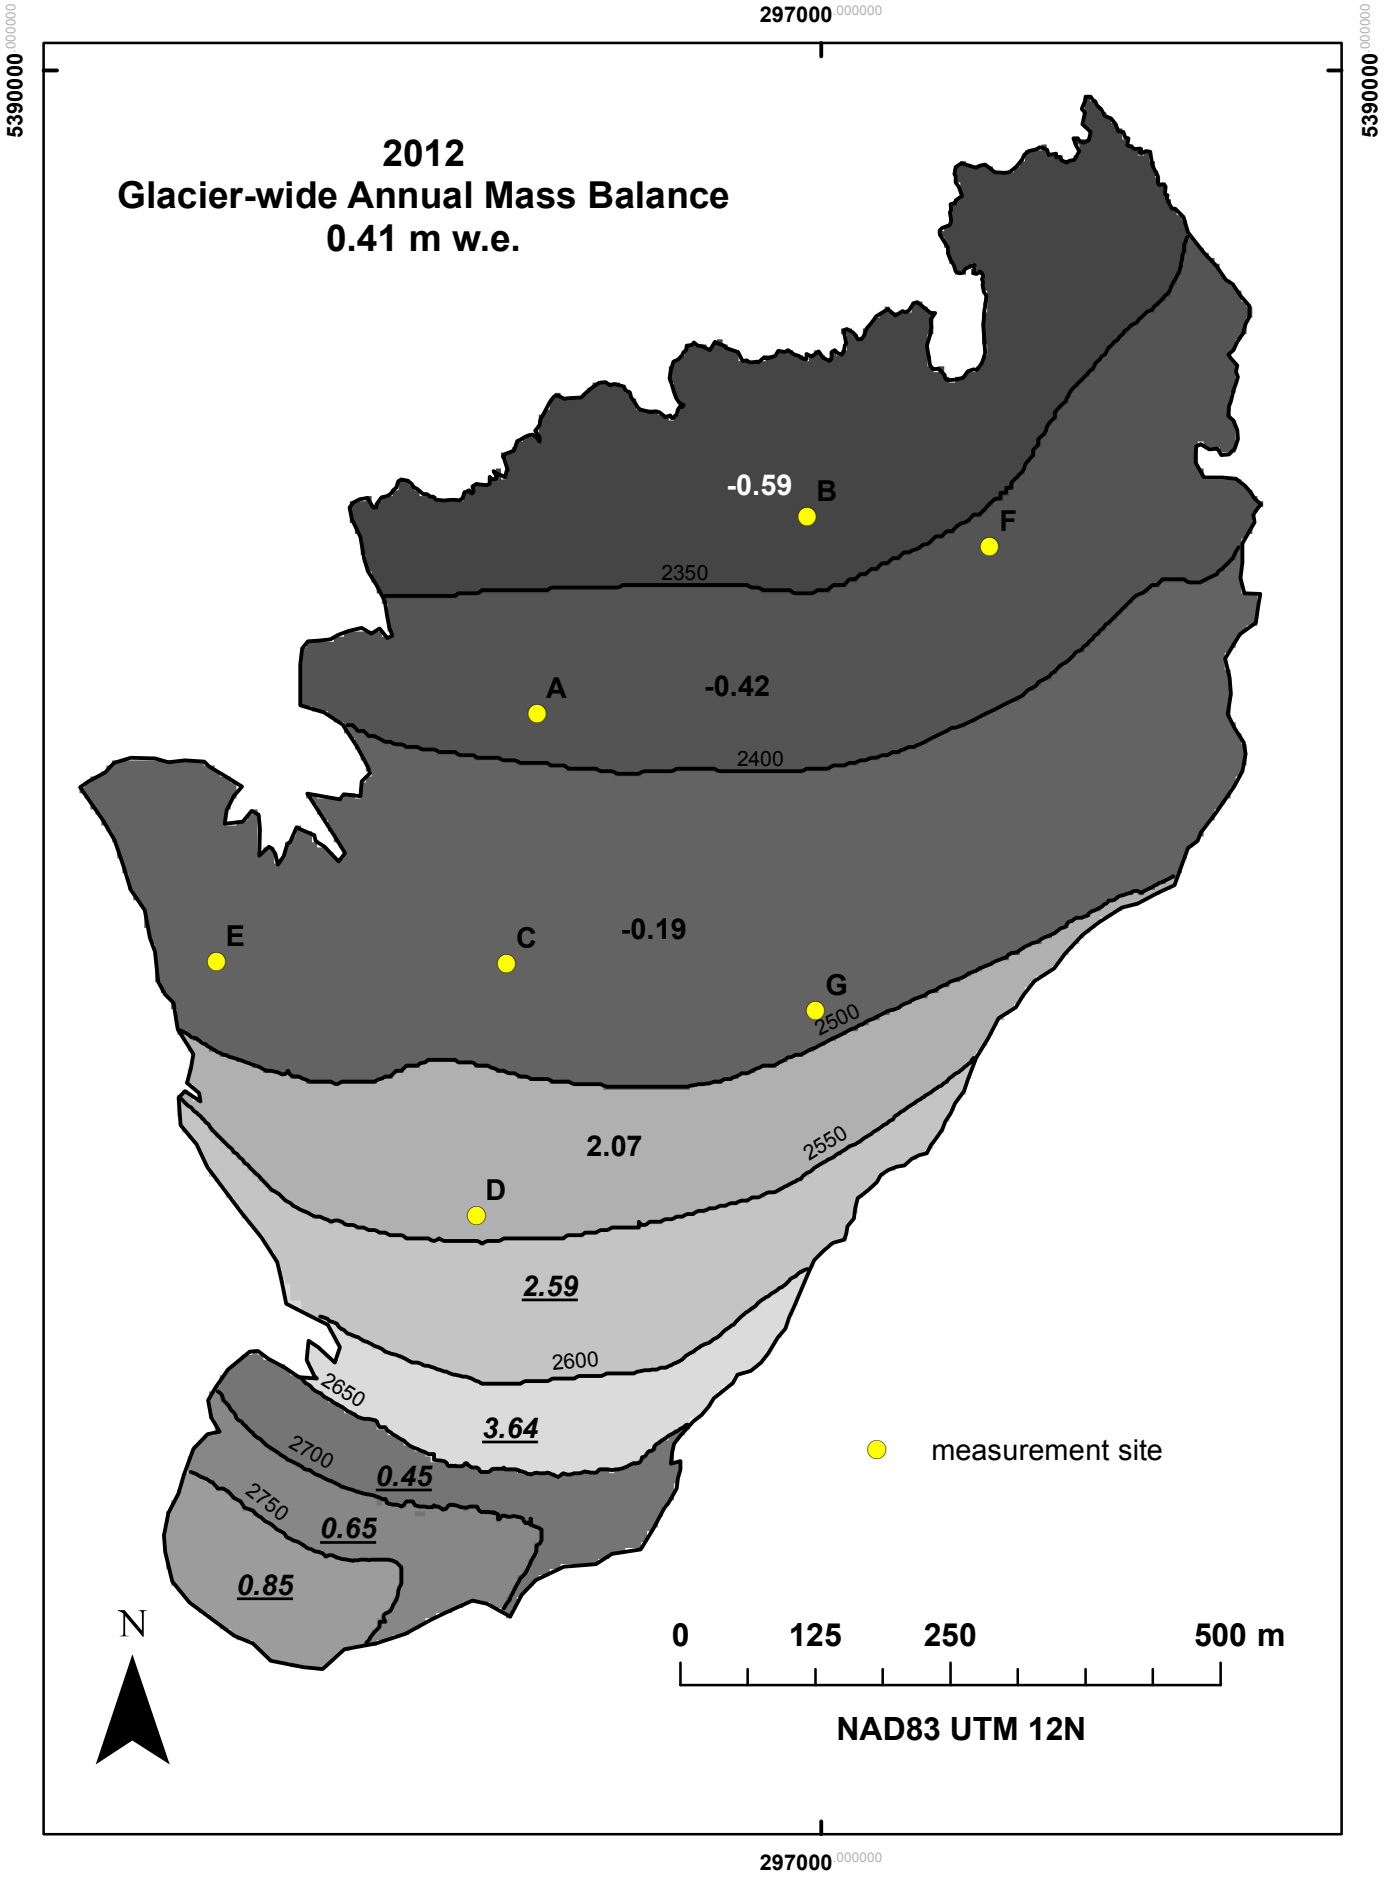



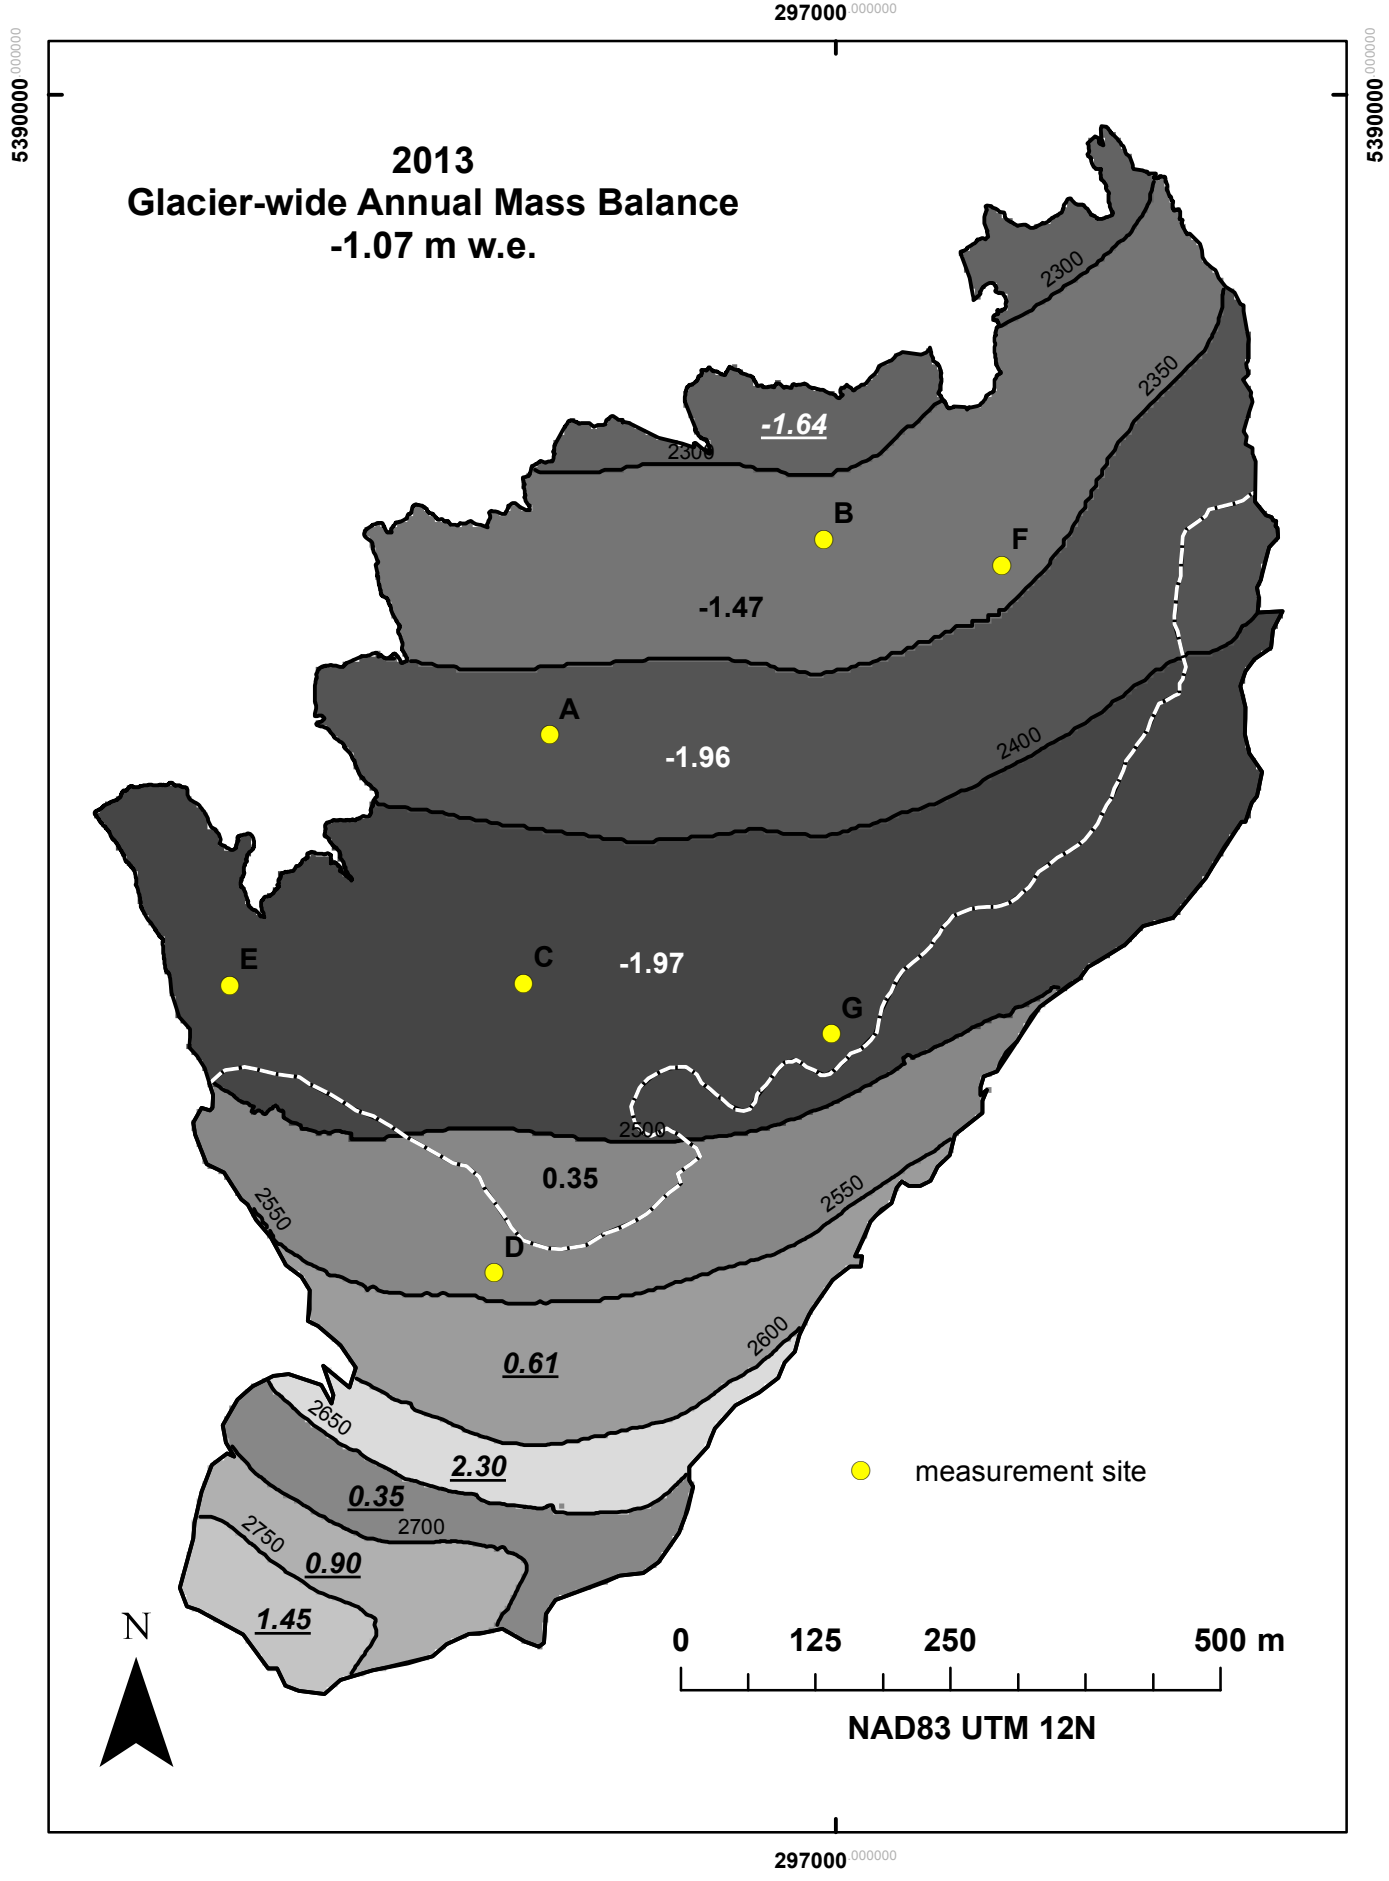

297000 000000

5390000 0000000

5390000 0000000

# 2014 Glacier-wide Annual Mass Balance 0.07 m w.e.

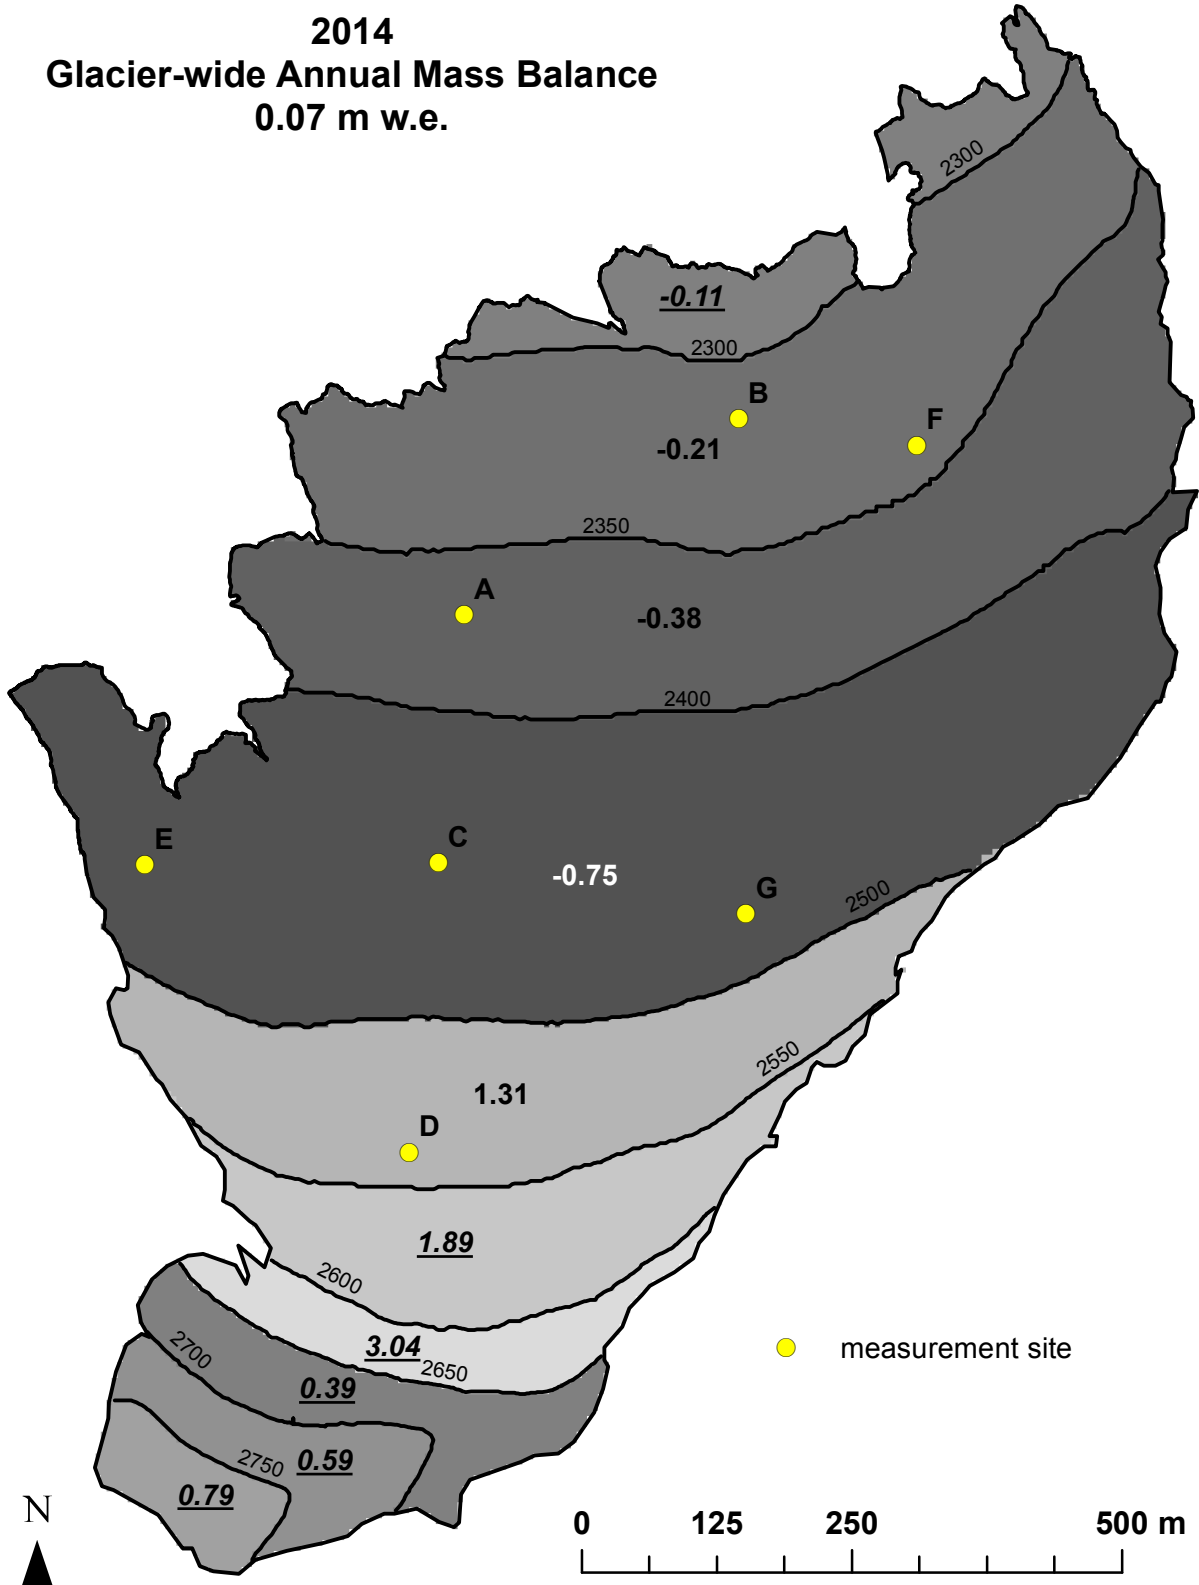

● measurement site

0 125 250 500 m

NAD83 UTM 12N

297000 000000

297000 000000

### 2015 Glacier-wide Annual Mass Balance -1.22 m w.e.

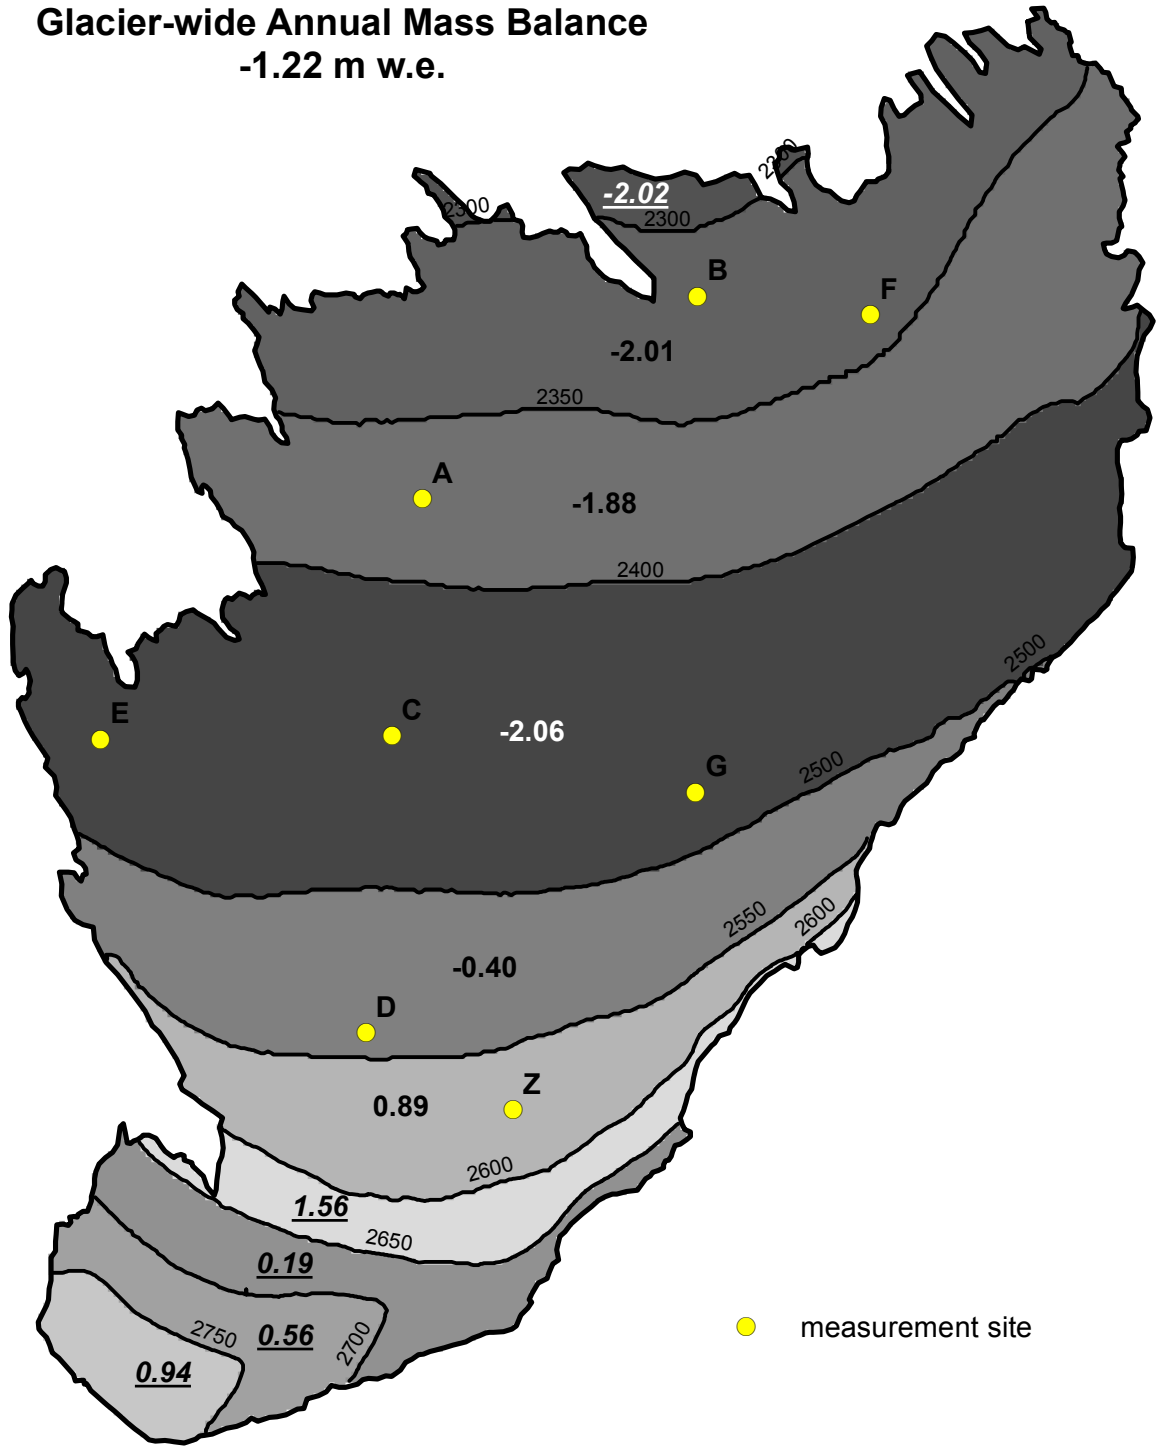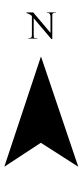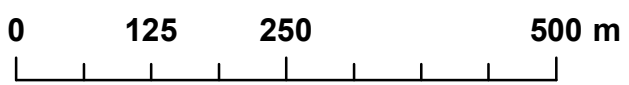

NAD 83 UTM 12N

297000 000000

## Supplement – Tables of Point Balance Data

Table S1: 2005 snow depths

Coordinates: NAD83 UTM Zone 12N

| 2005     |                   |               |             |         |           |          |                    |                               |                |
|----------|-------------------|---------------|-------------|---------|-----------|----------|--------------------|-------------------------------|----------------|
| Point ID | Measurement Group | Date Measured | GPS         | Easting | Northing  | Elev (m) | Measured Depth (m) | Density (kg m <sup>-3</sup> ) | b <sub>w</sub> |
| A        | stake site        | 24-Jun        | uncorrected | 296,747 | 5,389,408 | 2,362    | 3.59               | 571                           | 2.05           |
| C        | stake site        | 24-Jun        | uncorrected | 296,712 | 5,389,168 | 2,447    | 4.20               | 575                           | 2.42           |
| D        | stake site        | 24-Jun        | uncorrected | 296,682 | 5,388,899 | 2,525    | 4.55               | 577                           | 2.63           |
| 1        | transect 1        | 23-Jun        | uncorrected | 296,547 | 5,389,364 | 2,390    | 5.95               | 585                           | 3.48           |
| 2        | transect 1        | 23-Jun        | uncorrected | 296,600 | 5,389,347 | 2,391    | 3.60               | 571                           | 2.06           |
| 3        | transect 1        | 23-Jun        | uncorrected | 296,653 | 5,389,331 | 2,392    | 4.65               | 578                           | 2.69           |
| 4        | transect 1        | 23-Jun        | uncorrected | 296,705 | 5,389,315 | 2,393    | 3.90               | 573                           | 2.23           |
| 5        | transect 1        | 23-Jun        | uncorrected | 296,757 | 5,389,299 | 2,395    | 3.73               | 572                           | 2.13           |
| 6        | transect 1        | 23-Jun        | uncorrected | 296,809 | 5,389,283 | 2,398    | 2.63               | 562                           | 1.48           |
| 7        | transect 1        | 23-Jun        | uncorrected | 296,864 | 5,389,269 | 2,405    | 2.95               | 565                           | 1.67           |
| 8        | transect 1        | 23-Jun        | uncorrected | 296,918 | 5,389,254 | 2,410    | 5.05               | 580                           | 2.93           |
| 9        | transect 1        | 23-Jun        | uncorrected | 296,974 | 5,389,239 | 2,405    | 3.33               | 569                           | 1.89           |
| 10       | transect 1        | 23-Jun        | uncorrected | 297,026 | 5,389,225 | 2,421    | 3.92               | 573                           | 2.25           |
| 11       | transect 1        | 23-Jun        | uncorrected | 297,079 | 5,389,210 | 2,442    | 4.54               | 577                           | 2.62           |
| 12       | transect 1        | 23-Jun        | uncorrected | 297,133 | 5,389,196 | 2,450    | 3.74               | 572                           | 2.14           |
| 13       | transect 1        | 23-Jun        | uncorrected | 297,184 | 5,389,183 | 2,470    | 5.93               | 585                           | 3.47           |
| 1        | transect 2        | 23-Jun        | uncorrected | 297,236 | 5,389,202 | 2,474    | 5.20               | 581                           | 3.02           |
| 2        | transect 2        | 23-Jun        | uncorrected | 297,240 | 5,389,229 | 2,464    | 5.60               | 583                           | 3.26           |
| 3        | transect 2        | 23-Jun        | uncorrected | 297,244 | 5,389,255 | 2,455    | 6.25               | 586                           | 3.66           |
| 4        | transect 2        | 23-Jun        | uncorrected | 297,248 | 5,389,281 | 2,444    | 4.45               | 577                           | 2.57           |
| 5        | transect 2        | 23-Jun        | uncorrected | 297,252 | 5,389,310 | 2,436    | 4.55               | 577                           | 2.63           |
| 6        | transect 2        | 23-Jun        | uncorrected | 297,256 | 5,389,337 | 2,427    | 4.55               | 577                           | 2.63           |
| 7        | transect 2        | 23-Jun        | uncorrected | 297,264 | 5,389,392 | 2,408    | 4.57               | 577                           | 2.64           |
| 8        | transect 2        | 23-Jun        | uncorrected | 297,271 | 5,389,446 | 2,393    | 3.55               | 570                           | 2.03           |
| 9        | transect 2        | 23-Jun        | uncorrected | 297,277 | 5,389,501 | 2,381    | 3.35               | 569                           | 1.91           |
| 10       | transect 2        | 23-Jun        | uncorrected | 297,283 | 5,389,556 | 2,369    | 3.50               | 570                           | 2.00           |
| 11       | transect 2        | 23-Jun        | uncorrected | 297,288 | 5,389,610 | 2,364    | 3.72               | 572                           | 2.13           |
| 12       | transect 2        | 23-Jun        | uncorrected | 297,293 | 5,389,665 | 2,356    | 3.40               | 569                           | 1.94           |
| 14       | transect 2        | 23-Jun        | uncorrected | 297,302 | 5,389,776 | 2,338    | 3.45               | 570                           | 1.97           |
| 15       | transect 2        | 23-Jun        | uncorrected | 297,307 | 5,389,829 | 2,326    | 3.32               | 569                           | 1.89           |
| 16       | transect 2        | 23-Jun        | uncorrected | 297,310 | 5,389,886 | 2,317    | 3.80               | 572                           | 2.17           |
| 17       | transect 2        | 23-Jun        | uncorrected | 297,282 | 5,389,883 | 2,309    | 3.05               | 566                           | 1.73           |
| 18       | transect 2        | 23-Jun        | uncorrected | 297,229 | 5,389,885 | 2,287    | 2.76               | 564                           | 1.56           |
| 1        | transect 3        | 23-Jun        | uncorrected | 297,229 | 5,389,832 | 2,301    | 3.08               | 567                           | 1.74           |
| 2        | transect 3        | 23-Jun        | uncorrected | 297,227 | 5,389,779 | 2,317    | 2.95               | 565                           | 1.67           |
| 3        | transect 3        | 23-Jun        | uncorrected | 297,186 | 5,389,744 | 2,316    | 2.54               | 561                           | 1.43           |
| 4        | transect 3        | 23-Jun        | uncorrected | 297,141 | 5,389,709 | 2,314    | 2.40               | 560                           | 1.34           |
| 5        | transect 3        | 23-Jun        | uncorrected | 297,097 | 5,389,678 | 2,310    | 2.83               | 564                           | 1.60           |
| 6        | transect 3        | 23-Jun        | uncorrected | 297,049 | 5,389,649 | 2,309    | 2.88               | 565                           | 1.63           |
| 7        | transect 3        | 23-Jun        | uncorrected | 297,002 | 5,389,620 | 2,310    | 2.97               | 566                           | 1.68           |
| 8        | transect 3        | 23-Jun        | uncorrected | 296,953 | 5,389,595 | 2,317    | 2.94               | 565                           | 1.66           |

|       |                 |        |             |         |           |       |      |     |      |
|-------|-----------------|--------|-------------|---------|-----------|-------|------|-----|------|
| 9     | transect 3      | 23-Jun | uncorrected | 296,904 | 5,389,569 | 2,323 | 2.73 | 563 | 1.54 |
| 10    | transect 3      | 23-Jun | uncorrected | 296,854 | 5,389,543 | 2,329 | 3.40 | 569 | 1.94 |
| 11    | transect 3      | 23-Jun | uncorrected | 296,804 | 5,389,517 | 2,334 | 3.41 | 569 | 1.94 |
| 12    | transect 3      | 23-Jun | uncorrected | 296,755 | 5,389,490 | 2,340 | 3.47 | 570 | 1.98 |
| 13    | transect 3      | 23-Jun | uncorrected | 296,706 | 5,389,463 | 2,347 | 3.40 | 569 | 1.94 |
| 13.1  | transect 3      | 23-Jun | uncorrected | 297,297 | 5,389,720 | 2,347 | 3.63 | 571 | 2.07 |
| 14    | transect 3      | 23-Jun | uncorrected | 296,657 | 5,389,438 | 2,356 | 3.49 | 570 | 1.99 |
| 15    | transect 3      | 23-Jun | uncorrected | 296,608 | 5,389,414 | 2,365 | 3.09 | 567 | 1.75 |
| 16    | transect 3      | 23-Jun | uncorrected | 296,556 | 5,389,395 | 2,379 | 5.78 | 584 | 3.37 |
| 1     | annual transect | 24-Jun | uncorrected | 296,723 | 5,389,256 | 2,417 | 6.00 | 585 | 3.51 |
| 2     | annual transect | 24-Jun | uncorrected | 296,716 | 5,389,208 | 2,436 | 4.45 | 577 | 2.57 |
| 3     | annual transect | 24-Jun | uncorrected | 296,712 | 5,389,157 | 2,450 | 4.15 | 575 | 2.39 |
| 4     | annual transect | 24-Jun | uncorrected | 296,703 | 5,389,107 | 2,469 | 2.63 | 562 | 1.48 |
| 5     | annual transect | 24-Jun | uncorrected | 296,697 | 5,389,057 | 2,488 | 2.38 | 559 | 1.33 |
| 6     | annual transect | 24-Jun | uncorrected | 296,691 | 5,389,005 | 2,504 | 2.70 | 563 | 1.52 |
| 7     | annual transect | 24-Jun | uncorrected | 296,687 | 5,388,955 | 2,518 | 3.88 | 573 | 2.22 |
| 8     | annual transect | 24-Jun | uncorrected | 296,683 | 5,388,901 | 2,533 | 4.79 | 579 | 2.77 |
| 9     | annual transect | 24-Jun | uncorrected | 296,677 | 5,388,851 | 2,567 | 5.81 | 584 | 3.39 |
| 10    | annual transect | 24-Jun | uncorrected | 296,671 | 5,388,802 | 2,570 | 4.15 | 575 | 2.39 |
| 13    | annual transect | 24-Jun | uncorrected | 296,739 | 5,389,355 | 2,380 | 3.62 | 571 | 2.07 |
| 14    | annual transect | 24-Jun | uncorrected | 296,745 | 5,389,406 | 2,365 | 3.15 | 567 | 1.79 |
| 15    | annual transect | 24-Jun | uncorrected | 296,753 | 5,389,459 | 2,350 | 2.85 | 564 | 1.61 |
| 16    | annual transect | 24-Jun | uncorrected | 296,760 | 5,389,512 | 2,336 | 3.55 | 570 | 2.03 |
| 17    | annual transect | 24-Jun | uncorrected | 296,767 | 5,389,566 | 2,326 | 3.08 | 567 | 1.74 |
| 18    | annual transect | 24-Jun | uncorrected | 296,776 | 5,389,619 | 2,314 | 2.69 | 563 | 1.51 |
| 19    | annual transect | 24-Jun | uncorrected | 296,783 | 5,389,671 | 2,298 | 2.50 | 561 | 1.40 |
| 1     | transect 5      | 24-Jun | uncorrected | 296,648 | 5,388,850 | 2,553 | 6.80 | 588 | 4.00 |
| 2     | transect 5      | 24-Jun | uncorrected | 296,621 | 5,388,851 | 2,552 | 7.00 | 589 | 4.12 |
| 3     | transect 5      | 24-Jun | uncorrected | 296,594 | 5,388,852 | 2,554 | 6.85 | 589 | 4.03 |
| 4     | transect 5      | 24-Jun | uncorrected | 296,567 | 5,388,853 | 2,557 | 6.15 | 586 | 3.60 |
| 5     | transect 5      | 24-Jun | uncorrected | 296,543 | 5,388,852 | 2,567 | 5.43 | 582 | 3.16 |
| 6     | transect 5      | 24-Jun | uncorrected | 296,704 | 5,388,849 | 2,549 | 6.60 | 588 | 3.88 |
| 7     | transect 5      | 24-Jun | uncorrected | 296,736 | 5,388,852 | 2,552 | 7.00 | 589 | 4.12 |
| 8     | transect 5      | 24-Jun | uncorrected | 296,763 | 5,388,849 | 2,552 | 5.46 | 582 | 3.18 |
| 9     | transect 5      | 24-Jun | uncorrected | 296,789 | 5,388,848 | 2,554 | 5.21 | 581 | 3.03 |
| 10    | transect 5      | 24-Jun | uncorrected | 296,815 | 5,388,847 | 2,556 | 5.73 | 584 | 3.34 |
| 11    | transect 5      | 24-Jun | uncorrected | 296,841 | 5,388,843 | 2,562 | 7.00 | 589 | 4.12 |
| 12    | transect 5      | 24-Jun | uncorrected | 296,866 | 5,388,840 | 2,565 | 6.47 | 587 | 3.80 |
| lower | density pit     | 25-Jun | uncorrected | 296,747 | 5,389,410 | 2,360 | 3.10 | 567 | 1.76 |
| upper | density pit     | 26-Jun | uncorrected | 296,682 | 5,388,897 | 2,522 | 4.55 | 577 | 2.63 |
| bare  |                 |        |             |         |           |       |      |     |      |
| ice   | bare ice        | 23-Jun | Corrected   | 296,530 | 5,389,176 | 2,459 | 0.00 | 0   | 0.00 |

---

|                |      |      |     |      |
|----------------|------|------|-----|------|
| <b>Count:</b>  | 82   | 82   | 82  | 82   |
| <b>Mean:</b>   | 2417 | 4.10 | 566 | 2.36 |
| <b>Median:</b> | 2397 | 3.68 | 571 | 2.10 |
| <b>StdDev:</b> | 87   | 1.38 | 64  | 0.83 |
| <b>Min:</b>    | 2287 | 0.00 | 0   | 0.00 |
| <b>Max:</b>    | 2570 | 7.00 | 589 | 4.12 |
| <b>Range:</b>  | 283  | 7.00 | 589 | 4.12 |

**Table S2:** 2006 snow depths

**Coordinates:** NAD83 UTM Zone 12N

| <b>2006</b> |                   |               |             |         |           |          |                    |                     |                               |                |
|-------------|-------------------|---------------|-------------|---------|-----------|----------|--------------------|---------------------|-------------------------------|----------------|
| Point ID    | Measurement Group | Date Measured | GPS         | Easting | Northing  | Elev (m) | Measured Depth (m) | Depth on June 8 (m) | Density (kg m <sup>-3</sup> ) | b <sub>w</sub> |
| A           | stake site        | 26-Jun        | corrected   | 296,747 | 5,389,410 | 2,360    | 4.07               | 4.64                | 578                           | 2.68           |
| C           | stake site        | 26-Jun        | uncorrected | 296,712 | 5,389,168 | 2,447    | 4.43               | 4.97                | 580                           | 2.88           |
| D           | stake site        | 28-Jun        | uncorrected | 296,682 | 5,388,899 | 2,525    | 5.55               | 6.15                | 586                           | 3.60           |
| h           | stake site        | 26-Jun        | uncorrected | 296,853 | 5,389,132 | 2,453    | 4.83               | 5.43                | 582                           | 3.16           |
| G           | stake site        | 26-Jun        | uncorrected | 297,004 | 5,389,140 | 2,467    | 3.88               | 4.48                | 577                           | 2.58           |
| i           | stake site        | 26-Jun        | corrected   | 297,262 | 5,389,277 | 2,465    | 7.00               | 7.54                | 591                           | 4.46           |
| j           | stake site        | 26-Jun        | corrected   | 297,271 | 5,389,447 | 2,407    | 4.10               | 4.64                | 578                           | 2.68           |
| k           | stake site        | 26-Jun        | corrected   | 297,098 | 5,389,343 | 2,409    | 3.45               | 4.99                | 580                           | 2.89           |
| l           | stake site        | 27-Jun        | corrected   | 297,024 | 5,389,454 | 2,364    | 3.50               | 4.07                | 574                           | 2.34           |
| m           | stake site        | 26-Jun        | corrected   | 297,235 | 5,389,643 | 2,359    | 3.48               | 3.99                | 574                           | 2.29           |
| n           | stake site        | 26-Jun        | corrected   | 297,255 | 5,389,891 | 2,309    | 3.80               | 4.33                | 576                           | 2.49           |
| o           | stake site        | 26-Jun        | corrected   | 297,004 | 5,389,650 | 2,311    | 3.38               | 3.92                | 573                           | 2.25           |
| E           | stake site        | 26-Jun        | corrected   | 296,425 | 5,389,185 | 2,447    | 2.82               | 3.39                | 569                           | 1.93           |
| p           | stake site        | 28-Jun        | corrected   | 296,525 | 5,388,968 | 2,530    | 6.85               | 7.45                | 591                           | 4.40           |
| q           | stake site        | 28-Jun        | corrected   | 296,845 | 5,388,960 | 2,533    | 4.15               | 4.75                | 578                           | 2.75           |
| 2           | transect 1        | 23-Jun        | corrected   | 296,528 | 5,389,273 | 2,428    | 3.40               | 3.85                | 573                           | 2.20           |
| 3           | transect 1        | 23-Jun        | corrected   | 296,593 | 5,389,270 | 2,432    | 3.50               | 3.95                | 573                           | 2.26           |
| 4           | transect 1        | 23-Jun        | corrected   | 296,655 | 5,389,260 | 2,432    | 3.50               | 3.95                | 573                           | 2.26           |
| 5           | transect 1        | 23-Jun        | corrected   | 296,717 | 5,389,245 | 2,432    | 3.24               | 3.69                | 572                           | 2.11           |
| 6           | transect 1        | 23-Jun        | corrected   | 296,776 | 5,389,225 | 2,431    | 5.95               | 6.40                | 587                           | 3.75           |
| 7           | transect 1        | 23-Jun        | corrected   | 296,837 | 5,389,218 | 2,435    | 3.50               | 3.95                | 573                           | 2.26           |
| 8           | transect 1        | 23-Jun        | corrected   | 296,901 | 5,389,213 | 2,438    | 5.35               | 5.80                | 584                           | 3.39           |
| 9           | transect 1        | 23-Jun        | corrected   | 296,965 | 5,389,212 | 2,441    | 5.70               | 6.15                | 586                           | 3.60           |
| 11          | transect 1        | 23-Jun        | uncorrected | 297,079 | 5,389,210 | 2,442    | 5.74               | 6.19                | 586                           | 3.63           |
| 1           | transect 106      | 8-Jun         | corrected   | 297,295 | 5,389,940 | 2,317    | 6.02               | 6.02                | 585                           | 3.52           |
| 2           | transect 106      | 8-Jun         | corrected   | 297,254 | 5,389,889 | 2,309    | 4.71               | 4.71                | 578                           | 2.72           |
| 3           | transect 106      | 8-Jun         | corrected   | 297,207 | 5,389,839 | 2,307    | 4.67               | 4.67                | 578                           | 2.70           |
| 4           | transect 106      | 8-Jun         | corrected   | 297,158 | 5,389,792 | 2,304    | 3.86               | 3.86                | 573                           | 2.21           |
| 5           | transect 106      | 8-Jun         | corrected   | 297,108 | 5,389,744 | 2,308    | 3.54               | 3.54                | 570                           | 2.02           |
| 6           | transect 106      | 8-Jun         | corrected   | 297,057 | 5,389,697 | 2,311    | 3.46               | 3.46                | 570                           | 1.97           |
| 7           | transect 106      | 8-Jun         | corrected   | 297,006 | 5,389,652 | 2,310    | 4.29               | 4.29                | 576                           | 2.47           |
| 8           | transect 106      | 8-Jun         | corrected   | 296,953 | 5,389,610 | 2,323    | 4.38               | 4.38                | 576                           | 2.52           |
| 9           | transect 106      | 8-Jun         | corrected   | 296,901 | 5,389,567 | 2,335    | 4.02               | 4.02                | 574                           | 2.31           |
| 10          | transect 106      | 8-Jun         | corrected   | 296,849 | 5,389,525 | 2,346    | 4.52               | 4.52                | 577                           | 2.61           |
| 11          | transect 106      | 8-Jun         | corrected   | 296,798 | 5,389,476 | 2,364    | 4.57               | 4.57                | 577                           | 2.64           |
| 12          | transect 106      | 8-Jun         | corrected   | 296,745 | 5,389,438 | 2,369    | 4.37               | 4.37                | 576                           | 2.52           |
| 13          | transect 106      | 8-Jun         | corrected   | 296,692 | 5,389,396 | 2,384    | 5.28               | 5.28                | 581                           | 3.07           |
| 14          | transect 106      | 8-Jun         | corrected   | 296,638 | 5,389,355 | 2,400    | 5.57               | 5.57                | 583                           | 3.25           |
| 15          | transect 106      | 8-Jun         | corrected   | 296,584 | 5,389,315 | 2,416    | 3.23               | 3.23                | 568                           | 1.83           |
| 16          | transect 106      | 8-Jun         | corrected   | 296,529 | 5,389,273 | 2,427    | 4.36               | 4.36                | 576                           | 2.51           |

|      |                 |        |             |         |           |       |      |      |     |      |
|------|-----------------|--------|-------------|---------|-----------|-------|------|------|-----|------|
| 17   | transect 106    | 8-Jun  | corrected   | 296,476 | 5,389,231 | 2,439 | 0.82 | 0.82 | 530 | 0.43 |
| 17.5 | transect 106    | 8-Jun  | corrected   | 296,450 | 5,389,208 | 2,441 | 2.44 | 2.44 | 560 | 1.37 |
| 18   | transect 106    | 8-Jun  | corrected   | 296,423 | 5,389,187 | 2,446 | 3.25 | 3.25 | 568 | 1.85 |
| 18.5 | transect 106    | 8-Jun  | corrected   | 296,396 | 5,389,167 | 2,454 | 3.89 | 3.89 | 573 | 2.23 |
| 1    | transect 2      | 8-Jun  | corrected   | 297,383 | 5,389,644 | 2,382 | 5.73 | 5.73 | 584 | 3.34 |
| 1.5  | transect 2      | 8-Jun  | corrected   | 297,360 | 5,389,619 | 2,378 | 6.10 | 6.10 | 585 | 3.57 |
| 2    | transect 2      | 8-Jun  | corrected   | 297,336 | 5,389,597 | 2,381 | 5.24 | 5.24 | 581 | 3.05 |
| 2.5  | transect 2      | 8-Jun  | corrected   | 297,312 | 5,389,571 | 2,386 | 5.37 | 5.37 | 582 | 3.12 |
| 3    | transect 2      | 8-Jun  | corrected   | 297,287 | 5,389,547 | 2,388 | 4.99 | 4.99 | 580 | 2.89 |
| 4    | transect 2      | 8-Jun  | corrected   | 297,239 | 5,389,497 | 2,387 | 4.17 | 4.17 | 575 | 2.40 |
| 5    | transect 2      | 8-Jun  | corrected   | 297,193 | 5,389,445 | 2,389 | 3.84 | 3.84 | 573 | 2.20 |
| 6    | transect 2      | 8-Jun  | corrected   | 297,146 | 5,389,394 | 2,399 | 4.52 | 4.52 | 577 | 2.61 |
| 7    | transect 2      | 8-Jun  | corrected   | 297,098 | 5,389,343 | 2,411 | 4.06 | 4.06 | 574 | 2.33 |
| 8    | transect 2      | 8-Jun  | corrected   | 297,048 | 5,389,291 | 2,430 | 3.78 | 3.78 | 572 | 2.16 |
| 9    | transect 2      | 8-Jun  | corrected   | 297,000 | 5,389,243 | 2,439 | 2.96 | 2.96 | 565 | 1.67 |
| 10   | transect 2      | 10-Jun | corrected   | 296,953 | 5,389,195 | 2,449 | 4.46 | 4.52 | 577 | 2.61 |
| 11   | transect 2      | 10-Jun | corrected   | 296,901 | 5,389,145 | 2,463 | 4.46 | 4.52 | 577 | 2.61 |
| 12   | transect 2      | 10-Jun | corrected   | 296,851 | 5,389,095 | 2,477 | 4.05 | 4.11 | 574 | 2.36 |
| 13   | transect 2      | 10-Jun | corrected   | 296,799 | 5,389,051 | 2,497 | 5.01 | 5.07 | 580 | 2.94 |
| 14   | transect 2      | 10-Jun | corrected   | 296,747 | 5,389,005 | 2,514 | 3.08 | 3.14 | 567 | 1.78 |
| 15   | transect 2      | 10-Jun | corrected   | 296,694 | 5,388,959 | 2,528 | 4.72 | 4.78 | 579 | 2.77 |
| 15.5 | transect 2      | 10-Jun | corrected   | 296,669 | 5,388,936 | 2,535 | 5.63 | 5.69 | 583 | 3.32 |
| 16   | transect 2      | 10-Jun | corrected   | 296,643 | 5,388,912 | 2,543 | 5.73 | 5.79 | 584 | 3.38 |
| 16.5 | transect 2      | 10-Jun | corrected   | 296,619 | 5,388,887 | 2,552 | 6.56 | 6.62 | 588 | 3.89 |
| 17   | transect 2      | 10-Jun | corrected   | 296,594 | 5,388,863 | 2,563 | 6.84 | 6.90 | 589 | 4.06 |
| 1    | transect 3      | 10-Jun | corrected   | 296,499 | 5,388,939 | 2,549 | 4.41 | 4.47 | 577 | 2.58 |
| 1.5  | transect 3      | 10-Jun | corrected   | 296,524 | 5,388,963 | 2,537 | 6.62 | 6.68 | 588 | 3.93 |
| 2    | transect 3      | 10-Jun | corrected   | 296,545 | 5,388,988 | 2,520 | 5.62 | 5.68 | 583 | 3.31 |
| 2.5  | transect 3      | 10-Jun | corrected   | 296,571 | 5,389,011 | 2,509 | 5.59 | 5.65 | 583 | 3.30 |
| 3    | transect 3      | 10-Jun | corrected   | 296,596 | 5,389,035 | 2,503 | 5.13 | 5.19 | 581 | 3.01 |
| 3.5  | transect 3      | 10-Jun | corrected   | 296,622 | 5,389,060 | 2,499 | 4.38 | 4.44 | 577 | 2.56 |
| 4    | transect 3      | 10-Jun | corrected   | 296,646 | 5,389,085 | 2,492 | 4.35 | 4.41 | 576 | 2.54 |
| 5    | transect 3      | 10-Jun | corrected   | 296,693 | 5,389,135 | 2,471 | 4.02 | 4.08 | 574 | 2.34 |
| 6    | transect 3      | 10-Jun | corrected   | 296,741 | 5,389,183 | 2,449 | 4.56 | 4.62 | 578 | 2.67 |
| 7    | transect 3      | 10-Jun | corrected   | 296,784 | 5,389,233 | 2,429 | 4.60 | 4.66 | 578 | 2.69 |
| 8    | transect 3      | 10-Jun | corrected   | 296,830 | 5,389,286 | 2,414 | 5.00 | 5.06 | 580 | 2.94 |
| 9    | transect 3      | 10-Jun | corrected   | 296,876 | 5,389,337 | 2,400 | 3.38 | 3.44 | 570 | 1.96 |
| 10   | transect 3      | 10-Jun | corrected   | 296,922 | 5,389,387 | 2,382 | 4.40 | 4.46 | 577 | 2.57 |
| 11   | transect 3      | 10-Jun | corrected   | 296,967 | 5,389,437 | 2,366 | 4.41 | 4.47 | 577 | 2.58 |
| 12   | transect 3      | 23-Jun | corrected   | 297,016 | 5,389,485 | 2,356 | 3.58 | 4.03 | 574 | 2.31 |
| 12.5 | transect 3      | 10-Jun | corrected   | 297,015 | 5,389,485 | 2,357 | 3.98 | 4.04 | 574 | 2.32 |
| 13   | transect 3      | 23-Jun | corrected   | 297,070 | 5,389,519 | 2,355 | 2.62 | 3.07 | 566 | 1.74 |
| 14   | transect 3      | 23-Jun | corrected   | 297,122 | 5,389,552 | 2,353 | 3.02 | 3.47 | 570 | 1.98 |
| 15   | transect 3      | 23-Jun | corrected   | 297,173 | 5,389,592 | 2,356 | 3.91 | 4.36 | 576 | 2.51 |
| 16   | transect 3      | 23-Jun | corrected   | 297,222 | 5,389,626 | 2,357 | 3.56 | 4.01 | 574 | 2.30 |
| 17   | transect 3      | 23-Jun | corrected   | 297,271 | 5,389,664 | 2,364 | 3.62 | 4.07 | 574 | 2.34 |
| 18   | transect 3      | 23-Jun | corrected   | 297,320 | 5,389,704 | 2,366 | 3.53 | 3.98 | 574 | 2.28 |
| 18.5 | transect 3      | 23-Jun | corrected   | 297,344 | 5,389,725 | 2,364 | 3.80 | 4.25 | 575 | 2.45 |
| 1    | annual transect | 23-Jun | uncorrected | 296,723 | 5,389,256 | 2,417 | 3.92 | 4.37 | 576 | 2.52 |

|                      |                 |        |             |         |           |       |      |      |     |      |
|----------------------|-----------------|--------|-------------|---------|-----------|-------|------|------|-----|------|
| 2                    | annual transect | 23-Jun | uncorrected | 296,716 | 5,389,208 | 2,436 | 5.00 | 5.45 | 582 | 3.17 |
| 3                    | annual transect | 23-Jun | uncorrected | 296,712 | 5,389,157 | 2,450 | 5.75 | 6.20 | 586 | 3.63 |
| 4                    | annual transect | 23-Jun | uncorrected | 296,703 | 5,389,107 | 2,469 | 3.27 | 3.72 | 572 | 2.13 |
| 5                    | annual transect | 23-Jun | uncorrected | 296,697 | 5,389,057 | 2,488 | 2.95 | 3.40 | 569 | 1.94 |
| 6                    | annual transect | 23-Jun | uncorrected | 296,691 | 5,389,005 | 2,504 | 3.62 | 4.07 | 574 | 2.34 |
| 7                    | annual transect | 23-Jun | uncorrected | 296,687 | 5,388,955 | 2,518 | 4.95 | 5.40 | 582 | 3.14 |
| 8                    | annual transect | 23-Jun | uncorrected | 296,683 | 5,388,901 | 2,533 | 6.05 | 6.50 | 587 | 3.82 |
| 9                    | annual transect | 23-Jun | uncorrected | 296,677 | 5,388,851 | 2,567 | 7.10 | 7.55 | 591 | 4.46 |
| 10                   | annual transect | 23-Jun | uncorrected | 296,671 | 5,388,802 | 2,570 | 7.40 | 7.85 | 592 | 4.65 |
| 11                   | annual transect | 23-Jun | uncorrected | 296,662 | 5,388,778 | 2,582 | 9.03 | 9.48 | 597 | 5.66 |
| 13                   | annual transect | 23-Jun | uncorrected | 296,739 | 5,389,355 | 2,380 | 5.12 | 5.57 | 583 | 3.25 |
| 14                   | annual transect | 23-Jun | uncorrected | 296,745 | 5,389,406 | 2,365 | 4.15 | 4.60 | 578 | 2.66 |
| 15                   | annual transect | 23-Jun | uncorrected | 296,753 | 5,389,459 | 2,350 | 3.78 | 4.23 | 575 | 2.43 |
| 16                   | annual transect | 23-Jun | uncorrected | 296,760 | 5,389,512 | 2,336 | 3.80 | 4.25 | 575 | 2.45 |
| 17                   | annual transect | 23-Jun | uncorrected | 296,767 | 5,389,566 | 2,326 | 4.35 | 4.80 | 579 | 2.78 |
| 18                   | annual transect | 23-Jun | uncorrected | 296,776 | 5,389,619 | 2,314 | 3.87 | 4.32 | 576 | 2.49 |
| 19                   | annual transect | 23-Jun | uncorrected | 296,783 | 5,389,671 | 2,298 | 2.25 | 2.70 | 563 | 1.52 |
| 1                    | transect 5      | 23-Jun | uncorrected | 296,648 | 5,388,850 | 2,553 | 6.90 | 7.35 | 590 | 4.34 |
| 3                    | transect 5      | 23-Jun | uncorrected | 296,594 | 5,388,852 | 2,554 | 8.80 | 9.25 | 597 | 5.52 |
| lower<br>bare<br>ice | density pit     | 10-Jun | uncorrected | 296,746 | 5,389,409 | 2,362 | 4.64 | 4.70 | 578 | 2.72 |
|                      | bare ice        | 8-Jun  | corrected   | 296,530 | 5,389,176 | 2,459 | 0.00 | 0.00 | 0   | 0.00 |

---

|                |      |    |      |     |      |
|----------------|------|----|------|-----|------|
| <b>Count:</b>  | 110  | na | 110  | 110 | 110  |
| <b>Mean:</b>   | 2424 | na | 4.73 | 572 | 2.74 |
| <b>Median:</b> | 2429 | na | 4.48 | 577 | 2.58 |
| <b>StdDev:</b> | 75   | na | 1.39 | 56  | 0.84 |
| <b>Min:</b>    | 2298 | na | 0.00 | 0   | 0.00 |
| <b>Max:</b>    | 2582 | na | 9.48 | 597 | 5.66 |
| <b>Range:</b>  | 285  | na | 9.48 | 597 | 5.66 |



**Table S3:** 2007 snow depths  
**Coordinates:** NAD83 UTM Zone 12N

| 2007     |                   |               |           |         |           |          |                    |                     |                               |                |
|----------|-------------------|---------------|-----------|---------|-----------|----------|--------------------|---------------------|-------------------------------|----------------|
| Point ID | Measurement Group | Date Measured | GPS       | Easting | Northing  | Elev (m) | Measured Depth (m) | Depth on May 26 (m) | Density (kg m <sup>-3</sup> ) | b <sub>w</sub> |
| E        | stake site        | 22-Jun        | corrected | 296,420 | 5,389,180 | 2,445    | 2.25               | 3.33                | 467                           | 1.56           |
| r        | stake site        | 23-Jun        | corrected | 296,518 | 5,389,019 | 2,509    | 3.80               | 4.92                | 467                           | 2.30           |
| D        | stake site        | 23-Jun        | corrected | 296,656 | 5,388,895 | 2,547    | 5.31               | 6.43                | 467                           | 3.00           |
| q        | stake site        | 23-Jun        | corrected | 296,854 | 5,388,990 | 2,521    | 3.70               | 4.82                | 467                           | 2.25           |
| s        | stake site        | 23-Jun        | corrected | 297,307 | 5,389,468 | 2,407    | 4.83               | 5.95                | 467                           | 2.78           |
| t        | stake site        | 24-Jun        | corrected | 297,234 | 5,389,813 | 2,317    | 3.50               | 4.66                | 467                           | 2.18           |
| F        | stake site        | 24-Jun        | corrected | 297,158 | 5,389,554 | 2,354    | 4.20               | 5.36                | 467                           | 2.50           |
| C        | stake site        | 24-Jun        | corrected | 296,753 | 5,389,173 | 2,450    | 3.50               | 4.66                | 467                           | 2.18           |
| 1        | transect met      | 24-Jun        | corrected | 297,158 | 5,389,554 | 2,354    | 4.15               | 5.37                | 467                           | 2.51           |
| 2        | transect met      | 24-Jun        | corrected | 297,116 | 5,389,529 | 2,355    | 4.00               | 5.22                | 467                           | 2.44           |
| 3        | transect met      | 24-Jun        | corrected | 297,098 | 5,389,516 | 2,357    | 3.85               | 5.07                | 467                           | 2.37           |
| 4        | transect met      | 24-Jun        | corrected | 297,058 | 5,389,470 | 2,362    | 3.45               | 4.67                | 467                           | 2.18           |
| 5        | transect met      | 24-Jun        | corrected | 297,016 | 5,389,424 | 2,369    | 3.36               | 4.58                | 467                           | 2.14           |
| 6        | transect met      | 24-Jun        | corrected | 296,975 | 5,389,378 | 2,382    | 3.63               | 4.85                | 467                           | 2.26           |
| 7        | transect met      | 24-Jun        | corrected | 296,933 | 5,389,333 | 2,399    | 4.35               | 5.57                | 467                           | 2.60           |
| 8        | transect met      | 24-Jun        | corrected | 296,891 | 5,389,288 | 2,414    | 2.84               | 4.06                | 467                           | 1.90           |
| 1        | annual transect   | 26-May        | corrected | 296,712 | 5,389,157 | 2,459    | 4.85               | 4.85                | 467                           | 2.26           |
| 2        | annual transect   | 26-May        | corrected | 296,703 | 5,389,108 | 2,479    | 3.25               | 3.25                | 467                           | 1.52           |
| 3        | annual transect   | 26-May        | corrected | 296,696 | 5,389,058 | 2,497    | 2.70               | 2.70                | 467                           | 1.26           |
| 4        | annual transect   | 26-May        | corrected | 296,691 | 5,389,005 | 2,513    | 2.75               | 2.75                | 467                           | 1.28           |
| 5        | annual transect   | 26-May        | corrected | 296,688 | 5,388,956 | 2,527    | 4.35               | 4.35                | 467                           | 2.03           |
| 6        | annual transect   | 26-May        | corrected | 296,683 | 5,388,901 | 2,544    | 5.35               | 5.35                | 467                           | 2.50           |
| 7        | annual transect   | 26-May        | corrected | 296,678 | 5,388,850 | 2,565    | 5.55               | 5.55                | 467                           | 2.59           |
| 8        | annual transect   | 26-May        | corrected | 296,718 | 5,388,807 | 2,585    | 7.50               | 7.50                | 467                           | 3.50           |
| 9        | annual transect   | 26-May        | corrected | 296,807 | 5,388,759 | 2,606    | 8.15               | 8.15                | 467                           | 3.81           |
| 10       | annual transect   | 26-May        | corrected | 296,805 | 5,388,736 | 2,615    | 5.70               | 5.70                | 467                           | 2.66           |
| 12       | annual transect   | 26-May        | corrected | 296,776 | 5,389,622 | 2,324    | 3.41               | 3.41                | 467                           | 1.59           |
| 13       | annual transect   | 26-May        | corrected | 296,767 | 5,389,567 | 2,339    | 5.44               | 5.44                | 467                           | 2.54           |
| 14       | annual transect   | 26-May        | corrected | 296,760 | 5,389,511 | 2,349    | 5.60               | 5.60                | 467                           | 2.62           |
| 15       | annual transect   | 26-May        | corrected | 296,754 | 5,389,460 | 2,364    | 5.95               | 5.95                | 467                           | 2.78           |
| 16(a)    | annual transect   | 26-May        | corrected | 296,746 | 5,389,421 | 2,374    | 3.85               | 3.85                | 467                           | 1.80           |
| 16(b)    | annual transect   | 26-May        | corrected | 296,741 | 5,389,424 | 2,374    | 5.00               | 5.00                | 467                           | 2.34           |
| 17       | annual transect   | 26-May        | corrected | 296,746 | 5,389,407 | 2,379    | 5.80               | 5.80                | 467                           | 2.71           |
| 18       | annual transect   | 26-May        | corrected | 296,739 | 5,389,358 | 2,394    | 5.80               | 5.80                | 467                           | 2.71           |
| 20       | annual transect   | 26-May        | corrected | 296,733 | 5,389,306 | 2,411    | 5.50               | 5.50                | 467                           | 2.57           |
| 21       | annual transect   | 26-May        | corrected | 296,724 | 5,389,256 | 2,427    | 6.55               | 6.55                | 467                           | 3.06           |
| 22       | annual transect   | 26-May        | corrected | 296,718 | 5,389,209 | 2,443    | 5.50               | 5.50                | 467                           | 2.57           |

|          |                  |        |             |         |           |       |      |      |     |      |
|----------|------------------|--------|-------------|---------|-----------|-------|------|------|-----|------|
| lower    | density pit      | 16-May | uncorrected | 296,767 | 5,389,433 | 2,358 | 5.29 | 4.87 | 467 | 2.27 |
| 1        | additional point | 15-May | corrected   | 297,256 | 5,389,886 | 2,308 | 5.37 | 4.91 | 467 | 2.29 |
| bare ice | bare ice         | 26-May | corrected   | 296,530 | 5,389,176 | 2,459 | 0.00 | 0.00 | 0   | 0.00 |

|                |      |    |      |     |      |
|----------------|------|----|------|-----|------|
| <b>Count:</b>  | 40   | na | 40   | 40  | 40   |
| <b>Mean:</b>   | 2431 | na | 4.95 | 455 | 2.31 |
| <b>Median:</b> | 2409 | na | 5.04 | 467 | 2.35 |
| <b>StdDev:</b> | 85   | na | 1.37 | 74  | 0.64 |
| <b>Min:</b>    | 2308 | na | 0.00 | 0   | 0.00 |
| <b>Max:</b>    | 2615 | na | 8.15 | 467 | 3.81 |
| <b>Range:</b>  | 307  | na | 8.15 | 467 | 3.81 |

**Table S4:** 2008 snow depths

**Coordinates:** NAD83 UTM Zone 12N

## 2008

| Point ID | Measurement Group | Date Measured | GPS         | Easting | Northing  | Elev (m) | Measured Depth (m) | Depth on June 16 (m) | Density (kg m <sup>-3</sup> ) | b <sub>w</sub> |
|----------|-------------------|---------------|-------------|---------|-----------|----------|--------------------|----------------------|-------------------------------|----------------|
| A        | stake site        | 9-Jul         | uncorrected | 296,746 | 5,389,407 | 2,365    | 4.00               | 5.85                 | 463                           | 2.71           |
| B        | stake site        | 9-Jul         | uncorrected | 296,993 | 5,389,588 | 2,326    | 4.60               | 6.45                 | 463                           | 2.99           |
| C        | stake site        | 10-Jul        | uncorrected | 296,712 | 5,389,167 | 2,454    | 5.10               | 6.75                 | 463                           | 3.13           |
| D        | stake site        | 10-Jul        | uncorrected | 296,682 | 5,388,898 | 2,542    | 6.75               | 8.15                 | 463                           | 3.77           |
| E        | stake site        | 10-Jul        | uncorrected | 296,441 | 5,389,174 | 2,449    | 2.85               | 4.55                 | 463                           | 2.11           |
| F        | stake site        | 10-Jul        | uncorrected | 297,158 | 5,389,555 | 2,353    | 5.30               | 6.95                 | 463                           | 3.22           |
| G        | stake site        | 10-Jul        | uncorrected | 297,004 | 5,389,140 | 2,475    | 5.00               | 6.45                 | 463                           | 2.99           |
| 4        | annual transect   | 16-Jun        | uncorrected | 296,784 | 5,389,672 | 2,300    | 4.60               | 4.60                 | 463                           | 2.13           |
| 5        | annual transect   | 16-Jun        | uncorrected | 296,775 | 5,389,618 | 2,322    | 4.92               | 4.92                 | 463                           | 2.28           |
| 8        | annual transect   | 16-Jun        | uncorrected | 296,753 | 5,389,489 | 2,354    | 5.86               | 5.86                 | 463                           | 2.71           |
| lower    | density pit       | 16-Jun        | corrected   | 296,742 | 5,389,419 | 2,375    | 6.50               | 6.50                 | 463                           | 3.01           |
| bare ice | bare ice          | 16-Jun        | corrected   | 296,530 | 5,389,176 | 2,459    | 0.00               | 0.00                 | 0                             | 0.00           |

|                |      |    |      |     |      |
|----------------|------|----|------|-----|------|
| <b>Count:</b>  | 12   | na | 12   | 12  | 12   |
| <b>Mean:</b>   | 2398 | na | 5.59 | 424 | 2.59 |
| <b>Median:</b> | 2370 | na | 6.16 | 463 | 2.85 |
| <b>StdDev:</b> | 75   | na | 2.04 | 134 | 0.95 |
| <b>Min:</b>    | 2300 | na | 0.00 | 0   | 0.00 |
| <b>Max:</b>    | 2542 | na | 8.15 | 463 | 3.77 |
| <b>Range:</b>  | 242  | na | 8.15 | 463 | 3.77 |

**Table S5:** 2009 snow depths  
**Coordinates:** NAD83 UTM Zone 12N

| 2009     |                   |               |             |         |           |          |                    |                      |                               |                |
|----------|-------------------|---------------|-------------|---------|-----------|----------|--------------------|----------------------|-------------------------------|----------------|
| Point ID | Measurement Group | Date Measured | GPS         | Easting | Northing  | Elev (m) | Measured Depth (m) | Depth on June 16 (m) | Density (kg m <sup>-3</sup> ) | b <sub>w</sub> |
| A        | stake site        | 25-Jun        | corrected   | 296,749 | 5,389,407 | 2,376    | 3.30               | 3.55                 | 570                           | 2.03           |
| B        | stake site        | 25-Jun        | corrected   | 296,994 | 5,389,586 | 2,326    | 3.50               | 3.75                 | 572                           | 2.14           |
| D        | stake site        | 25-Jun        | corrected   | 296,682 | 5,388,899 | 2,543    | 6.35               | 6.60                 | 588                           | 3.88           |
| E        | stake site        | 25-Jun        | corrected   | 296,453 | 5,389,183 | 2,449    | 1.95               | 2.20                 | 557                           | 1.23           |
| F        | stake site        | 25-Jun        | corrected   | 297,158 | 5,389,555 | 2,352    | 3.75               | 4.00                 | 574                           | 2.29           |
| G        | stake site        | 25-Jun        | corrected   | 297,004 | 5,389,142 | 2,475    | 3.50               | 3.75                 | 572                           | 2.14           |
| 1        | additional point  | 25-Jun        | corrected   | 296,798 | 5,389,473 | 2,360    | 3.10               | 3.35                 | 569                           | 1.91           |
| 2        | additional point  | 25-Jun        | corrected   | 296,744 | 5,389,436 | 2,367    | 3.48               | 3.73                 | 572                           | 2.13           |
| 3        | additional point  | 25-Jun        | corrected   | 296,742 | 5,389,181 | 2,450    | 3.43               | 3.68                 | 571                           | 2.10           |
| 4        | additional point  | 25-Jun        | corrected   | 296,693 | 5,389,134 | 2,471    | 2.82               | 3.07                 | 566                           | 1.74           |
| 5        | additional point  | 25-Jun        | corrected   | 296,692 | 5,389,396 | 2,382    | 4.27               | 4.52                 | 577                           | 2.61           |
| 1        | transect A        | 25-Jun        | corrected   | 296,401 | 5,389,164 | 2,453    | 3.16               | 3.16                 | 567                           | 1.79           |
| 2        | transect A        | 16-Jun        | corrected   | 296,425 | 5,389,187 | 2,444    | 2.57               | 2.57                 | 562                           | 1.44           |
| 3        | transect A        | 16-Jun        | corrected   | 296,450 | 5,389,205 | 2,440    | 2.19               | 2.19                 | 557                           | 1.22           |
| 4        | transect A        | 16-Jun        | corrected   | 296,476 | 5,389,230 | 2,437    | 0.15               | 0.15                 | 483                           | 0.07           |
| 5        | transect A        | 16-Jun        | corrected   | 296,591 | 5,389,272 | 2,428    | 3.66               | 3.66                 | 571                           | 2.09           |
| 6        | transect A        | 16-Jun        | corrected   | 296,628 | 5,389,359 | 2,397    | 4.67               | 4.67                 | 578                           | 2.70           |
| 7        | transect A        | 16-Jun        | corrected   | 296,694 | 5,389,397 | 2,381    | 4.57               | 4.57                 | 577                           | 2.64           |
| 8        | transect A        | 16-Jun        | corrected   | 296,745 | 5,389,436 | 2,368    | 3.82               | 3.82                 | 572                           | 2.19           |
| 9        | transect A        | 16-Jun        | corrected   | 296,799 | 5,389,473 | 2,358    | 3.37               | 3.37                 | 569                           | 1.92           |
| 10       | transect A        | 16-Jun        | uncorrected | 296,851 | 5,389,524 | 2,343    | 3.77               | 3.77                 | 572                           | 2.16           |
| 10.5     | transect A        | 16-Jun        | uncorrected | 296,851 | 5,389,524 | 2,343    | 3.77               | 3.85                 | 573                           | 2.20           |
| 11       | transect A        | 16-Jun        | corrected   | 296,902 | 5,389,568 | 2,330    | 3.47               | 3.47                 | 570                           | 1.98           |
| 12       | transect A        | 16-Jun        | uncorrected | 296,954 | 5,389,610 | 2,318    | 3.71               | 3.71                 | 572                           | 2.12           |
| 12.5     | transect A        | 16-Jun        | uncorrected | 296,954 | 5,389,610 | 2,318    | 3.71               | 3.71                 | 572                           | 2.12           |
| 13       | transect A        | 17-Jun        | corrected   | 297,005 | 5,389,651 | 2,309    | 5.77               | 5.77                 | 584                           | 3.37           |
| 14       | transect A        | 16-Jun        | corrected   | 297,067 | 5,389,705 | 2,306    | 3.21               | 3.21                 | 568                           | 1.82           |
| 16       | transect A        | 16-Jun        | corrected   | 297,158 | 5,389,792 | 2,306    | 3.40               | 3.40                 | 569                           | 1.94           |
| 17       | transect A        | 16-Jun        | corrected   | 297,208 | 5,389,840 | 2,302    | 3.37               | 3.37                 | 569                           | 1.92           |
| 18       | transect A        | 16-Jun        | corrected   | 297,254 | 5,389,891 | 2,305    | 3.35               | 3.35                 | 569                           | 1.91           |
| 19       | transect A        | 16-Jun        | corrected   | 297,282 | 5,389,940 | 2,306    | 6.17               | 6.17                 | 586                           | 3.61           |
| 1        | transect B        | 16-Jun        | corrected   | 297,343 | 5,389,725 | 2,364    | 5.23               | 5.23                 | 581                           | 3.04           |
| 2        | transect B        | 16-Jun        | corrected   | 297,317 | 5,389,706 | 2,365    | 4.77               | 4.77                 | 579                           | 2.76           |
| 3        | transect B        | 16-Jun        | corrected   | 297,270 | 5,389,668 | 2,362    | 4.85               | 4.85                 | 579                           | 2.81           |
| 4        | transect B        | 16-Jun        | corrected   | 297,223 | 5,389,631 | 2,355    | 3.53               | 3.53                 | 570                           | 2.01           |
| 5        | transect B        | 16-Jun        | uncorrected | 297,166 | 5,389,591 | 2,397    | 3.71               | 3.71                 | 572                           | 2.12           |
| 7        | transect B        | 17-Jun        | uncorrected | 297,068 | 5,389,519 | 2,356    | 3.51               | 3.51                 | 570                           | 2.00           |
| 9        | transect B        | 17-Jun        | uncorrected | 296,966 | 5,389,445 | 2,398    | 3.80               | 3.80                 | 572                           | 2.17           |
| 11       | transect B        | 17-Jun        | corrected   | 296,873 | 5,389,336 | 2,397    | 3.78               | 3.78                 | 572                           | 2.16           |
| 13       | transect B        | 17-Jun        | corrected   | 296,795 | 5,389,224 | 2,431    | 3.92               | 3.92                 | 573                           | 2.25           |
| 14       | transect B        | 17-Jun        | corrected   | 296,745 | 5,389,181 | 2,448    | 4.02               | 4.02                 | 574                           | 2.31           |
| 16       | transect B        | 17-Jun        | corrected   | 296,712 | 5,389,141 | 2,463    | 4.82               | 4.82                 | 579                           | 2.79           |

|          |                 |        |             |         |           |       |      |      |     |      |
|----------|-----------------|--------|-------------|---------|-----------|-------|------|------|-----|------|
| 17       | transect B      | 17-Jun | uncorrected | 296,698 | 5,389,124 | 2,469 | 3.03 | 3.03 | 566 | 1.72 |
| 18       | transect B      | 17-Jun | corrected   | 296,632 | 5,389,053 | 2,499 | 3.12 | 3.12 | 567 | 1.77 |
| 19       | transect B      | 17-Jun | corrected   | 296,600 | 5,389,030 | 2,502 | 3.48 | 3.48 | 570 | 1.98 |
| 20       | transect B      | 17-Jun | corrected   | 296,574 | 5,389,009 | 2,507 | 4.55 | 4.55 | 577 | 2.63 |
| 21       | transect B      | 17-Jun | corrected   | 296,544 | 5,388,986 | 2,519 | 3.93 | 3.93 | 573 | 2.25 |
| 22       | transect B      | 17-Jun | corrected   | 296,517 | 5,388,964 | 2,533 | 4.75 | 4.75 | 578 | 2.75 |
| 1        | transect C      | 17-Jun | uncorrected | 297,382 | 5,389,645 | 2,380 | 4.25 | 4.25 | 575 | 2.45 |
| 3        | transect C      | 17-Jun | uncorrected | 297,334 | 5,389,602 | 2,383 | 2.28 | 2.28 | 558 | 1.27 |
| 5        | transect C      | 17-Jun | uncorrected | 297,287 | 5,389,548 | 2,387 | 2.18 | 2.18 | 557 | 1.21 |
| 7        | transect C      | 17-Jun | uncorrected | 297,200 | 5,389,445 | 2,392 | 3.89 | 3.89 | 573 | 2.23 |
| 9        | transect C      | 17-Jun | uncorrected | 297,095 | 5,389,352 | 2,411 | 3.40 | 3.40 | 569 | 1.94 |
| 10       | transect C      | 17-Jun | uncorrected | 297,048 | 5,389,300 | 2,422 | 4.27 | 4.27 | 576 | 2.46 |
| 12       | transect C      | 17-Jun | uncorrected | 296,945 | 5,389,209 | 2,444 | 3.76 | 3.76 | 572 | 2.15 |
| 13       | transect C      | 17-Jun | uncorrected | 296,740 | 5,389,014 | 2,516 | 4.10 | 4.10 | 574 | 2.36 |
| 1        | transect D      | 17-Jun | uncorrected | 296,592 | 5,389,355 | 2,409 | 6.02 | 6.02 | 585 | 3.52 |
| 2        | transect D      | 17-Jun | uncorrected | 296,705 | 5,389,307 | 2,420 | 4.63 | 4.63 | 578 | 2.68 |
| 3        | transect D      | 17-Jun | uncorrected | 296,862 | 5,389,272 | 2,424 | 2.82 | 2.82 | 564 | 1.59 |
| 4        | transect D      | 17-Jun | uncorrected | 296,914 | 5,389,250 | 2,432 | 5.73 | 5.73 | 584 | 3.34 |
| 5        | transect D      | 17-Jun | uncorrected | 297,023 | 5,389,220 | 2,454 | 3.03 | 3.03 | 566 | 1.72 |
| 6        | transect D      | 17-Jun | uncorrected | 297,131 | 5,389,198 | 2,476 | 6.73 | 6.73 | 588 | 3.96 |
| 7        | transect D      | 17-Jun | uncorrected | 297,184 | 5,389,181 | 2,498 | 8.50 | 8.50 | 594 | 5.05 |
| 1        | annual transect | 25-Jun | corrected   | 296,783 | 5,389,673 | 2,299 | 3.72 | 3.97 | 574 | 2.28 |
| 2        | annual transect | 25-Jun | corrected   | 296,775 | 5,389,618 | 2,323 | 2.15 | 2.40 | 560 | 1.34 |
| 3        | annual transect | 25-Jun | corrected   | 296,766 | 5,389,564 | 2,338 | 3.32 | 3.57 | 571 | 2.04 |
| 4        | annual transect | 25-Jun | corrected   | 296,760 | 5,389,510 | 2,346 | 3.83 | 4.08 | 574 | 2.34 |
| 5        | annual transect | 25-Jun | corrected   | 296,753 | 5,389,456 | 2,363 | 3.20 | 3.45 | 570 | 1.97 |
| 6        | annual transect | 25-Jun | corrected   | 296,745 | 5,389,405 | 2,378 | 3.42 | 3.67 | 571 | 2.10 |
| 7        | annual transect | 25-Jun | corrected   | 296,739 | 5,389,354 | 2,394 | 3.98 | 4.23 | 575 | 2.43 |
| 8        | annual transect | 25-Jun | corrected   | 296,733 | 5,389,306 | 2,411 | 3.42 | 3.67 | 571 | 2.10 |
| 9        | annual transect | 25-Jun | corrected   | 296,723 | 5,389,255 | 2,427 | 4.80 | 5.05 | 580 | 2.93 |
| 10       | annual transect | 25-Jun | corrected   | 296,716 | 5,389,208 | 2,443 | 3.57 | 3.82 | 572 | 2.19 |
| 11       | annual transect | 25-Jun | corrected   | 296,703 | 5,389,107 | 2,479 | 2.45 | 2.70 | 563 | 1.52 |
| 12       | annual transect | 25-Jun | corrected   | 296,697 | 5,389,056 | 2,498 | 3.23 | 3.48 | 570 | 1.98 |
| 13       | annual transect | 25-Jun | corrected   | 296,692 | 5,389,005 | 2,511 | 2.05 | 2.30 | 559 | 1.28 |
| 14       | annual transect | 25-Jun | corrected   | 296,688 | 5,388,954 | 2,527 | 3.40 | 3.65 | 571 | 2.08 |
| 16       | annual transect | 25-Jun | corrected   | 296,678 | 5,388,854 | 2,565 | 5.40 | 5.65 | 583 | 3.30 |
| 17       | annual transect | 25-Jun | corrected   | 296,673 | 5,388,806 | 2,584 | 8.00 | 8.25 | 594 | 4.90 |
| bare ice | bare ice        | 25-Jun | corrected   | 296,530 | 5,389,176 | 2,459 | 0.00 | 0.00 | 0   | 0.00 |

---

|                |      |    |      |     |      |
|----------------|------|----|------|-----|------|
| <b>Count:</b>  | 80   | na | 80   | 80  | 80   |
| <b>Mean:</b>   | 2411 | na | 3.91 | 564 | 2.25 |
| <b>Median:</b> | 2404 | na | 3.74 | 572 | 2.14 |
| <b>StdDev:</b> | 70   | na | 1.34 | 65  | 0.80 |
| <b>Min:</b>    | 2299 | na | 0.00 | 0   | 0.00 |
| <b>Max:</b>    | 2584 | na | 8.50 | 594 | 5.05 |
| <b>Range:</b>  | 285  | na | 8.50 | 594 | 5.05 |

**Table S6:** 2010 snow depths

**Coordinates:** NAD83 UTM Zone 12N

| <b>2010</b> |                   |               |           |         |           |          |                    |                               |                |
|-------------|-------------------|---------------|-----------|---------|-----------|----------|--------------------|-------------------------------|----------------|
| Point ID    | Measurement Group | Date Measured | GPS       | Easting | Northing  | Elev (m) | Measured Depth (m) | Density (kg m <sup>-3</sup> ) | b <sub>w</sub> |
| A           | stake site        | 23-Jun        | corrected | 296,743 | 5,389,407 | 2,380    | 4.10               | 574                           | 2.36           |
| B           | stake site        | 23-Jun        | corrected | 296,990 | 5,389,585 | 2,324    | 4.00               | 574                           | 2.29           |
| C           | stake site        | 23-Jun        | corrected | 296,712 | 5,389,162 | 2,464    | 5.45               | 582                           | 3.17           |
| D           | stake site        | 23-Jun        | corrected | 296,686 | 5,388,896 | 2,549    | 6.40               | 587                           | 3.75           |
| E           | stake site        | 23-Jun        | corrected | 296,443 | 5,389,176 | 2,461    | 4.85               | 579                           | 2.81           |
| F           | stake site        | 23-Jun        | corrected | 297,158 | 5,389,562 | 2,352    | 4.60               | 578                           | 2.66           |
| G           | stake site        | 23-Jun        | corrected | 297,003 | 5,389,133 | 2,486    | 4.70               | 578                           | 2.72           |
| 1           | annual transect   | 23-Jun        | corrected | 296,690 | 5,388,950 | 2,529    | 5.80               | 584                           | 3.39           |
| 2           | annual transect   | 23-Jun        | corrected | 296,683 | 5,388,900 | 2,547    | 6.50               | 587                           | 3.82           |
| 3           | annual transect   | 23-Jun        | corrected | 296,677 | 5,388,878 | 2,555    | 6.50               | 587                           | 3.82           |
| 4           | annual transect   | 23-Jun        | corrected | 296,676 | 5,388,854 | 2,564    | 6.75               | 588                           | 3.97           |
| 5           | annual transect   | 23-Jun        | corrected | 296,691 | 5,389,004 | 2,515    | 3.40               | 569                           | 1.94           |
| 6           | annual transect   | 23-Jun        | corrected | 296,697 | 5,389,056 | 2,500    | 3.45               | 570                           | 1.97           |
| 7           | annual transect   | 23-Jun        | corrected | 296,702 | 5,389,107 | 2,481    | 3.85               | 573                           | 2.20           |
| 9           | annual transect   | 23-Jun        | corrected | 296,717 | 5,389,208 | 2,443    | 4.75               | 578                           | 2.75           |
| 10          | annual transect   | 23-Jun        | corrected | 296,723 | 5,389,257 | 2,427    | 5.40               | 582                           | 3.14           |
| 11          | annual transect   | 23-Jun        | corrected | 296,733 | 5,389,307 | 2,410    | 3.90               | 573                           | 2.23           |
| 12          | annual transect   | 23-Jun        | corrected | 296,739 | 5,389,355 | 2,396    | 4.50               | 577                           | 2.60           |
| 13          | annual transect   | 23-Jun        | corrected | 296,745 | 5,389,405 | 2,379    | 4.25               | 575                           | 2.45           |
| 14          | annual transect   | 23-Jun        | corrected | 296,753 | 5,389,459 | 2,364    | 4.05               | 574                           | 2.33           |
| 15          | annual transect   | 23-Jun        | corrected | 296,759 | 5,389,511 | 2,349    | 5.10               | 580                           | 2.96           |
| 16          | annual transect   | 23-Jun        | corrected | 296,767 | 5,389,565 | 2,338    | 3.90               | 573                           | 2.23           |
| 17          | annual transect   | 23-Jun        | corrected | 296,776 | 5,389,619 | 2,322    | 3.60               | 571                           | 2.06           |
| 18          | annual transect   | 23-Jun        | corrected | 296,783 | 5,389,670 | 2,304    | 4.35               | 576                           | 2.51           |
| 19          | annual transect   | 23-Jun        | corrected | 296,667 | 5,388,937 | 2,535    | 6.00               | 585                           | 3.51           |
| 20          | annual transect   | 23-Jun        | corrected | 296,741 | 5,389,183 | 2,445    | 4.80               | 579                           | 2.78           |
| 21          | annual transect   | 23-Jun        | corrected | 296,687 | 5,388,955 | 2,523    | 5.45               | 582                           | 3.17           |
| 22          | annual transect   | 23-Jun        | corrected | 296,669 | 5,388,936 | 2,527    | 6.20               | 586                           | 3.63           |
| 1           | transect 2        | 23-Jun        | corrected | 296,599 | 5,389,345 | 2,408    | 4.47               | 577                           | 2.58           |
| 2           | transect 2        | 23-Jun        | corrected | 296,653 | 5,389,331 | 2,410    | 5.60               | 583                           | 3.26           |
| 3           | transect 2        | 23-Jun        | corrected | 296,705 | 5,389,316 | 2,413    | 4.15               | 575                           | 2.39           |
| 4           | transect 2        | 23-Jun        | corrected | 296,831 | 5,389,287 | 2,418    | 4.03               | 574                           | 2.31           |
| 5           | transect 2        | 23-Jun        | corrected | 296,918 | 5,389,253 | 2,429    | 5.57               | 583                           | 3.25           |
| 7           | transect 2        | 23-Jun        | corrected | 297,134 | 5,389,195 | 2,479    | 4.40               | 576                           | 2.54           |
| 8           | transect 2        | 23-Jun        | corrected | 297,185 | 5,389,183 | 2,501    | 6.27               | 586                           | 3.67           |
| 1           | transect 2a       | 23-Jun        | corrected | 297,279 | 5,389,939 | 2,299    | 6.25               | 586                           | 3.66           |
| 2           | transect 2a       | 23-Jun        | corrected | 297,255 | 5,389,889 | 2,294    | 4.25               | 575                           | 2.45           |
| 3           | transect 2a       | 23-Jun        | corrected | 297,207 | 5,389,839 | 2,301    | 4.60               | 578                           | 2.66           |
| 4           | transect 2a       | 23-Jun        | corrected | 297,157 | 5,389,789 | 2,305    | 4.90               | 579                           | 2.84           |
| 5           | transect 2a       | 23-Jun        | corrected | 297,106 | 5,389,739 | 2,304    | 3.70               | 572                           | 2.11           |

|          |             |        |           |         |           |       |      |     |      |
|----------|-------------|--------|-----------|---------|-----------|-------|------|-----|------|
| 6        | transect 2a | 23-Jun | corrected | 297,058 | 5,389,696 | 2,306 | 3.60 | 571 | 2.06 |
| 7        | transect 2a | 23-Jun | corrected | 296,954 | 5,389,610 | 2,315 | 4.30 | 576 | 2.48 |
| 8        | transect 2a | 23-Jun | corrected | 296,848 | 5,389,525 | 2,340 | 4.60 | 578 | 2.66 |
| 9        | transect 2a | 23-Jun | corrected | 296,745 | 5,389,437 | 2,362 | 3.10 | 567 | 1.76 |
| 10       | transect 2a | 23-Jun | corrected | 296,692 | 5,389,397 | 2,373 | 3.30 | 568 | 1.88 |
| 11       | transect 2a | 23-Jun | corrected | 296,475 | 5,389,231 | 2,427 | 1.67 | 550 | 0.92 |
| 12       | transect 2a | 23-Jun | corrected | 296,450 | 5,389,208 | 2,434 | 4.40 | 576 | 2.54 |
| 13       | transect 2a | 23-Jun | corrected | 296,423 | 5,389,186 | 2,439 | 4.85 | 579 | 2.81 |
| 14       | transect 2a | 23-Jun | corrected | 296,395 | 5,389,167 | 2,446 | 5.15 | 581 | 2.99 |
| 1        | transect 3  | 23-Jun | corrected | 297,379 | 5,389,640 | 2,377 | 5.62 | 583 | 3.28 |
| 2        | transect 3  | 23-Jun | corrected | 297,360 | 5,389,619 | 2,374 | 5.55 | 583 | 3.23 |
| 4        | transect 3  | 23-Jun | corrected | 297,312 | 5,389,591 | 2,382 | 5.35 | 582 | 3.11 |
| 5        | transect 3  | 23-Jun | corrected | 297,288 | 5,389,547 | 2,388 | 4.60 | 578 | 2.66 |
| 6        | transect 3  | 23-Jun | corrected | 297,193 | 5,389,445 | 2,387 | 4.08 | 574 | 2.34 |
| 7        | transect 3  | 23-Jun | corrected | 297,098 | 5,389,343 | 2,409 | 4.43 | 577 | 2.55 |
| 8        | transect 3  | 23-Jun | corrected | 297,001 | 5,389,243 | 2,434 | 3.53 | 570 | 2.01 |
| 9        | transect 3  | 23-Jun | corrected | 296,901 | 5,389,144 | 2,460 | 4.37 | 576 | 2.52 |
| 10       | transect 3  | 23-Jun | corrected | 296,800 | 5,389,051 | 2,492 | 5.30 | 581 | 3.08 |
| 13       | transect 3  | 23-Jun | corrected | 296,644 | 5,388,913 | 2,536 | 5.33 | 582 | 3.10 |
| 14       | transect 3  | 23-Jun | corrected | 296,594 | 5,388,938 | N/O   | 7.00 | 589 | 4.12 |
| 2        | transect 3a | 23-Jun | corrected | 296,966 | 5,389,436 | 2,362 | 4.60 | 578 | 2.66 |
| 3        | transect 3a | 23-Jun | corrected | 297,174 | 5,389,592 | 2,348 | 4.40 | 576 | 2.54 |
| 1        | transect 4  | 23-Jun | corrected | 296,524 | 5,388,962 | 2,529 | 7.00 | 589 | 4.12 |
| 2        | transect 4  | 23-Jun | corrected | 296,571 | 5,389,011 | 2,504 | 5.42 | 582 | 3.15 |
| 3        | transect 4  | 23-Jun | corrected | 296,597 | 5,389,035 | 2,494 | 4.92 | 579 | 2.85 |
| 4        | transect 4  | 23-Jun | corrected | 296,646 | 5,389,085 | 2,491 | 2.80 | 564 | 1.58 |
| 6        | transect 4  | 23-Jun | corrected | 296,876 | 5,389,338 | 2,398 | 4.52 | 577 | 2.61 |
| 8        | transect 4  | 23-Jun | corrected | 297,069 | 5,389,519 | 2,353 | 4.13 | 575 | 2.37 |
| 10       | transect 4  | 23-Jun | corrected | 297,271 | 5,389,664 | 2,371 | 4.63 | 578 | 2.68 |
| 12       | transect 4  | 23-Jun | corrected | 297,344 | 5,389,725 | 2,375 | 5.27 | 581 | 3.06 |
| bare ice | bare ice    | 23-Jun | corrected | 296,530 | 5,389,176 | 2,459 | 0.00 | 0   | 0.00 |

---

|                |      |      |     |      |
|----------------|------|------|-----|------|
| <b>Count:</b>  | 70   | 71   | 71  | 71   |
| <b>Mean:</b>   | 2420 | 4.68 | 570 | 2.71 |
| <b>Median:</b> | 2412 | 4.60 | 578 | 2.66 |
| <b>StdDev:</b> | 76   | 1.16 | 69  | 0.70 |
| <b>Min:</b>    | 2294 | 0.00 | 0   | 0.00 |
| <b>Max:</b>    | 2564 | 7.00 | 589 | 4.12 |
| <b>Range:</b>  | 271  | 7.00 | 589 | 4.12 |

**Table S7:** 2011 snow depths

**Coordinates:** NAD83 UTM Zone 12N

| <b>2011</b>    |                   |               |           |          |           |          |                    |                               |                |
|----------------|-------------------|---------------|-----------|----------|-----------|----------|--------------------|-------------------------------|----------------|
| Point ID       | Measurement Group | Date Measured | GPS       | Eastings | Northing  | Elev (m) | Measured Depth (m) | Density (kg m <sup>-3</sup> ) | b <sub>w</sub> |
| A              | stake site        | 24-Jun        | corrected | 296,741  | 5,389,397 | 2,380    | 6.60               | 588                           | 3.88           |
| B              | stake site        | 24-Jun        | corrected | 296,992  | 5,389,597 | 2,324    | 6.56               | 587                           | 3.86           |
| C              | stake site        | 24-Jun        | corrected | 296,714  | 5,389,170 | 2,464    | 7.65               | 592                           | 4.53           |
| D              | stake site        | 24-Jun        | corrected | 296,687  | 5,388,900 | 2,549    | 8.55               | 595                           | 5.08           |
| E              | stake site        | 24-Jun        | corrected | 296,440  | 5,389,172 | 2,461    | 5.97               | 585                           | 3.49           |
| F              | stake site        | 24-Jun        | corrected | 297,155  | 5,389,566 | 2,352    | 6.07               | 585                           | 3.55           |
| G              | stake site        | 24-Jun        | corrected | 296,997  | 5,389,120 | 2,486    | 7.13               | 590                           | 4.21           |
| 1              | annual transect   | 24-Jun        | corrected | 296,644  | 5,388,761 | 2,620    | 8.50               | 594                           | 5.05           |
| 2              | annual transect   | 24-Jun        | corrected | 296,660  | 5,388,779 | 2,605    | 8.50               | 594                           | 5.05           |
| 3              | annual transect   | 24-Jun        | corrected | 296,670  | 5,388,801 | 2,592    | 7.32               | 590                           | 4.32           |
| 4              | annual transect   | 24-Jun        | corrected | 296,675  | 5,388,853 | 2,571    | 7.87               | 592                           | 4.66           |
| 5              | annual transect   | 24-Jun        | corrected | 296,681  | 5,388,903 | 2,550    | 7.42               | 591                           | 4.38           |
| 6              | annual transect   | 24-Jun        | corrected | 296,694  | 5,388,958 | 2,531    | 8.08               | 593                           | 4.79           |
| 7              | annual transect   | 24-Jun        | corrected | 296,691  | 5,389,007 | 2,519    | 7.13               | 590                           | 4.20           |
| 8              | annual transect   | 24-Jun        | corrected | 296,696  | 5,389,057 | 2,503    | 6.95               | 589                           | 4.09           |
| 9              | annual transect   | 24-Jun        | corrected | 296,705  | 5,389,110 | 2,483    | 6.33               | 586                           | 3.71           |
| 10             | annual transect   | 24-Jun        | corrected | 296,712  | 5,389,157 | 2,463    | 5.88               | 584                           | 3.44           |
| 11             | annual transect   | 24-Jun        | corrected | 296,725  | 5,389,262 | N/O      | 8.05               | 593                           | 4.77           |
| 12             | annual transect   | 24-Jun        | corrected | 296,719  | 5,389,209 | N/O      | 8.58               | 595                           | 5.10           |
| 13             | annual transect   | 24-Jun        | corrected | 296,732  | 5,389,314 | 2,414    | 6.03               | 585                           | 3.53           |
| 14             | annual transect   | 24-Jun        | corrected | 296,741  | 5,389,361 | 2,395    | 6.58               | 587                           | 3.87           |
| 15             | annual transect   | 24-Jun        | corrected | 296,746  | 5,389,417 | 2,382    | 6.48               | 587                           | 3.80           |
| 16             | annual transect   | 24-Jun        | corrected | 296,752  | 5,389,461 | 2,366    | 5.90               | 584                           | 3.45           |
| 17             | annual transect   | 24-Jun        | corrected | 296,759  | 5,389,513 | 2,351    | 6.65               | 588                           | 3.91           |
| 18             | annual transect   | 24-Jun        | corrected | 296,767  | 5,389,570 | 2,336    | 5.83               | 584                           | 3.41           |
| 19             | annual transect   | 24-Jun        | corrected | 296,784  | 5,389,627 | 2,325    | 6.18               | 586                           | 3.62           |
| 20             | annual transect   | 24-Jun        | corrected | 296,780  | 5,389,675 | 2,301    | 7.23               | 590                           | 4.27           |
| <b>Count:</b>  |                   |               |           |          |           | 25       | 27                 | 27                            | 27             |
| <b>Mean:</b>   |                   |               |           |          |           | 2453     | 7.04               | 589                           | 4.15           |
| <b>Median:</b> |                   |               |           |          |           | 2463     | 6.95               | 589                           | 4.09           |
| <b>StdDev:</b> |                   |               |           |          |           | 98       | 0.92               | 4                             | 0.57           |
| <b>Min:</b>    |                   |               |           |          |           | 2301     | 5.83               | 584                           | 3.41           |
| <b>Max:</b>    |                   |               |           |          |           | 2620     | 8.58               | 595                           | 5.10           |
| <b>Range:</b>  |                   |               |           |          |           | 319      | 2.75               | 11                            | 1.70           |

**Table S8:** 2012 snow depths

**Coordinates:** NAD83 UTM Zone 12N

| <b>2012</b>    |                   |               |             |         |           |          |                    |                      |                               |                |
|----------------|-------------------|---------------|-------------|---------|-----------|----------|--------------------|----------------------|-------------------------------|----------------|
| Point ID       | Measurement Group | Date Measured | GPS         | Easting | Northing  | Elev (m) | Measured Depth (m) | Depth on June 28 (m) | Density (kg m <sup>-3</sup> ) | b <sub>w</sub> |
| A              | stake site        | 28-Jun        | uncorrected | 296,737 | 5,389,404 | 2,377    | 5.15               | 5.15                 | 581                           | 2.99           |
| B              | stake site        | 12-Jul        | uncorrected | 296,987 | 5,389,587 | 2,323    | 4.60               | 5.10                 | 580                           | 2.96           |
| C              | stake site        | 28-Jun        | uncorrected | 296,709 | 5,389,173 | 2,454    | 6.40               | 6.40                 | 587                           | 3.75           |
| D              | stake site        | 28-Jun        | uncorrected | 296,679 | 5,388,904 | 2,547    | 9.00               | 9.00                 | 596                           | 5.36           |
| E              | stake site        | 28-Jun        | uncorrected | 296,440 | 5,389,175 | 2,450    | 4.25               | 4.25                 | 575                           | 2.45           |
| F              | stake site        | 28-Jun        | uncorrected | 297,156 | 5,389,559 | 2,358    | 6.15               | 6.15                 | 586                           | 3.60           |
| G              | stake site        | 12-Jul        | uncorrected | 296,995 | 5,389,129 | 2,480    | 5.40               | 6.65                 | 588                           | 3.91           |
| 6              | annual transect   | 12-Jul        | corrected   | 296,694 | 5,388,957 | 2,533    | 7.85               | 9.09                 | 596                           | 5.42           |
| 9              | annual transect   | 12-Jul        | corrected   | 296,705 | 5,389,110 | 2,483    | 3.00               | 4.24                 | 575                           | 2.44           |
| 10             | annual transect   | 12-Jul        | corrected   | 296,712 | 5,389,157 | 2,465    | 5.45               | 6.69                 | 588                           | 3.93           |
| 11             | annual transect   | 12-Jul        | corrected   | 296,719 | 5,389,209 | 2,447    | 5.05               | 6.29                 | 586                           | 3.69           |
| 12             | annual transect   | 12-Jul        | corrected   | 296,726 | 5,389,314 | 2,413    | 4.00               | 5.24                 | 581                           | 3.05           |
| 13             | annual transect   | 12-Jul        | corrected   | 296,741 | 5,389,361 | 2,396    | 1.95               | 3.19                 | 568                           | 1.81           |
| 14             | annual transect   | 12-Jul        | corrected   | 296,746 | 5,389,416 | 2,378    | 2.00               | 3.24                 | 568                           | 1.84           |
| 15             | annual transect   | 12-Jul        | corrected   | 296,750 | 5,389,463 | 2,364    | 3.65               | 4.89                 | 579                           | 2.83           |
| 16             | annual transect   | 12-Jul        | corrected   | 296,759 | 5,389,513 | 2,350    | 4.25               | 5.49                 | 582                           | 3.20           |
| 17             | annual transect   | 12-Jul        | corrected   | 296,767 | 5,389,570 | 2,338    | 4.10               | 5.34                 | 582                           | 3.11           |
| 18             | annual transect   | 12-Jul        | corrected   | 296,784 | 5,389,627 | 2,321    | 2.85               | 4.09                 | 574                           | 2.35           |
| 19             | annual transect   | 12-Jul        | corrected   | 296,780 | 5,389,675 | 2,303    | 4.00               | 5.24                 | 581                           | 3.05           |
| <b>Count:</b>  |                   |               |             |         |           | 19       | na                 | 19                   | 19                            | 19             |
| <b>Mean:</b>   |                   |               |             |         |           | 2409     | na                 | 5.56                 | 582                           | 3.25           |
| <b>Median:</b> |                   |               |             |         |           | 2396     | na                 | 5.24                 | 581                           | 3.05           |
| <b>StdDev:</b> |                   |               |             |         |           | 73       | na                 | 1.60                 | 8                             | 0.98           |
| <b>Min:</b>    |                   |               |             |         |           | 2303     | na                 | 3.19                 | 568                           | 1.81           |
| <b>Max:</b>    |                   |               |             |         |           | 2547     | na                 | 9.09                 | 596                           | 5.42           |
| <b>Range:</b>  |                   |               |             |         |           | 244      | na                 | 5.90                 | 29                            | 3.61           |



**Table S9:** 2013 snow depths

**Coordinates:** NAD83 UTM Zone 12N

| <b>2013</b>     |                          |                      |            |                |                 |                 |                           |                                    |                      |
|-----------------|--------------------------|----------------------|------------|----------------|-----------------|-----------------|---------------------------|------------------------------------|----------------------|
| <b>Point ID</b> | <b>Measurement Group</b> | <b>Date Measured</b> | <b>GPS</b> | <b>Easting</b> | <b>Northing</b> | <b>Elev (m)</b> | <b>Measured Depth (m)</b> | <b>Density (kg m<sup>-3</sup>)</b> | <b>b<sub>w</sub></b> |
| A               | stake site               | 11-Jun               | corrected  | 296,735        | 5,389,407       | 2,382           | 5.05                      | 580                                | 2.93                 |
| B               | stake site               | 11-Jun               | corrected  | 296,989        | 5,389,588       | 2,328           | 5.15                      | 581                                | 2.99                 |
| C               | stake site               | 11-Jun               | corrected  | 296,711        | 5,389,178       | 2,460           | 5.05                      | 580                                | 2.93                 |
| D               | stake site               | 11-Jun               | corrected  | 296,683        | 5,388,910       | 2,551           | 7.25                      | 590                                | 4.28                 |
| E               | stake site               | 11-Jun               | corrected  | 296,439        | 5,389,177       | 2,458           | 4.50                      | 577                                | 2.60                 |
| F               | stake site               | 11-Jun               | corrected  | 297,152        | 5,389,562       | 2,348           | 5.30                      | 581                                | 3.08                 |
| G               | stake site               | 11-Jun               | corrected  | 296,996        | 5,389,131       | 2,486           | 5.05                      | 580                                | 2.93                 |
| 5               | annual transect          | 11-Jun               | corrected  | 296,681        | 5,388,914       | 2,555           | 7.23                      | 590                                | 4.27                 |
| 6               | annual transect          | 11-Jun               | corrected  | 296,694        | 5,388,958       | 2,536           | 5.75                      | 584                                | 3.36                 |
| 7               | annual transect          | 11-Jun               | corrected  | 296,691        | 5,389,007       | 2,521           | 4.30                      | 576                                | 2.48                 |
| 8               | annual transect          | 11-Jun               | corrected  | 296,696        | 5,389,057       | 2,505           | 3.85                      | 573                                | 2.20                 |
| 9               | annual transect          | 11-Jun               | corrected  | 296,705        | 5,389,110       | 2,485           | 4.13                      | 575                                | 2.38                 |
| 10              | annual transect          | 11-Jun               | corrected  | 296,711        | 5,389,178       | 2,460           | 5.03                      | 580                                | 2.92                 |
| 11              | annual transect          | 11-Jun               | corrected  | 296,718        | 5,389,209       | 2,449           | 5.27                      | 581                                | 3.06                 |
| 12              | annual transect          | 11-Jun               | corrected  | 296,726        | 5,389,313       | 2,413           | 4.42                      | 576                                | 2.55                 |
| 13              | annual transect          | 11-Jun               | corrected  | 296,741        | 5,389,361       | 2,397           | 5.07                      | 580                                | 2.94                 |
| 14              | annual transect          | 11-Jun               | corrected  | 296,752        | 5,389,461       | 2,365           | 4.55                      | 577                                | 2.63                 |
| 15              | annual transect          | 11-Jun               | corrected  | 296,759        | 5,389,514       | 2,350           | 4.75                      | 578                                | 2.75                 |
| 16              | annual transect          | 11-Jun               | corrected  | 296,768        | 5,389,571       | 2,338           | 4.43                      | 577                                | 2.56                 |
| 17              | annual transect          | 11-Jun               | corrected  | 296,784        | 5,389,627       | 2,320           | 4.27                      | 576                                | 2.46                 |
| 18              | annual transect          | 11-Jun               | corrected  | 296,780        | 5,389,676       | 2,303           | 4.88                      | 579                                | 2.83                 |
| <b>Count:</b>   |                          |                      |            |                |                 | 21              | 21                        | 21                                 | 21                   |
| <b>Mean:</b>    |                          |                      |            |                |                 | 2429            | 5.01                      | 580                                | 2.91                 |
| <b>Median:</b>  |                          |                      |            |                |                 | 2449            | 5.03                      | 580                                | 2.92                 |
| <b>StdDev:</b>  |                          |                      |            |                |                 | 81              | 0.87                      | 4                                  | 0.53                 |
| <b>Min:</b>     |                          |                      |            |                |                 | 2303            | 3.85                      | 573                                | 2.20                 |
| <b>Max:</b>     |                          |                      |            |                |                 | 2555            | 7.25                      | 590                                | 4.28                 |
| <b>Range:</b>   |                          |                      |            |                |                 | 252             | 3.40                      | 17                                 | 2.07                 |

**Table S10:** 2014 snow depths

**Coordinates:** NAD83 UTM Zone 12N

| 2014     |                   |               |             |         |           |                |                    |                               |                |      |
|----------|-------------------|---------------|-------------|---------|-----------|----------------|--------------------|-------------------------------|----------------|------|
| Point ID | Measurement Group | Date Measured | GPS         | Easting | Northing  | Elev (m)       | Measured Depth (m) | Density (kg m <sup>-3</sup> ) | b <sub>w</sub> |      |
| A        | stake site        | 11-Jun        | uncorrected | 296,735 | 5,389,407 | 2,382          | 5.45               | 549                           | 2.99           |      |
| B        | stake site        | 11-Jun        | uncorrected | 296,989 | 5,389,588 | 2,328          | 5.62               | 536                           | 3.01           |      |
| C        | stake site        | 11-Jun        | uncorrected | 296,711 | 5,389,178 | 2,460          | 5.19               | 507                           | 2.63           |      |
| D        | stake site        | 11-Jun        | uncorrected | 296,683 | 5,388,910 | 2,551          | 7.95               | 551                           | 4.38           |      |
| E        | stake site        | 11-Jun        | uncorrected | 296,439 | 5,389,177 | 2,458          | 3.80               | 536                           | 2.04           |      |
| F        | stake site        | 11-Jun        | uncorrected | 297,152 | 5,389,562 | 2,348          | 5.27               | 536                           | 2.82           |      |
| G        | stake site        | 11-Jun        | uncorrected | 296,996 | 5,389,131 | 2,486          | 5.28               | 536                           | 2.83           |      |
|          |                   |               |             |         |           | <b>Count:</b>  | 7                  | 7                             | 7              | 7    |
|          |                   |               |             |         |           | <b>Mean:</b>   | 2430               | 5.51                          | 536            | 2.96 |
|          |                   |               |             |         |           | <b>Median:</b> | 2458               | 5.28                          | 536            | 2.83 |
|          |                   |               |             |         |           | <b>StdDev:</b> | 81                 | 1.23                          | 14             | 0.71 |
|          |                   |               |             |         |           | <b>Min:</b>    | 2328               | 3.80                          | 507            | 2.04 |
|          |                   |               |             |         |           | <b>Max:</b>    | 2551               | 7.95                          | 551            | 4.38 |
|          |                   |               |             |         |           | <b>Range:</b>  | 223                | 4.15                          | 44             | 2.34 |

**Table S11:** 2015 snow depths

**Coordinates:** NAD83 UTM Zone 12

| 2015     |                   |               |             |         |           |                |                    |                     |                               |                |      |
|----------|-------------------|---------------|-------------|---------|-----------|----------------|--------------------|---------------------|-------------------------------|----------------|------|
| Point ID | Measurement Group | Date Measured | GPS         | Easting | Northing  | Elev (m)       | Measured Depth (m) | Depth on May 25 (m) | Density (kg m <sup>-3</sup> ) | b <sub>w</sub> |      |
| A        | stake site        | 25-May        | uncorrected | 296,741 | 5,389,395 | 2,387          | 5.00               | 5.00                | 491                           | 2.46           |      |
| B        | stake site        | 25-May        | uncorrected | 296,996 | 5,389,582 | 2,338          | 4.62               | 4.62                | 506                           | 2.34           |      |
| C        | stake site        | 25-May        | uncorrected | 296,713 | 5,389,175 | 2,460          | 5.60               | 5.60                | 521                           | 2.92           |      |
| D        | stake site        | 25-May        | uncorrected | 296,689 | 5,388,900 | 2,552          | 6.43               | 6.43                | 506                           | 3.25           |      |
| E        | stake site        | 25-May        | uncorrected | 296,443 | 5,389,175 | 2,454          | 3.93               | 3.93                | 506                           | 1.99           |      |
| F        | stake site        | 25-May        | uncorrected | 297,156 | 5,389,565 | 2,363          | 4.68               | 4.68                | 506                           | 2.37           |      |
| G        | stake site        | 25-May        | uncorrected | 296,994 | 5,389,123 | 2,488          | 5.08               | 5.08                | 506                           | 2.57           |      |
| Z        | stake site        | 15-Jun        | uncorrected | 296,825 | 5,388,829 | 2,567          | 6.67               | 8.34                | 506                           | 4.22           |      |
|          |                   |               |             |         |           | <b>Count:</b>  | 8                  | 8                   | 8                             | 8              |      |
|          |                   |               |             |         |           | <b>Mean:</b>   | 2451               | 5.25                | 5.46                          | 506            | 2.76 |
|          |                   |               |             |         |           | <b>Median:</b> | 2457               | 5.04                | 5.04                          | 506            | 2.51 |
|          |                   |               |             |         |           | <b>StdDev:</b> | 84                 | 0.93                | 1.38                          | 8              | 0.70 |
|          |                   |               |             |         |           | <b>Min:</b>    | 2338               | 3.93                | 3.93                          | 491            | 1.99 |
|          |                   |               |             |         |           | <b>Max:</b>    | 2567               | 6.67                | 8.34                          | 521            | 4.22 |
|          |                   |               |             |         |           | <b>Range:</b>  | 229                | 2.74                | 4.41                          | 30             | 2.23 |



**Table S12:** 2005 ablation stake sites  
**Coordinates:** NAD83 UTM Zone 12N

| 2005           |          |                          |                          |                         |                                 |                               |                                         |                              |                                    |                |                |
|----------------|----------|--------------------------|--------------------------|-------------------------|---------------------------------|-------------------------------|-----------------------------------------|------------------------------|------------------------------------|----------------|----------------|
| ID             | Old ID # | Easting                  | Northing                 | Elev (m)                | Install Date                    | Final Visit Date              | Measured Snow Depth on Install Date (m) | Snow Depth on June 24 (m)    | Snow Density (kg m <sup>-3</sup> ) | GPS            |                |
| A              | 1        | 296,747                  | 5,389,408                | 2,362                   | 25-Jun                          | 9-Sep                         | 3.59                                    | 3.59                         | 571                                | uncorrected    |                |
| C              | 2        | 296,712                  | 5,389,168                | 2,447                   | 25-Jun                          | 9-Sep                         | 4.20                                    | 4.20                         | 575                                | uncorrected    |                |
| D              | 3        | 296,682                  | 5,388,899                | 2,525                   | 26-Jun                          | 9-Sep                         | 4.55                                    | 4.55                         | 577                                | uncorrected    |                |
| h              | 4        | 296,853                  | 5,389,132                | 2,453                   | 13-Jul                          | 9-Sep                         | 2.45                                    | N/A                          | N/A                                | uncorrected    |                |
| G              | 5        | 297,004                  | 5,389,140                | 2,467                   | 14-Jul                          | 9-Sep                         | 2.35                                    | N/A                          | N/A                                | uncorrected    |                |
| ID             | Old ID # | $\Delta$ Snow Height (m) | $\Delta$ Firn Height (m) | $\Delta$ Ice Height (m) | Total Meas. $\Delta$ Height (m) | $\Delta$ Mass – Snow (m w.e.) | $\Delta$ Mass – Firn (m w.e.)           | $\Delta$ Mass – Ice (m w.e.) | $b_s$ (m w.e.)                     | $b_w$ (m w.e.) | $b_a$ (m w.e.) |
| A              | 1        | -3.59                    | 0.00                     | -1.66                   | -5.25                           | -2.05                         | 0.00                                    | -1.45                        | -3.50                              | 2.05           | -1.45          |
| C              | 2        | -4.20                    | 0.00                     | -1.01                   | -5.21                           | -2.42                         | 0.00                                    | -0.88                        | -3.30                              | 2.42           | -0.88          |
| D              | 3        | -4.55                    | -0.51                    | 0.00                    | -5.06                           | -2.63                         | -0.37                                   | 0.00                         | -2.99                              | 2.63           | -0.37          |
| h              | 4        | -2.45                    | 0.00                     | -1.00                   | -3.45                           | N/O                           | 0.00                                    | -0.87                        | N/O                                | N/O            | -0.87          |
| G              | 5        | -2.35                    | 0.00                     | -1.01                   | -3.36                           | N/O                           | 0.00                                    | -0.88                        | N/O                                | N/O            | -0.88          |
| <b>Count:</b>  |          | 3                        | 3                        | 5                       | 3                               | 3                             | 3                                       | 5                            | 3                                  | 3              | 5              |
| <b>Mean:</b>   |          | -4.11                    | -0.17                    | -0.94                   | -5.17                           | -2.36                         | -0.12                                   | -0.82                        | -3.26                              | 2.36           | -0.89          |
| <b>Median:</b> |          | -4.20                    | 0.00                     | -1.01                   | -5.21                           | -2.42                         | 0.00                                    | -0.88                        | -3.30                              | 2.42           | -0.88          |
| <b>StdDev:</b> |          | 0.49                     | 0.29                     | 0.59                    | 0.10                            | 0.29                          | 0.21                                    | 0.52                         | 0.25                               | 0.29           | 0.38           |
| <b>Min:</b>    |          | -4.55                    | -0.51                    | -1.66                   | -5.25                           | -2.63                         | -0.37                                   | -1.45                        | -3.50                              | 2.05           | -1.45          |
| <b>Max:</b>    |          | -3.59                    | 0.00                     | 0.00                    | -5.06                           | -2.05                         | 0.00                                    | 0.00                         | -2.99                              | 2.63           | -0.37          |
| <b>Range:</b>  |          | 0.96                     | 0.51                     | 1.66                    | 0.19                            | 0.58                          | 0.37                                    | 1.45                         | 0.51                               | 0.58           | 1.08           |

**Table S13:** 2006 ablation stake sites  
**Coordinates:** NAD83 UTM Zone 12N

| 2006 |          |                   |                   |                  |                          |                        |                                         |                             |                                    |                               |                               |
|------|----------|-------------------|-------------------|------------------|--------------------------|------------------------|-----------------------------------------|-----------------------------|------------------------------------|-------------------------------|-------------------------------|
| ID   | Old ID # | Easting           | Northing          | Elev (m)         | Install Date             | Final Visit Date       | Measured Snow Depth on Install Date (m) | ±Snow Depth on June 8th (m) | Snow Density (kg m <sup>-3</sup> ) | GPS                           |                               |
| A    | 1        | 296,747           | 5,389,410         | 2,360            | 28-Jun                   | 28-Sep                 | 4.07                                    | 4.64                        | 578                                | corrected                     |                               |
| C    | 2        | 296,712           | 5,389,168         | 2,447            | 27-Jun                   | 28-Sep                 | 4.43                                    | 4.97                        | 580                                | uncorrected                   |                               |
| D    | 3        | 296,682           | 5,388,899         | 2,525            | 29-Jun                   | N/O                    | 5.55                                    | 6.15                        | 586                                | uncorrected                   |                               |
| h    | 4        | 296,853           | 5,389,132         | 2,453            | 27-Jun                   | 28-Sep                 | 4.83                                    | 5.43                        | 582                                | uncorrected                   |                               |
| G    | 5        | 297,004           | 5,389,140         | 2,467            | 27-Jun                   | 28-Sep                 | 3.88                                    | 4.48                        | 577                                | uncorrected                   |                               |
| i    | 6        | 297,262           | 5,389,277         | 2,465            | 27-Jun                   | N/O                    | 7.00                                    | 7.54                        | 591                                | corrected                     |                               |
| j    | 7        | 297,271           | 5,389,447         | 2,407            | 27-Jun                   | N/O                    | 4.10                                    | 4.64                        | 578                                | corrected                     |                               |
| k    | 8        | 297,098           | 5,389,343         | 2,409            | 28-Jun                   | N/O                    | 3.45                                    | 4.99                        | 580                                | corrected                     |                               |
| l    | 9        | 297,024           | 5,389,454         | 2,364            | 28-Jun                   | 28-Sep                 | 3.50                                    | 4.07                        | 574                                | corrected                     |                               |
| m    | 10       | 297,235           | 5,389,643         | 2,359            | 27-Jun                   | 28-Sep                 | 3.45                                    | 3.99                        | 574                                | corrected                     |                               |
| n    | 11       | 297,255           | 5,389,891         | 2,309            | 27-Jun                   | N/O                    | 3.80                                    | 4.33                        | 576                                | corrected                     |                               |
| o    | 12       | 297,004           | 5,389,650         | 2,311            | 27-Jun                   | N/O                    | 3.38                                    | 3.92                        | 573                                | corrected                     |                               |
| E    | 13       | 296,425           | 5,389,185         | 2,447            | 28-Jun                   | 28-Sep                 | 2.82                                    | 3.39                        | 569                                | corrected                     |                               |
| p    | 14       | 296,525           | 5,388,968         | 2,530            | 29-Jun                   | N/O                    | 6.85                                    | 7.45                        | 591                                | corrected                     |                               |
| q    | 15       | 296,845           | 5,388,960         | 2,533            | 29-Jun                   | 28-Sep                 | 4.15                                    | 4.75                        | 578                                | corrected                     |                               |
| ID   | Old ID # | Δ Snow Height (m) | Δ Firn Height (m) | Δ Ice Height (m) | Total Meas. Δ Height (m) | Δ Mass – Snow (m w.e.) | Δ Mass – Firn (m w.e.)                  | Δ Mass – Ice (m w.e.)       | <i>b<sub>s</sub></i> (m w.e.)      | <i>b<sub>w</sub></i> (m w.e.) | <i>b<sub>a</sub></i> (m w.e.) |
| A    | 1        | -4.64             | 0.00              | -1.48            | -6.12                    | -2.68                  | 0.00                                    | -1.29                       | -3.97                              | 2.68                          | -1.29                         |
| C    | 2        | -4.97             | 0.00              | -1.12            | -6.09                    | -2.88                  | 0.00                                    | -0.98                       | -3.86                              | 2.88                          | -0.98                         |
| D    | 3        | N/O               | N/O               | N/O              | N/O                      | N/O                    | N/O                                     | N/O                         | N/O                                | 3.60                          | N/O                           |
| h    | 4        | -5.43             | 0.00              | -0.86            | -6.29                    | -3.16                  | 0.00                                    | -0.75                       | -3.91                              | 3.16                          | -0.75                         |

|                |    |       |      |       |       |       |      |       |       |      |       |
|----------------|----|-------|------|-------|-------|-------|------|-------|-------|------|-------|
| G              | 5  | -4.48 | 0.00 | -0.73 | -5.21 | -2.58 | 0.00 | -0.64 | -3.22 | 2.58 | -0.64 |
| i              | 6  | N/O   | N/O  | N/O   | N/O   | N/O   | N/O  | N/O   | N/O   | 4.46 | N/O   |
| j              | 7  | N/O   | N/O  | N/O   | N/O   | N/O   | N/O  | N/O   | N/O   | 2.68 | N/O   |
| k              | 8  | N/O   | N/O  | N/O   | N/O   | N/O   | N/O  | N/O   | N/O   | 2.89 | N/O   |
| l              | 9  | -4.07 | 0.00 | -1.85 | -5.92 | -2.34 | 0.00 | -1.62 | -3.95 | 2.34 | -1.62 |
| m              | 10 | -3.99 | 0.00 | -2.16 | -6.15 | -2.29 | 0.00 | -1.89 | -4.18 | 2.29 | -1.89 |
| n              | 11 | N/O   | N/O  | N/O   | N/O   | N/O   | N/O  | N/O   | N/O   | 2.49 | N/O   |
| o              | 12 | N/O   | N/O  | N/O   | N/O   | N/O   | N/O  | N/O   | N/O   | 2.25 | N/O   |
| E              | 13 | -3.39 | 0.00 | -1.88 | -5.27 | -1.93 | 0.00 | -1.64 | -3.57 | 1.93 | -1.64 |
| p              | 14 | N/O   | N/O  | N/O   | N/O   | N/O   | N/O  | N/O   | N/O   | 4.40 | N/O   |
| q              | 15 | -4.75 | 0.00 | -0.30 | -5.05 | -2.75 | 0.00 | -0.26 | -3.01 | 2.75 | -0.26 |
| <b>Count:</b>  |    | 8     | 8    | 8     | 8     | 8     | 8    | 8     | 8     | 15   | 8     |
| <b>Mean:</b>   |    | -4.47 | 0.00 | -1.30 | -5.76 | -2.58 | 0.00 | -1.13 | -3.71 | 2.89 | -1.13 |
| <b>Median:</b> |    | -4.56 | 0.00 | -1.30 | -6.01 | -2.63 | 0.00 | -1.14 | -3.89 | 2.68 | -1.14 |
| <b>StdDev:</b> |    | 0.64  | 0.00 | 0.65  | 0.50  | 0.38  | 0.00 | 0.57  | 0.41  | 0.74 | 0.57  |
| <b>Min:</b>    |    | -5.43 | 0.00 | -2.16 | -6.29 | -3.16 | 0.00 | -1.89 | -4.18 | 1.93 | -1.89 |
| <b>Max:</b>    |    | -3.39 | 0.00 | -0.30 | -5.05 | -1.93 | 0.00 | -0.26 | -3.01 | 4.46 | -0.26 |
| <b>Range:</b>  |    | 2.04  | 0.00 | 1.86  | 1.24  | 1.23  | 0.00 | 1.63  | 1.17  | 2.53 | 1.63  |

**Table S14: 2007 ablation stake sites**  
**Coordinates: NAD83 UTM Zone 12N**

| 2007 |          |                   |                   |                  |                          |                        |                                         |                       |                                    |                         |                         |
|------|----------|-------------------|-------------------|------------------|--------------------------|------------------------|-----------------------------------------|-----------------------|------------------------------------|-------------------------|-------------------------|
| ID   | Old ID # | Eastings          | Northing          | Elev (m)         | Install Date             | Final Visit Date       | Measured Snow Depth on Install Date (m) | #Depth on May 26 (m)  | Snow Density (kg m <sup>-3</sup> ) | GPS                     |                         |
| *E   | *1       | 296,420           | 5,389,180         | 2,445            | 22-Jun                   | N/O                    | 2.25                                    | 3.33                  | 467                                | corrected               |                         |
| r    | 2        | 296,518           | 5,389,019         | 2,509            | 23-Jun                   | 8-Sep                  | 3.80                                    | 4.92                  | 467                                | corrected               |                         |
| D    | 3        | 296,656           | 5,388,895         | 2,547            | 23-Jun                   | 8-Sep                  | 5.31                                    | 6.43                  | 467                                | corrected               |                         |
| q    | 4        | 296,854           | 5,388,990         | 2,521            | 23-Jun                   | 8-Sep                  | 3.70                                    | 4.82                  | 467                                | corrected               |                         |
| s    | 5        | 297,307           | 5,389,468         | 2,407            | 23-Jun                   | 9-Sep                  | 4.83                                    | 5.95                  | 467                                | corrected               |                         |
| t    | 6        | 297,234           | 5,389,813         | 2,318            | 24-Jun                   | 9-Sep                  | 3.50                                    | 4.66                  | 467                                | corrected               |                         |
| F    | 7        | 297,158           | 5,389,554         | 2,354            | 24-Jun                   | 9-Sep                  | 4.20                                    | 5.36                  | 467                                | corrected               |                         |
| C    | 8        | 296,753           | 5,389,173         | 2,450            | 24-Jun                   | 8-Sep                  | 3.50                                    | 4.66                  | 467                                | corrected               |                         |
| k    | 9        | 297,099           | 5,389,341         | 2,407            | 14-Jul                   | 9-Sep                  | 1.10                                    | NA                    | 467                                | corrected               |                         |
| G    | 10       | 297,004           | 5,389,140         | 2,475            | 14-Jul                   | 8-Sep                  | 1.25                                    | NA                    | 467                                | corrected               |                         |
| A    | 11       | 296,746           | 5,389,407         | 2,376            | 14-Jul                   | 9-Sep                  | 1.93                                    | NA                    | 467                                | corrected               |                         |
| B    | 12       | 296,993           | 5,389,589         | 2,326            | 14-Jul                   | 9-Sep                  | 1.80                                    | NA                    | 467                                | corrected               |                         |
| ID   | Old ID # | Δ Snow Height (m) | Δ Firn Height (m) | Δ Ice Height (m) | Total Meas. Δ Height (m) | Δ Mass – Snow (m w.e.) | Δ Mass – Firn (m w.e.)                  | Δ Mass – Ice (m w.e.) | b <sub>s</sub> (m w.e.)            | b <sub>w</sub> (m w.e.) | b <sub>a</sub> (m w.e.) |
| *E   | *1       | -3.33             | N/O               | N/O              | N/O                      | -1.56                  | N/O                                     | N/O                   | N/O                                | 1.56                    | N/O                     |
| r    | 2        | -4.92             | 0.00              | -2.04            | -6.96                    | -2.30                  | 0.00                                    | -1.78                 | -4.08                              | 2.30                    | -1.78                   |
| D    | 3        | -6.43             | -0.18             | -0.65            | -7.26                    | -3.00                  | -0.13                                   | -0.57                 | -3.70                              | 3.00                    | -0.70                   |
| q    | 4        | -4.82             | -0.50             | -1.68            | -7.00                    | -2.25                  | -0.36                                   | -1.47                 | -4.08                              | 2.25                    | -1.83                   |
| s    | 5        | -5.95             | 0.00              | -0.74            | -6.69                    | -2.78                  | 0.00                                    | -0.65                 | -3.43                              | 2.78                    | -0.65                   |
| t    | 6        | -4.66             | 0.00              | -2.47            | -7.13                    | -2.18                  | 0.00                                    | -2.16                 | -4.34                              | 2.18                    | -2.16                   |
| F    | 7        | -5.36             | 0.00              | -1.57            | -6.93                    | -2.50                  | 0.00                                    | -1.37                 | -3.88                              | 2.50                    | -1.37                   |
| C    | 8        | -4.66             | 0.00              | -2.37            | -7.03                    | -2.18                  | 0.00                                    | -2.07                 | -4.25                              | 2.18                    | -2.07                   |
| k    | 9        | -1.10             | 0.00              | -2.65            | -3.75                    | -0.51                  | 0.00                                    | -2.32                 | N/O                                | N/O                     | -2.32                   |
| G    | 10       | -1.25             | 0.00              | -2.20            | -3.45                    | -0.58                  | 0.00                                    | -1.92                 | N/O                                | N/O                     | -1.92                   |
| A    | 11       | -1.93             | 0.00              | -2.05            | -3.98                    | -0.90                  | 0.00                                    | -1.79                 | N/O                                | N/O                     | -1.79                   |

| B              | 12    | -1.80 | 0.00  | -2.00 | -3.80 | -0.84 | 0.00  | -1.75 | N/O  | N/O   | -1.75 |
|----------------|-------|-------|-------|-------|-------|-------|-------|-------|------|-------|-------|
| <b>Count:</b>  | 8     | 7     | 11    | 7     | 8     | 7     | 11    | 7     | 8    | 11    |       |
| <b>Mean:</b>   | -5.02 | -0.10 | -1.86 | -7.00 | -2.34 | -0.07 | -1.62 | -3.96 | 2.34 | -1.67 |       |
| <b>Median:</b> | -4.87 | 0.00  | -2.04 | -7.00 | -2.27 | 0.00  | -1.78 | -4.08 | 2.27 | -1.79 |       |
| <b>StdDev:</b> | 0.94  | 0.19  | 0.66  | 0.18  | 0.44  | 0.14  | 0.57  | 0.32  | 0.44 | 0.55  |       |
| <b>Min:</b>    | -6.43 | -0.50 | -2.65 | -7.26 | -3.00 | -0.36 | -2.32 | -4.34 | 1.56 | -2.32 |       |
| <b>Max:</b>    | -3.33 | 0.00  | -0.65 | -6.69 | -1.56 | 0.00  | -0.57 | -3.43 | 3.00 | -0.65 |       |
| <b>Range:</b>  | 3.10  | 0.50  | 2.00  | 0.57  | 1.45  | 0.36  | 1.75  | 0.91  | 1.45 | 1.67  |       |



**Table S15:** 2008 ablation stake sites  
**Coordinates:** NAD83 UTM Zone  
 12N

| 2008           |          |                   |                   |                  |                          |                        |                                         |                            |                                    |                               |                               |
|----------------|----------|-------------------|-------------------|------------------|--------------------------|------------------------|-----------------------------------------|----------------------------|------------------------------------|-------------------------------|-------------------------------|
| ID             | Old ID # | Easting           | Northing          | Elev (m)         | Install Date             | Final Visit Date       | Measured Snow Depth on Install Date (m) | ±Snow Depth on June 16 (m) | Snow Density (kg m <sup>-3</sup> ) | GPS                           |                               |
| A              | 1        | 296,746           | 5,389,407         | 2,376            | 9-Jul                    | 11-Sep                 | 4.00                                    | 5.85                       | 463                                | corrected                     |                               |
| B              | 2        | 296,993           | 5,389,588         | 2,326            | 9-Jul                    | 10-Sep                 | 4.60                                    | 6.45                       | 463                                | corrected                     |                               |
| C              | 3        | 296,712           | 5,389,167         | 2,454            | 10-Jul                   | 11-Sep                 | 5.10                                    | 6.75                       | 463                                | corrected                     |                               |
| D              | 4        | 296,682           | 5,388,898         | 2,542            | 10-Jul                   | 12-Sep                 | 6.00                                    | 8.15                       | 463                                | corrected                     |                               |
| E              | 5        | 296,441           | 5,389,174         | 2,449            | 10-Jul                   | 12-Sep                 | 2.85                                    | 4.55                       | 463                                | corrected                     |                               |
| F              | 6        | 297,158           | 5,389,555         | 2,353            | 10-Jul                   | 10-Sep                 | 5.30                                    | 6.95                       | 463                                | corrected                     |                               |
| G              | 7        | 297,004           | 5,389,140         | 2,475            | 10-Jul                   | 11-Sep                 | 5.00                                    | 6.45                       | 463                                | corrected                     |                               |
| ID             | Old ID # | Δ Snow Height (m) | Δ Firn Height (m) | Δ Ice Height (m) | Total Meas. Δ Height (m) | Δ Mass – Snow (m w.e.) | Δ Mass – Firn (m w.e.)                  | Δ Mass – Ice (m w.e.)      | <i>b<sub>s</sub></i> (m w.e.)      | <i>b<sub>w</sub></i> (m w.e.) | <i>b<sub>a</sub></i> (m w.e.) |
| A              | 1        | -5.15             | 0.00              | 0.00             | -5.15                    | -2.38                  | 0.00                                    | 0.00                       | -2.38                              | 2.71                          | 0.32                          |
| B              | 2        | -5.14             | 0.00              | 0.00             | -5.14                    | -2.38                  | 0.00                                    | 0.00                       | -2.38                              | 2.99                          | 0.61                          |
| C              | 3        | -5.01             | 0.00              | 0.00             | -5.01                    | -2.32                  | 0.00                                    | 0.00                       | -2.32                              | 3.13                          | 0.81                          |
| D              | 4        | -4.11             | 0.00              | 0.00             | -4.11                    | -1.90                  | 0.00                                    | 0.00                       | -1.90                              | 3.77                          | 1.87                          |
| E              | 5        | -4.28             | 0.00              | -0.51            | -4.79                    | -1.98                  | 0.00                                    | -0.45                      | -2.43                              | 2.11                          | -0.32                         |
| F              | 6        | -4.66             | 0.00              | 0.00             | -4.66                    | -2.16                  | 0.00                                    | 0.00                       | -2.16                              | 3.22                          | 1.06                          |
| G              | 7        | -4.36             | 0.00              | 0.00             | -4.36                    | -2.02                  | 0.00                                    | 0.00                       | -2.02                              | 2.99                          | 0.97                          |
| <b>Count:</b>  |          | 7                 | 7                 | 7                | 7                        | 7                      | 7                                       | 7                          | 7                                  | 7                             | 7                             |
| <b>Mean:</b>   |          | -4.67             | 0.00              | -0.07            | -4.75                    | -2.16                  | 0.00                                    | -0.06                      | -2.23                              | 2.99                          | 0.76                          |
| <b>Median:</b> |          | -4.66             | 0.00              | 0.00             | -4.79                    | -2.16                  | 0.00                                    | 0.00                       | -2.32                              | 2.99                          | 0.81                          |
| <b>StdDev:</b> |          | 0.43              | 0.00              | 0.19             | 0.40                     | 0.20                   | 0.00                                    | 0.17                       | 0.20                               | 0.51                          | 0.68                          |
| <b>Min:</b>    |          | -5.15             | 0.00              | -0.51            | -5.15                    | -2.38                  | 0.00                                    | -0.45                      | -2.43                              | 2.11                          | -0.32                         |
| <b>Max:</b>    |          | -4.11             | 0.00              | 0.00             | -4.11                    | -1.90                  | 0.00                                    | 0.00                       | -1.90                              | 3.77                          | 1.87                          |
| <b>Range:</b>  |          | 1.04              | 0.00              | 0.51             | 1.04                     | 0.48                   | 0.00                                    | 0.45                       | 0.52                               | 1.67                          | 2.19                          |

**Table S16:** 2009 ablation stake sites  
**Coordinates:** NAD83 UTM Zone  
 12N

| 2009           |          |                   |                   |                  |                          |                        |                                         |                            |                                    |                               |                               |
|----------------|----------|-------------------|-------------------|------------------|--------------------------|------------------------|-----------------------------------------|----------------------------|------------------------------------|-------------------------------|-------------------------------|
| ID             | Old ID # | Easting           | Northing          | Elev (m)         | Install Date             | Final Visit Date       | Measured Snow Depth on Install Date (m) | ‡Snow Depth on June 16 (m) | Snow Density (kg m <sup>-3</sup> ) | GPS                           |                               |
| A              | 1        | 296,749           | 5,389,407         | 2,376            | 16-Jun                   | 18-Sep                 | N/O                                     | 3.55                       | 570                                | corrected                     |                               |
| B              | 2        | 296,994           | 5,389,586         | 2,326            | 16-Jun                   | 18-Sep                 | N/O                                     | 3.75                       | 572                                | corrected                     |                               |
| D              | 4        | 296,682           | 5,388,899         | 2,543            | 17-Jun                   | 18-Sep                 | N/O                                     | 6.60                       | 588                                | corrected                     |                               |
| E              | 5        | 296,453           | 5,389,183         | 2,449            | 16-Jun                   | 18-Sep                 | N/O                                     | 2.20                       | 557                                | corrected                     |                               |
| F              | 6        | 297,158           | 5,389,555         | 2,352            | 16-Jun                   | 18-Sep                 | N/O                                     | 4.00                       | 574                                | corrected                     |                               |
| G              | 7        | 297,004           | 5,389,142         | 2,475            | 17-Jun                   | 18-Sep                 | N/O                                     | 3.75                       | 572                                | corrected                     |                               |
| ID             | Old ID # | Δ Snow Height (m) | Δ Firn Height (m) | Δ Ice Height (m) | Total Meas. Δ Height (m) | Δ Mass – Snow (m w.e.) | Δ Mass – Firn (m w.e.)                  | Δ Mass – Ice (m w.e.)      | <i>b<sub>s</sub></i> (m w.e.)      | <i>b<sub>w</sub></i> (m w.e.) | <i>b<sub>a</sub></i> (m w.e.) |
| A              | 1        | -3.66             | -0.26             | -1.73            | -5.65                    | -2.09                  | -0.19                                   | -1.51                      | -3.79                              | 2.03                          | -1.76                         |
| B              | 2        | -3.75             | -0.76             | -1.32            | -5.83                    | -2.14                  | -0.55                                   | -1.15                      | -3.85                              | 2.14                          | -1.70                         |
| D              | 4        | -6.35             | 0.00              | 0.00             | -6.35                    | -3.73                  | 0.00                                    | 0.00                       | -3.73                              | 3.88                          | 0.15                          |
| E              | 5        | -2.49             | 0.00              | -2.56            | -5.05                    | -1.39                  | 0.00                                    | -2.24                      | -3.63                              | 1.23                          | -2.40                         |
| F              | 6        | -4.28             | -1.51             | -0.76            | -6.55                    | -2.46                  | -1.09                                   | -0.66                      | -4.21                              | 2.29                          | -1.91                         |
| G              | 7        | -3.72             | -1.38             | -1.27            | -6.37                    | -2.13                  | -0.99                                   | -1.11                      | -4.23                              | 2.14                          | -2.09                         |
| <b>Count:</b>  |          | 6                 | 6                 | 6                | 6                        | 6                      | 6                                       | 6                          | 6                                  | 6                             | 6                             |
| <b>Mean:</b>   |          | -4.04             | -0.65             | -1.27            | -5.97                    | -2.32                  | -0.47                                   | -1.11                      | -3.90                              | 2.29                          | -1.62                         |
| <b>Median:</b> |          | -3.74             | -0.51             | -1.30            | -6.09                    | -2.14                  | -0.37                                   | -1.13                      | -3.82                              | 2.14                          | -1.84                         |
| <b>StdDev:</b> |          | 1.27              | 0.68              | 0.87             | 0.57                     | 0.77                   | 0.49                                    | 0.76                       | 0.25                               | 0.87                          | 0.90                          |
| <b>Min:</b>    |          | -6.35             | -1.51             | -2.56            | -6.55                    | -3.73                  | -1.09                                   | -2.24                      | -4.23                              | 1.23                          | -2.40                         |
| <b>Max:</b>    |          | -2.49             | 0.00              | 0.00             | -5.05                    | -1.39                  | 0.00                                    | 0.00                       | -3.63                              | 3.88                          | 0.15                          |
| <b>Range:</b>  |          | 3.86              | 1.51              | 2.56             | 1.50                     | 2.34                   | 1.09                                    | 2.24                       | 0.61                               | 2.65                          | 2.55                          |

**Table S17: 2010 ablation stake sites**  
**Coordinates: NAD83 UTM Zone**  
**12N**

| 2010           |          |                   |                   |                  |                          |                        |                                         |                                |                                    |                               |                               |
|----------------|----------|-------------------|-------------------|------------------|--------------------------|------------------------|-----------------------------------------|--------------------------------|------------------------------------|-------------------------------|-------------------------------|
| ID             | Old ID # | Easting           | Northing          | Elev (m)         | Install Date             | Final Visit Date       | Measured Snow Depth on Install Date (m) | Normalized Date Snow Depth (m) | Snow Density (kg m <sup>-3</sup> ) | GPS                           |                               |
| A              | 1        | 296,743           | 5,389,407         | 2,380            | 23-Jun                   | 2-Oct                  | 4.10                                    | N/A                            | 574                                | corrected                     |                               |
| B              | 2        | 296,990           | 5,389,585         | 2,324            | 23-Jun                   | 2-Oct                  | 4.00                                    | N/A                            | 574                                | corrected                     |                               |
| C              | 3        | 296,712           | 5,389,162         | 2,464            | 23-Jun                   | 2-Oct                  | 5.45                                    | N/A                            | 582                                | corrected                     |                               |
| D              | 4        | 296,686           | 5,388,896         | 2,549            | 23-Jun                   | 2-Oct                  | 6.40                                    | N/A                            | 587                                | corrected                     |                               |
| E              | 5        | 296,443           | 5,389,176         | 2,461            | 23-Jun                   | 2-Oct                  | 4.85                                    | N/A                            | 579                                | corrected                     |                               |
| F              | 6        | 297,158           | 5,389,562         | 2,352            | 23-Jun                   | 2-Oct                  | 4.60                                    | N/A                            | 578                                | corrected                     |                               |
| G              | 7        | 297,003           | 5,389,133         | 2,486            | 23-Jun                   | 2-Oct                  | 4.70                                    | N/A                            | 578                                | corrected                     |                               |
| ID             | Old ID # | Δ Snow Height (m) | Δ Firn Height (m) | Δ Ice Height (m) | Total Meas. Δ Height (m) | Δ Mass – Snow (m w.e.) | Δ Mass – Firn (m w.e.)                  | Δ Mass – Ice (m w.e.)          | <i>b<sub>s</sub></i> (m w.e.)      | <i>b<sub>w</sub></i> (m w.e.) | <i>b<sub>a</sub></i> (m w.e.) |
| A              | 1        | -4.10             | 0.00              | -0.96            | -5.06                    | -2.36                  | 0.00                                    | -0.84                          | -3.19                              | 2.36                          | -0.84                         |
| B              | 2        | -4.00             | 0.00              | -1.03            | -5.03                    | -2.29                  | 0.00                                    | -0.90                          | -3.20                              | 2.29                          | -0.90                         |
| C              | 3        | -5.18             | 0.00              | 0.00             | -5.18                    | -3.02                  | 0.00                                    | 0.00                           | -3.02                              | 3.17                          | 0.16                          |
| D              | 4        | -4.49             | 0.00              | 0.00             | -4.49                    | -2.63                  | 0.00                                    | 0.00                           | -2.63                              | 3.75                          | 1.12                          |
| E              | 5        | -4.85             | 0.00              | -0.31            | -5.16                    | -2.81                  | 0.00                                    | -0.27                          | -3.08                              | 2.81                          | -0.27                         |
| F              | 6        | -4.60             | 0.00              | -0.14            | -4.74                    | -2.66                  | 0.00                                    | -0.12                          | -2.78                              | 2.66                          | -0.12                         |
| G              | 7        | -4.70             | 0.00              | -0.07            | -4.77                    | -2.72                  | 0.00                                    | -0.06                          | -2.78                              | 2.72                          | -0.06                         |
| <b>Count:</b>  |          | 7                 | 7                 | 7                | 7                        | 7                      | 7                                       | 7                              | 7                                  | 7                             | 7                             |
| <b>Mean:</b>   |          | -4.56             | 0.00              | -0.36            | -4.92                    | -2.64                  | 0.00                                    | -0.31                          | -2.95                              | 2.82                          | -0.13                         |
| <b>Median:</b> |          | -4.60             | 0.00              | -0.14            | -5.03                    | -2.66                  | 0.00                                    | -0.12                          | -3.02                              | 2.72                          | -0.12                         |
| <b>StdDev:</b> |          | 0.41              | 0.00              | 0.45             | 0.26                     | 0.25                   | 0.00                                    | 0.39                           | 0.22                               | 0.50                          | 0.68                          |
| <b>Min:</b>    |          | -5.18             | 0.00              | -1.03            | -5.18                    | -3.02                  | 0.00                                    | -0.90                          | -3.20                              | 2.29                          | -0.90                         |
| <b>Max:</b>    |          | -4.00             | 0.00              | 0.00             | -4.49                    | -2.29                  | 0.00                                    | 0.00                           | -2.63                              | 3.75                          | 1.12                          |
| <b>Range:</b>  |          | 1.18              | 0.00              | 1.03             | 0.69                     | 0.72                   | 0.00                                    | 0.90                           | 0.56                               | 1.46                          | 2.02                          |

**Table S18:** 2011 ablation stake sites  
**Coordinates:** NAD83 UTM Zone  
 12N

| 2011           |          |                          |                          |                         |                                 |                               |                                         |                                |                                    |                |                |
|----------------|----------|--------------------------|--------------------------|-------------------------|---------------------------------|-------------------------------|-----------------------------------------|--------------------------------|------------------------------------|----------------|----------------|
| ID             | Old ID # | Easting                  | Northing                 | Elev (m)                | Install Date                    | Final Visit Date              | Measured Snow Depth on Install Date (m) | Normalized Date Snow Depth (m) | Snow Density (kg m <sup>-3</sup> ) | GPS            |                |
| A              | 1        | 296,741                  | 5,389,397                | 2,380                   | 24-Jun                          | 3-Oct                         | 6.45                                    | N/A                            | 587                                | corrected      |                |
| B              | 2        | 296,992                  | 5,389,597                | 2,324                   | 24-Jun                          | 3-Oct                         | 6.55                                    | N/A                            | 587                                | corrected      |                |
| C              | 3        | 296,714                  | 5,389,170                | 2,464                   | 24-Jun                          | 3-Oct                         | 7.40                                    | N/A                            | 591                                | corrected      |                |
| D              | 4        | 296,687                  | 5,388,900                | 2,549                   | 24-Jun                          | 3-Oct                         | 10.00                                   | N/A                            | 599                                | corrected      |                |
| E              | 5        | 296,440                  | 5,389,172                | 2,461                   | 24-Jun                          | 3-Oct                         | 5.65                                    | N/A                            | 583                                | corrected      |                |
| F              | 6        | 297,155                  | 5,389,566                | 2,352                   | 24-Jun                          | 3-Oct                         | 5.90                                    | N/A                            | 584                                | corrected      |                |
| G              | 7        | 296,997                  | 5,389,120                | 2,486                   | 24-Jun                          | 3-Oct                         | 7.20                                    | N/A                            | 590                                | corrected      |                |
| ID             | Old ID # | $\Delta$ Snow Height (m) | $\Delta$ Firn Height (m) | $\Delta$ Ice Height (m) | Total Meas. $\Delta$ Height (m) | $\Delta$ Mass – Snow (m w.e.) | $\Delta$ Mass – Firn (m w.e.)           | $\Delta$ Mass – Ice (m w.e.)   | $b_s$ (m w.e.)                     | $b_w$ (m w.e.) | $b_a$ (m w.e.) |
| A              | 1        | -6.41                    | 0.00                     | 0.00                    | -6.41                           | -3.76                         | 0.00                                    | 0.00                           | -3.76                              | 3.79           | 0.02           |
| B              | 2        | -5.92                    | 0.00                     | 0.00                    | -5.92                           | -3.48                         | 0.00                                    | 0.00                           | -3.48                              | 3.85           | 0.37           |
| C              | 3        | -6.05                    | 0.00                     | 0.00                    | -6.05                           | -3.57                         | 0.00                                    | 0.00                           | -3.57                              | 4.37           | 0.80           |
| D              | 4        | -5.16                    | 0.00                     | 0.00                    | -5.16                           | -3.09                         | 0.00                                    | 0.00                           | -3.09                              | 5.99           | 2.90           |
| E              | 5        | -5.65                    | 0.00                     | 0.00                    | -5.65                           | -3.30                         | 0.00                                    | 0.00                           | -3.30                              | 3.30           | 0.00           |
| F              | 6        | -5.62                    | 0.00                     | 0.00                    | -5.62                           | -3.28                         | 0.00                                    | 0.00                           | -3.28                              | 3.45           | 0.16           |
| G              | 7        | -5.62                    | 0.00                     | 0.00                    | -5.62                           | -3.32                         | 0.00                                    | 0.00                           | -3.32                              | 4.25           | 0.93           |
| <b>Count:</b>  | 7        | 7                        | 7                        | 7                       | 7                               | 7                             | 7                                       | 7                              | 7                                  | 7              | 7              |
| <b>Mean:</b>   | -5.78    | 0.00                     | 0.00                     | -5.78                   | -3.40                           | 0.00                          | 0.00                                    | -3.40                          | 4.14                               | 0.74           |                |
| <b>Median:</b> | -5.65    | 0.00                     | 0.00                     | -5.65                   | -3.32                           | 0.00                          | 0.00                                    | -3.32                          | 3.85                               | 0.37           |                |
| <b>StdDev:</b> | 0.40     | 0.00                     | 0.00                     | 0.40                    | 0.22                            | 0.00                          | 0.00                                    | 0.22                           | 0.90                               | 1.02           |                |
| <b>Min:</b>    | -6.41    | 0.00                     | 0.00                     | -6.41                   | -3.76                           | 0.00                          | 0.00                                    | -3.76                          | 3.30                               | 0.00           |                |
| <b>Max:</b>    | -5.16    | 0.00                     | 0.00                     | -5.16                   | -3.09                           | 0.00                          | 0.00                                    | -3.09                          | 5.99                               | 2.90           |                |
| <b>Range:</b>  | 1.25     | 0.00                     | 0.00                     | 1.25                    | 0.67                            | 0.00                          | 0.00                                    | 0.67                           | 2.69                               | 2.90           |                |

**Table S19:** 2012 ablation stake sites  
**Coordinates:** NAD83 UTM Zone  
 12N

| 2012           |          |                   |                   |                  |                          |                        |                                         |                            |                                    |                               |                               |
|----------------|----------|-------------------|-------------------|------------------|--------------------------|------------------------|-----------------------------------------|----------------------------|------------------------------------|-------------------------------|-------------------------------|
| ID             | Old ID # | Easting           | Northing          | Elev (m)         | Install Date             | Final Visit Date       | Measured Snow Depth on Install Date (m) | ±Snow Depth on June 28 (m) | Snow Density (kg m <sup>-3</sup> ) | GPS                           |                               |
| A              | 1        | 296,737           | 5,389,404         | 2,377            | 12-Jul                   | 1-Oct                  | 4.20                                    | 5.15                       | 581                                | uncorrected                   |                               |
| B              | 2        | 296,987           | 5,389,587         | 2,323            | 12-Jul                   | 1-Oct                  | 4.60                                    | 5.10                       | 580                                | uncorrected                   |                               |
| C              | 3        | 296,709           | 5,389,173         | 2,454            | 12-Jul                   | 1-Oct                  | 5.15                                    | 6.40                       | 587                                | uncorrected                   |                               |
| D              | 4        | 296,679           | 5,388,904         | 2,547            | 12-Jul                   | 1-Oct                  | 8.50                                    | 9.00                       | 596                                | uncorrected                   |                               |
| E              | 5        | 296,440           | 5,389,175         | 2,450            | 12-Jul                   | 1-Oct                  | 3.00                                    | 4.25                       | 575                                | uncorrected                   |                               |
| F              | 6        | 297,156           | 5,389,559         | 2,358            | 12-Jul                   | 1-Oct                  | 5.00                                    | 6.15                       | 586                                | uncorrected                   |                               |
| G              | 7        | 296,995           | 5,389,129         | 2,480            | 12-Jul                   | 1-Oct                  | 5.40                                    | 6.65                       | 588                                | uncorrected                   |                               |
| ID             | Old ID # | Δ Snow Height (m) | Δ Firn Height (m) | Δ Ice Height (m) | Total Meas. Δ Height (m) | Δ Mass – Snow (m w.e.) | Δ Mass – Firn (m w.e.)                  | Δ Mass – Ice (m w.e.)      | <i>b<sub>s</sub></i> (m w.e.)      | <i>b<sub>w</sub></i> (m w.e.) | <i>b<sub>a</sub></i> (m w.e.) |
| A              | 1        | -5.17             | -0.26             | -0.79            | -6.22                    | -3.00                  | -0.19                                   | -0.69                      | -3.88                              | 2.99                          | -0.89                         |
| B              | 2        | -5.12             | -0.64             | -0.14            | -5.90                    | -2.97                  | -0.46                                   | -0.12                      | -3.55                              | 2.96                          | -0.59                         |
| C              | 3        | -6.20             | 0.00              | 0.00             | -6.20                    | -3.64                  | 0.00                                    | 0.00                       | -3.64                              | 3.75                          | 0.12                          |
| D              | 4        | -5.53             | 0.00              | 0.00             | -5.53                    | -3.30                  | 0.00                                    | 0.00                       | -3.30                              | 5.36                          | 2.07                          |
| E              | 5        | -4.24             | 0.00              | -1.53            | -5.77                    | -2.44                  | 0.00                                    | -1.34                      | -3.78                              | 2.45                          | -1.33                         |
| F              | 6        | -6.04             | 0.00              | 0.00             | -6.04                    | -3.54                  | 0.00                                    | 0.00                       | -3.54                              | 3.60                          | 0.06                          |
| G              | 7        | -5.54             | 0.00              | 0.00             | -5.54                    | -3.26                  | 0.00                                    | 0.00                       | -3.26                              | 3.91                          | 0.65                          |
| <b>Count:</b>  |          | 7                 | 7                 | 7                | 7                        | 7                      | 7                                       | 7                          | 7                                  | 7                             | 7                             |
| <b>Mean:</b>   |          | -5.41             | -0.13             | -0.35            | -5.89                    | -3.16                  | -0.09                                   | -0.31                      | -3.56                              | 3.58                          | 0.01                          |
| <b>Median:</b> |          | -5.53             | 0.00              | 0.00             | -5.90                    | -3.26                  | 0.00                                    | 0.00                       | -3.55                              | 3.60                          | 0.06                          |
| <b>StdDev:</b> |          | 0.65              | 0.25              | 0.59             | 0.29                     | 0.40                   | 0.18                                    | 0.52                       | 0.23                               | 0.94                          | 1.13                          |
| <b>Min:</b>    |          | -6.20             | -0.64             | -1.53            | -6.22                    | -3.64                  | -0.46                                   | -1.34                      | -3.88                              | 2.45                          | -1.33                         |
| <b>Max:</b>    |          | -4.24             | 0.00              | 0.00             | -5.53                    | -2.44                  | 0.00                                    | 0.00                       | -3.26                              | 5.36                          | 2.07                          |
| <b>Range:</b>  |          | 1.96              | 0.64              | 1.53             | 0.69                     | 1.20                   | 0.46                                    | 1.34                       | 0.62                               | 2.92                          | 3.40                          |

**Table S20:** 2013 ablation stake sites  
**Coordinates:** NAD83 UTM Zone  
 12N

## 2013

| ID             | Old ID # | Easting           | Northing          | Elev (m)         | Install Date             | Final Visit Date       | Measured Snow Depth on Install Date (m) | Normalized Date Snow Depth (m) | Snow Density (kg m <sup>-3</sup> ) | GPS                           |                               |
|----------------|----------|-------------------|-------------------|------------------|--------------------------|------------------------|-----------------------------------------|--------------------------------|------------------------------------|-------------------------------|-------------------------------|
| A              | 1        | 296,735           | 5,389,408         | 2,382            | 11-Jun                   | 27-Sep                 | 5.05                                    | N/A                            | 580                                | corrected                     |                               |
| B              | 2        | 296,989           | 5,389,589         | 2,328            | 11-Jun                   | 27-Sep                 | 5.15                                    | N/A                            | 581                                | corrected                     |                               |
| C              | 3        | 296,711           | 5,389,178         | 2,460            | 11-Jun                   | 27-Sep                 | 5.05                                    | N/A                            | 580                                | corrected                     |                               |
| D              | 4        | 296,684           | 5,388,910         | 2,551            | 11-Jun                   | 27-Sep                 | 7.25                                    | N/A                            | 590                                | corrected                     |                               |
| E              | 5        | 296,439           | 5,389,176         | 2,458            | 11-Jun                   | 27-Sep                 | 4.50                                    | N/A                            | 577                                | corrected                     |                               |
| F              | 6        | 297,154           | 5,389,565         | 2,348            | 11-Jun                   | 27-Sep                 | 5.30                                    | N/A                            | 581                                | corrected                     |                               |
| G              | 7        | 296,996           | 5,389,131         | 2,486            | 11-Jun                   | 27-Sep                 | 5.05                                    | N/A                            | 580                                | corrected                     |                               |
| ID             | Old ID # | Δ Snow Height (m) | Δ Firn Height (m) | Δ Ice Height (m) | Total Meas. Δ Height (m) | Δ Mass – Snow (m w.e.) | Δ Mass – Firn (m w.e.)                  | Δ Mass – Ice (m w.e.)          | <i>b<sub>s</sub></i> (m w.e.)      | <i>b<sub>w</sub></i> (m w.e.) | <i>b<sub>a</sub></i> (m w.e.) |
| A              | 1        | -5.05             | 0.00              | -2.24            | -7.29                    | -2.93                  | 0.00                                    | -1.96                          | -4.89                              | 2.93                          | -1.96                         |
| B              | 2        | -5.15             | 0.00              | -1.88            | -7.03                    | -2.99                  | 0.00                                    | -1.64                          | -4.63                              | 2.99                          | -1.64                         |
| C              | 3        | -5.05             | -0.22             | -2.14            | -7.41                    | -2.93                  | -0.16                                   | -1.87                          | -4.96                              | 2.93                          | -2.03                         |
| D              | 4        | -6.66             | 0.00              | 0.00             | -6.66                    | -3.93                  | 0.00                                    | 0.00                           | -3.93                              | 4.28                          | 0.35                          |
| E              | 5        | -4.50             | 0.00              | -2.69            | -7.19                    | -2.60                  | 0.00                                    | -2.35                          | -4.95                              | 2.60                          | -2.35                         |
| F              | 6        | -5.33             | -0.11             | -1.38            | -6.82                    | -3.10                  | -0.08                                   | -1.21                          | -4.38                              | 3.08                          | -1.30                         |
| G              | 7        | -5.05             | -2.14             | 0.00             | -7.19                    | -2.93                  | -1.54                                   | 0.00                           | -4.47                              | 2.93                          | -1.54                         |
| <b>Count:</b>  |          | 7                 | 7                 | 7                | 7                        | 7                      | 7                                       | 7                              | 7                                  | 7                             | 7                             |
| <b>Mean:</b>   |          | -5.26             | -0.35             | -1.48            | -7.08                    | -3.06                  | -0.25                                   | -1.29                          | -4.60                              | 3.11                          | -1.50                         |
| <b>Median:</b> |          | -5.05             | 0.00              | -1.88            | -7.19                    | -2.93                  | 0.00                                    | -1.64                          | -4.63                              | 2.93                          | -1.64                         |
| <b>StdDev:</b> |          | 0.67              | 0.79              | 1.08             | 0.27                     | 0.41                   | 0.57                                    | 0.95                           | 0.38                               | 0.54                          | 0.88                          |
| <b>Min:</b>    |          | -6.66             | -2.14             | -2.69            | -7.41                    | -3.93                  | -1.54                                   | -2.35                          | -4.96                              | 2.60                          | -2.35                         |
| <b>Max:</b>    |          | -4.50             | 0.00              | 0.00             | -6.66                    | -2.60                  | 0.00                                    | 0.00                           | -3.93                              | 4.28                          | 0.35                          |
| <b>Range:</b>  |          | 2.16              | 2.14              | 2.69             | 0.75                     | 1.33                   | 1.54                                    | 2.35                           | 1.03                               | 1.68                          | 2.70                          |

**Table S21:** 2014 ablation stake sites  
**Coordinates:** NAD83 UTM Zone  
 12N

| 2014           |          |                   |                   |                  |                          |                        |                                  |                                |                                    |                               |                               |
|----------------|----------|-------------------|-------------------|------------------|--------------------------|------------------------|----------------------------------|--------------------------------|------------------------------------|-------------------------------|-------------------------------|
| ID             | Old ID # | Easting           | Northing          | Elev (m)         | Install Date             | Final Visit Date       | Installation Date Snow Depth (m) | Normalized Date Snow Depth (m) | Snow Density (kg m <sup>-3</sup> ) | GPS                           |                               |
| A              | 1        | 296,735           | 5,389,408         | 2,382            | 11-Jun                   | 18-Sep                 | 5.45                             | N/A                            | 549                                | uncorrected                   |                               |
| B              | 2        | 296,989           | 5,389,589         | 2,328            | 11-Jun                   | 18-Sep                 | 5.62                             | N/A                            | 536                                | uncorrected                   |                               |
| C              | 3        | 296,711           | 5,389,178         | 2,460            | 11-Jun                   | 18-Sep                 | 5.19                             | N/A                            | 507                                | uncorrected                   |                               |
| D              | 4        | 296,684           | 5,388,910         | 2,551            | 11-Jun                   | 18-Sep                 | 7.95                             | N/A                            | 551                                | uncorrected                   |                               |
| E              | 5        | 296,439           | 5,389,176         | 2,458            | 11-Jun                   | 18-Sep                 | 3.80                             | N/A                            | 536                                | uncorrected                   |                               |
| F              | 6        | 297,154           | 5,389,565         | 2,348            | 11-Jun                   | 18-Sep                 | 5.27                             | N/A                            | 536                                | uncorrected                   |                               |
| G              | 7        | 296,996           | 5,389,131         | 2,486            | 11-Jun                   | 18-Sep                 | 5.28                             | N/A                            | 536                                | uncorrected                   |                               |
| ID             | Old ID # | Δ Snow Height (m) | Δ Firn Height (m) | Δ Ice Height (m) | Total Meas. Δ Height (m) | Δ Mass – Snow (m w.e.) | Δ Mass – Firn (m w.e.)           | Δ Mass – Ice (m w.e.)          | <i>b<sub>s</sub></i> (m w.e.)      | <i>b<sub>w</sub></i> (m w.e.) | <i>b<sub>a</sub></i> (m w.e.) |
| A              | 1        | -5.45             | 0.00              | -0.44            | -5.89                    | -2.99                  | 0.00                             | -0.38                          | -3.38                              | 2.99                          | -0.38                         |
| B              | 2        | -5.62             | 0.00              | -0.13            | -5.75                    | -3.01                  | 0.00                             | -0.11                          | -3.13                              | 3.01                          | -0.11                         |
| C              | 3        | -5.19             | 0.00              | -0.94            | -6.13                    | -2.63                  | 0.00                             | -0.82                          | -3.45                              | 2.63                          | -0.82                         |
| D              | 4        | -5.58             | 0.00              | 0.00             | -5.58                    | -3.07                  | 0.00                             | 0.00                           | -3.07                              | 4.38                          | 1.31                          |
| E              | 5        | -3.80             | 0.00              | -1.57            | -5.37                    | -2.04                  | 0.00                             | -1.37                          | -3.41                              | 2.04                          | -1.37                         |
| F              | 6        | -5.27             | 0.00              | -0.36            | -5.63                    | -2.82                  | 0.00                             | -0.31                          | -3.14                              | 2.82                          | -0.31                         |
| G              | 7        | -5.28             | -0.07             | 0.00             | -5.35                    | -2.83                  | -0.05                            | 0.00                           | -2.88                              | 2.83                          | -0.05                         |
| <b>Count:</b>  |          | 7                 | 7                 | 7                | 7                        | 7                      | 7                                | 7                              | 7                                  | 7                             | 7                             |
| <b>Mean:</b>   |          | -5.17             | -0.01             | -0.49            | -5.67                    | -2.77                  | -0.01                            | -0.43                          | -3.21                              | 2.96                          | -0.25                         |
| <b>Median:</b> |          | -5.28             | 0.00              | -0.36            | -5.63                    | -2.83                  | 0.00                             | -0.31                          | -3.14                              | 2.83                          | -0.31                         |
| <b>StdDev:</b> |          | 0.63              | 0.03              | 0.58             | 0.28                     | 0.36                   | 0.02                             | 0.50                           | 0.21                               | 0.71                          | 0.83                          |
| <b>Min:</b>    |          | -5.62             | -0.07             | -1.57            | -6.13                    | -3.07                  | -0.05                            | -1.37                          | -3.45                              | 2.04                          | -1.37                         |
| <b>Max:</b>    |          | -3.80             | 0.00              | 0.00             | -5.35                    | -2.04                  | 0.00                             | 0.00                           | -2.88                              | 4.38                          | 1.31                          |
| <b>Range:</b>  |          | 1.82              | 0.07              | 1.57             | 0.78                     | 1.04                   | 0.05                             | 1.37                           | 0.57                               | 2.34                          | 2.68                          |

**Table S22:** 2015 ablation stake sites  
**Coordinates:** NAD83 UTM Zone  
 12N

| 2015           |          |                          |                          |                         |                                 |                               |                                  |                                |                                    |                |                |
|----------------|----------|--------------------------|--------------------------|-------------------------|---------------------------------|-------------------------------|----------------------------------|--------------------------------|------------------------------------|----------------|----------------|
| ID             | Old ID # | Easting                  | Northing                 | Elev (m)                | Install Date                    | Final Visit Date              | Installation Date Snow Depth (m) | Normalized Date Snow Depth (m) | Snow Density (kg m <sup>-3</sup> ) | GPS            |                |
| A              | 1        | 296,741                  | 5,389,395                | 2,387                   | 25-May                          | 22-Sep                        | 5.00                             | N/A                            | 491                                | uncorrected    |                |
| B              | 2        | 296,996                  | 5,389,582                | 2,338                   | 25-May                          | 22-Sep                        | 4.62                             | N/A                            | 506                                | uncorrected    |                |
| C              | 3        | 296,713                  | 5,389,175                | 2,460                   | 25-May                          | 22-Sep                        | 5.60                             | N/A                            | 521                                | uncorrected    |                |
| D              | 4        | 296,689                  | 5,388,900                | 2,552                   | 25-May                          | 22-Sep                        | 6.43                             | N/A                            | 506                                | uncorrected    |                |
| E              | 5        | 296,443                  | 5,389,175                | 2,454                   | 25-May                          | 22-Sep                        | 3.93                             | N/A                            | 506                                | uncorrected    |                |
| F              | 6        | 297,156                  | 5,389,565                | 2,363                   | 25-May                          | 22-Sep                        | 4.68                             | N/A                            | 506                                | uncorrected    |                |
| G              | 7        | 296,994                  | 5,389,123                | 2,488                   | 25-May                          | 22-Sep                        | 5.08                             | N/A                            | 506                                | uncorrected    |                |
| Z              | N/A      | 296,825                  | 5,388,829                | 2,567                   | 15-Jun                          | 22-Sep                        | 6.67                             | 8.34                           | 506                                | uncorrected    |                |
| ID             | Old ID # | $\Delta$ Snow Height (m) | $\Delta$ Firn Height (m) | $\Delta$ Ice Height (m) | Total Meas. $\Delta$ Height (m) | $\Delta$ Mass – Snow (m w.e.) | $\Delta$ Mass – Firn (m w.e.)    | $\Delta$ Mass – Ice (m w.e.)   | $b_s$ (m w.e.)                     | $b_w$ (m w.e.) | $b_a$ (m w.e.) |
| A              | 1        | -5.00                    | 0.00                     | -2.15                   | -7.15                           | -2.46                         | 0.00                             | -1.88                          | -4.33                              | 2.46           | -1.88          |
| B              | 2        | -4.62                    | 0.00                     | -2.31                   | -6.93                           | -2.34                         | 0.00                             | -2.02                          | -4.36                              | 2.34           | -2.02          |
| C              | 3        | -5.60                    | 0.00                     | -2.28                   | -7.88                           | -2.92                         | 0.00                             | -1.99                          | -4.91                              | 2.92           | -1.99          |
| D              | 4        | -6.43                    | -0.55                    | 0.00                    | -6.98                           | -3.25                         | -0.40                            | 0.00                           | -3.65                              | 3.25           | -0.40          |
| E              | 5        | -3.93                    | 0.00                     | -3.01                   | -6.94                           | -1.99                         | 0.00                             | -2.63                          | -4.62                              | 1.99           | -2.63          |
| F              | 6        | -4.68                    | 0.00                     | -2.29                   | -6.97                           | -2.37                         | 0.00                             | -2.00                          | -4.37                              | 2.37           | -2.00          |
| G              | 7        | -5.08                    | -2.17                    | 0.00                    | -7.25                           | -2.57                         | -1.56                            | 0.00                           | -4.13                              | 2.57           | -1.56          |
| Z              | N/A      | -6.58                    | 0.00                     | 0.00                    | -6.58                           | -3.33                         | 0.00                             | 0.00                           | -3.33                              | 4.22           | 0.89           |
| <b>Count:</b>  |          | 8                        | 8                        | 8                       | 8                               | 8                             | 8                                | 8                              | 8                                  | 8              | 8              |
| <b>Mean:</b>   |          | -5.24                    | -0.34                    | -1.51                   | -7.09                           | -2.65                         | -0.24                            | -1.32                          | -4.21                              | 2.76           | -1.45          |
| <b>Median:</b> |          | -5.04                    | 0.00                     | -2.22                   | -6.98                           | -2.51                         | 0.00                             | -1.94                          | -4.35                              | 2.51           | -1.94          |
| <b>StdDev:</b> |          | 0.91                     | 0.76                     | 1.27                    | 0.38                            | 0.47                          | 0.55                             | 1.11                           | 0.51                               | 0.70           | 1.14           |
| <b>Min:</b>    |          | -6.58                    | -2.17                    | -3.01                   | -7.88                           | -3.33                         | -1.56                            | -2.63                          | -4.91                              | 1.99           | -2.63          |
| <b>Max:</b>    |          | -3.93                    | 0.00                     | 0.00                    | -6.58                           | -1.99                         | 0.00                             | 0.00                           | -3.33                              | 4.22           | 0.89           |
| <b>Range:</b>  |          | 2.65                     | 2.17                     | 3.01                    | 1.30                            | 1.34                          | 1.56                             | 2.63                           | 1.58                               | 2.23           | 3.52           |
